# Supplementary material for: Comprehensive Analysis of Codon Usage on Rabies Virus and Other Lyssaviruses
Source: MDPI journal article supplement (doi:10.3390/ijms19082397), 2018-08-14
Supplement: s1 [file s1]

**Supplemental table 1 Nucleotide composition analysis of lyssavirus coding sequences (%).**

**A. Nucleotide composition analysis of RABV coding sequences (%).**

| <b>No</b> | <b>A</b> | <b>T</b> | <b>G</b> | <b>C</b> | <b>A<sub>3</sub></b> | <b>T<sub>3</sub></b> | <b>G<sub>3</sub></b> | <b>C<sub>3</sub></b> | <b>AU</b> | <b>GC</b> | <b>GC<sub>1</sub></b> | <b>GC<sub>2</sub></b> | <b>GC<sub>3</sub></b> | <b>GC<sub>12</sub></b> | <b>ENC</b> |
|-----------|----------|----------|----------|----------|----------------------|----------------------|----------------------|----------------------|-----------|-----------|-----------------------|-----------------------|-----------------------|------------------------|------------|
| 1         | 28.41    | 26.31    | 22.54    | 22.73    | 32.58                | 31.99                | 31.31                | 30.12                | 54.70     | 45.30     | 48.53                 | 39.63                 | 47.66                 | 44.08                  | 54.13      |
| 2         | 28.29    | 26.34    | 22.61    | 22.76    | 32.40                | 31.86                | 31.36                | 30.36                | 54.60     | 45.40     | 48.56                 | 39.63                 | 47.93                 | 44.10                  | 53.84      |
| 3         | 28.41    | 26.11    | 22.60    | 22.89    | 32.97                | 31.91                | 30.58                | 30.28                | 54.50     | 45.50     | 49.28                 | 39.77                 | 47.39                 | 44.52                  | 54.47      |
| 4         | 28.31    | 26.54    | 22.64    | 22.51    | 32.30                | 33.24                | 31.04                | 29.19                | 54.90     | 45.10     | 48.81                 | 39.90                 | 46.73                 | 44.35                  | 53.61      |
| 5         | 28.22    | 26.05    | 22.74    | 22.99    | 32.59                | 31.52                | 31.23                | 30.51                | 54.30     | 45.70     | 49.29                 | 39.86                 | 48.05                 | 44.57                  | 54.01      |
| 6         | 28.24    | 26.12    | 22.74    | 22.90    | 31.68                | 31.81                | 31.90                | 30.72                | 54.40     | 45.60     | 48.83                 | 39.55                 | 48.54                 | 44.19                  | 53.74      |
| 7         | 28.62    | 25.92    | 22.39    | 23.08    | 34.27                | 30.97                | 29.61                | 30.74                | 54.50     | 45.50     | 49.48                 | 39.76                 | 47.16                 | 44.62                  | 53.49      |
| 8         | 28.64    | 25.92    | 22.37    | 23.08    | 34.27                | 31.02                | 29.58                | 30.75                | 54.60     | 45.40     | 49.45                 | 39.76                 | 47.14                 | 44.60                  | 53.50      |
| 9         | 28.64    | 25.93    | 22.36    | 23.08    | 34.31                | 31.01                | 29.54                | 30.74                | 54.60     | 45.40     | 49.45                 | 39.76                 | 47.11                 | 44.60                  | 53.50      |
| 10        | 28.62    | 25.92    | 22.37    | 23.10    | 34.35                | 30.96                | 29.50                | 30.76                | 54.50     | 45.50     | 49.51                 | 39.79                 | 47.11                 | 44.65                  | 53.50      |
| 11        | 28.61    | 25.93    | 22.38    | 23.09    | 34.27                | 31.01                | 29.58                | 30.74                | 54.50     | 45.50     | 49.51                 | 39.76                 | 47.14                 | 44.63                  | 53.53      |
| 12        | 28.34    | 26.45    | 22.63    | 22.58    | 32.10                | 33.05                | 31.74                | 29.30                | 54.80     | 45.20     | 48.77                 | 39.63                 | 47.23                 | 44.20                  | 53.39      |
| 13        | 28.33    | 26.48    | 22.63    | 22.56    | 32.30                | 32.98                | 31.56                | 29.34                | 54.80     | 45.20     | 48.68                 | 39.75                 | 47.14                 | 44.22                  | 53.50      |
| 14        | 28.35    | 26.21    | 22.71    | 22.72    | 32.15                | 32.23                | 31.87                | 29.91                | 54.60     | 45.40     | 48.78                 | 39.64                 | 47.88                 | 44.21                  | 53.57      |
| 15        | 28.40    | 26.20    | 22.68    | 22.71    | 32.14                | 32.36                | 31.82                | 29.90                | 54.60     | 45.40     | 48.78                 | 39.61                 | 47.79                 | 44.20                  | 53.41      |
| 16        | 28.33    | 26.39    | 22.61    | 22.67    | 32.24                | 32.82                | 31.61                | 29.55                | 54.70     | 45.30     | 48.93                 | 39.59                 | 47.33                 | 44.26                  | 53.63      |
| 17        | 28.10    | 26.12    | 22.94    | 22.83    | 31.79                | 32.06                | 32.05                | 30.02                | 54.20     | 45.80     | 49.39                 | 39.75                 | 48.18                 | 44.57                  | 54.76      |
| 18        | 28.43    | 26.41    | 22.62    | 22.54    | 32.50                | 33.00                | 31.59                | 29.02                | 54.80     | 45.20     | 48.94                 | 39.58                 | 46.94                 | 44.26                  | 53.60      |
| 19        | 28.36    | 26.03    | 22.51    | 23.10    | 33.07                | 31.49                | 30.62                | 30.64                | 54.40     | 45.60     | 49.32                 | 39.81                 | 47.70                 | 44.56                  | 53.58      |
| 20        | 28.40    | 26.36    | 22.61    | 22.62    | 32.39                | 32.66                | 31.73                | 29.43                | 54.80     | 45.20     | 48.72                 | 39.65                 | 47.33                 | 44.19                  | 53.28      |
| 21        | 28.32    | 26.38    | 22.64    | 22.63    | 32.01                | 32.83                | 31.83                | 29.53                | 54.70     | 45.30     | 48.74                 | 39.61                 | 47.49                 | 44.17                  | 53.44      |
| 22        | 28.36    | 26.48    | 22.63    | 22.53    | 32.20                | 33.27                | 31.87                | 28.94                | 54.80     | 45.20     | 48.98                 | 39.50                 | 46.98                 | 44.24                  | 53.34      |

|    |       |       |       |       |       |       |       |       |       |       |       |       |       |       |       |
|----|-------|-------|-------|-------|-------|-------|-------|-------|-------|-------|-------|-------|-------|-------|-------|
| 23 | 28.27 | 25.94 | 22.90 | 22.89 | 32.47 | 31.18 | 31.81 | 30.40 | 54.20 | 45.80 | 48.98 | 40.05 | 48.35 | 44.52 | 53.85 |
| 24 | 28.16 | 25.80 | 23.03 | 23.00 | 32.08 | 31.08 | 32.28 | 30.47 | 54.00 | 46.00 | 49.32 | 40.04 | 48.74 | 44.68 | 53.84 |
| 25 | 28.64 | 25.92 | 22.37 | 23.08 | 33.50 | 30.85 | 30.60 | 31.09 | 54.60 | 45.40 | 48.91 | 39.47 | 47.96 | 44.19 | 53.01 |
| 26 | 28.09 | 26.20 | 23.00 | 22.71 | 31.49 | 32.45 | 32.95 | 29.07 | 54.30 | 45.70 | 49.02 | 40.13 | 47.97 | 44.57 | 53.39 |
| 27 | 28.27 | 25.95 | 22.88 | 22.90 | 32.51 | 31.21 | 31.77 | 30.36 | 54.20 | 45.80 | 49.01 | 40.05 | 48.29 | 44.53 | 53.83 |
| 28 | 28.21 | 25.77 | 22.98 | 23.04 | 32.18 | 30.88 | 32.20 | 30.68 | 54.00 | 46.00 | 49.25 | 39.97 | 48.84 | 44.61 | 53.78 |
| 29 | 28.20 | 25.95 | 22.95 | 22.91 | 32.22 | 31.22 | 31.99 | 30.44 | 54.10 | 45.90 | 49.00 | 40.06 | 48.51 | 44.53 | 53.89 |
| 30 | 28.30 | 26.10 | 22.63 | 22.97 | 32.77 | 31.68 | 30.92 | 30.49 | 54.40 | 45.60 | 49.20 | 39.80 | 47.78 | 44.50 | 54.17 |
| 31 | 28.01 | 26.05 | 23.14 | 22.80 | 31.02 | 31.90 | 33.17 | 29.83 | 54.10 | 45.90 | 48.99 | 40.03 | 48.78 | 44.51 | 53.22 |
| 32 | 27.99 | 26.08 | 23.10 | 22.82 | 31.19 | 31.91 | 32.96 | 29.74 | 54.10 | 45.90 | 48.97 | 40.17 | 48.62 | 44.57 | 53.42 |
| 33 | 28.16 | 26.04 | 22.94 | 22.86 | 31.86 | 31.43 | 32.41 | 30.31 | 54.20 | 45.80 | 49.04 | 39.68 | 48.67 | 44.36 | 53.95 |
| 34 | 28.15 | 25.79 | 23.04 | 23.01 | 32.08 | 31.04 | 32.28 | 30.50 | 53.90 | 46.10 | 49.35 | 40.04 | 48.77 | 44.69 | 53.85 |
| 35 | 28.34 | 26.57 | 22.57 | 22.52 | 32.34 | 33.48 | 31.22 | 28.96 | 54.90 | 45.10 | 49.23 | 39.44 | 46.60 | 44.34 | 53.50 |
| 36 | 28.11 | 25.79 | 23.07 | 23.02 | 31.97 | 31.03 | 32.39 | 30.49 | 53.90 | 46.10 | 49.35 | 40.07 | 48.85 | 44.71 | 53.79 |
| 37 | 28.22 | 25.91 | 22.92 | 22.96 | 32.22 | 31.12 | 31.96 | 30.58 | 54.10 | 45.90 | 48.97 | 40.06 | 48.59 | 44.52 | 53.84 |
| 38 | 28.13 | 25.83 | 23.00 | 23.04 | 31.99 | 31.01 | 32.13 | 30.70 | 54.00 | 46.00 | 49.14 | 40.12 | 48.85 | 44.63 | 53.67 |
| 39 | 28.17 | 26.08 | 23.01 | 22.74 | 31.70 | 31.82 | 32.72 | 29.68 | 54.20 | 45.80 | 48.93 | 39.98 | 48.35 | 44.45 | 53.19 |
| 40 | 28.19 | 25.79 | 23.00 | 23.02 | 32.16 | 30.98 | 32.25 | 30.53 | 54.00 | 46.00 | 49.26 | 40.04 | 48.77 | 44.65 | 53.83 |
| 41 | 28.27 | 25.95 | 22.90 | 22.88 | 32.51 | 31.21 | 31.77 | 30.36 | 54.20 | 45.80 | 49.01 | 40.05 | 48.29 | 44.53 | 53.85 |
| 42 | 28.15 | 25.91 | 23.00 | 22.95 | 32.07 | 31.19 | 32.10 | 30.51 | 54.10 | 45.90 | 49.12 | 40.06 | 48.65 | 44.59 | 53.79 |
| 43 | 28.20 | 25.97 | 22.96 | 22.88 | 32.02 | 31.29 | 32.41 | 30.31 | 54.20 | 45.80 | 49.10 | 39.75 | 48.67 | 44.42 | 53.91 |
| 44 | 28.10 | 26.15 | 22.87 | 22.87 | 31.35 | 31.98 | 32.41 | 30.45 | 54.30 | 45.70 | 49.16 | 39.47 | 48.61 | 44.32 | 54.02 |
| 45 | 28.36 | 26.24 | 22.43 | 22.97 | 32.27 | 32.37 | 30.70 | 30.56 | 54.60 | 45.40 | 49.07 | 39.59 | 47.54 | 44.33 | 53.83 |
| 46 | 28.23 | 25.87 | 23.00 | 22.89 | 32.24 | 31.27 | 32.26 | 30.18 | 54.10 | 45.90 | 49.28 | 39.94 | 48.46 | 44.61 | 53.64 |
| 47 | 28.52 | 26.09 | 22.63 | 22.75 | 32.77 | 31.84 | 31.37 | 30.06 | 54.60 | 45.40 | 48.71 | 39.81 | 47.64 | 44.26 | 53.80 |

|    |       |       |       |       |       |       |       |       |       |       |       |       |       |       |       |
|----|-------|-------|-------|-------|-------|-------|-------|-------|-------|-------|-------|-------|-------|-------|-------|
| 48 | 28.03 | 25.85 | 23.09 | 23.03 | 31.35 | 31.31 | 32.98 | 30.19 | 53.90 | 46.10 | 49.19 | 40.16 | 49.02 | 44.67 | 53.81 |
| 49 | 28.19 | 26.12 | 22.89 | 22.80 | 31.51 | 32.02 | 32.24 | 30.31 | 54.30 | 45.70 | 49.06 | 39.55 | 48.48 | 44.31 | 53.82 |
| 50 | 28.06 | 26.60 | 23.03 | 22.31 | 31.56 | 33.88 | 32.03 | 28.49 | 54.70 | 45.30 | 49.27 | 39.94 | 46.81 | 44.61 | 53.99 |
| 51 | 28.22 | 26.19 | 22.85 | 22.75 | 32.06 | 32.60 | 32.04 | 29.14 | 54.40 | 45.60 | 49.19 | 40.18 | 47.42 | 44.68 | 53.52 |
| 52 | 28.15 | 25.78 | 23.04 | 23.03 | 32.04 | 30.98 | 32.32 | 30.57 | 53.90 | 46.10 | 49.32 | 40.04 | 48.85 | 44.68 | 53.85 |
| 53 | 28.01 | 26.26 | 23.09 | 22.63 | 31.24 | 32.37 | 32.79 | 29.58 | 54.30 | 45.70 | 49.16 | 39.69 | 48.32 | 44.42 | 53.71 |
| 54 | 28.16 | 25.79 | 23.03 | 23.02 | 32.13 | 30.98 | 32.20 | 30.57 | 54.00 | 46.00 | 49.27 | 40.08 | 48.78 | 44.68 | 53.95 |
| 55 | 28.17 | 25.78 | 23.02 | 23.03 | 32.07 | 31.06 | 32.25 | 30.52 | 53.90 | 46.10 | 49.32 | 40.07 | 48.77 | 44.69 | 53.88 |
| 56 | 28.27 | 25.95 | 22.90 | 22.88 | 32.47 | 31.21 | 31.81 | 30.36 | 54.20 | 45.80 | 48.98 | 40.05 | 48.32 | 44.52 | 53.85 |
| 57 | 28.44 | 25.93 | 22.44 | 23.19 | 32.43 | 31.69 | 30.65 | 31.08 | 54.40 | 45.60 | 49.06 | 39.81 | 48.02 | 44.44 | 53.30 |
| 58 | 28.19 | 25.78 | 23.01 | 23.02 | 32.12 | 30.98 | 32.29 | 30.53 | 54.00 | 46.00 | 49.26 | 40.04 | 48.80 | 44.65 | 53.83 |
| 59 | 28.23 | 25.89 | 22.92 | 22.96 | 32.02 | 31.03 | 32.36 | 30.63 | 54.10 | 45.90 | 49.06 | 39.70 | 48.88 | 44.38 | 53.80 |
| 60 | 28.16 | 25.80 | 23.03 | 23.00 | 32.04 | 31.08 | 32.33 | 30.47 | 54.00 | 46.00 | 49.29 | 40.04 | 48.77 | 44.67 | 53.84 |
| 61 | 28.18 | 25.81 | 22.98 | 23.03 | 32.02 | 31.04 | 32.11 | 30.64 | 54.00 | 46.00 | 49.14 | 40.09 | 48.80 | 44.62 | 53.61 |
| 62 | 28.28 | 25.96 | 22.89 | 22.87 | 32.47 | 31.22 | 31.81 | 30.37 | 54.20 | 45.80 | 48.98 | 39.99 | 48.32 | 44.49 | 53.86 |
| 63 | 28.09 | 26.32 | 22.87 | 22.72 | 31.60 | 32.62 | 31.82 | 29.73 | 54.40 | 45.60 | 49.12 | 39.86 | 47.79 | 44.49 | 53.86 |
| 64 | 28.25 | 25.95 | 22.92 | 22.88 | 32.43 | 31.21 | 31.85 | 30.36 | 54.20 | 45.80 | 49.01 | 40.05 | 48.35 | 44.53 | 53.86 |
| 65 | 28.26 | 26.25 | 22.57 | 22.92 | 31.74 | 32.17 | 31.40 | 30.74 | 54.50 | 45.50 | 48.91 | 39.34 | 48.22 | 44.13 | 54.12 |
| 66 | 28.26 | 25.95 | 22.91 | 22.88 | 32.47 | 31.21 | 31.81 | 30.36 | 54.20 | 45.80 | 49.01 | 40.05 | 48.32 | 44.53 | 53.86 |
| 67 | 28.18 | 25.80 | 23.01 | 23.00 | 32.11 | 30.97 | 32.33 | 30.52 | 54.00 | 46.00 | 49.25 | 40.00 | 48.81 | 44.62 | 53.86 |
| 68 | 28.18 | 25.93 | 22.96 | 22.94 | 32.22 | 31.18 | 31.98 | 30.47 | 54.10 | 45.90 | 49.09 | 40.06 | 48.53 | 44.57 | 53.77 |
| 69 | 28.29 | 26.03 | 22.81 | 22.87 | 32.42 | 31.27 | 31.76 | 30.42 | 54.30 | 45.70 | 48.89 | 39.82 | 48.33 | 44.35 | 53.44 |
| 70 | 28.38 | 26.11 | 22.50 | 23.01 | 33.11 | 31.54 | 30.53 | 30.76 | 54.50 | 45.50 | 49.35 | 39.49 | 47.69 | 44.42 | 53.89 |
| 71 | 28.43 | 25.81 | 22.56 | 23.20 | 33.02 | 30.86 | 30.72 | 31.30 | 54.20 | 45.80 | 49.15 | 39.84 | 48.30 | 44.49 | 53.50 |
| 72 | 28.18 | 25.76 | 22.99 | 23.07 | 32.07 | 30.89 | 32.28 | 30.72 | 53.90 | 46.10 | 49.30 | 39.94 | 48.93 | 44.62 | 53.84 |

|    |       |       |       |       |       |       |       |       |       |       |       |       |       |       |       |
|----|-------|-------|-------|-------|-------|-------|-------|-------|-------|-------|-------|-------|-------|-------|-------|
| 73 | 28.19 | 25.88 | 22.96 | 22.97 | 32.12 | 31.08 | 32.06 | 30.64 | 54.10 | 45.90 | 49.04 | 40.02 | 48.72 | 44.53 | 53.61 |
| 74 | 28.15 | 25.89 | 22.99 | 22.98 | 31.62 | 31.45 | 32.74 | 30.06 | 54.00 | 46.00 | 49.12 | 40.08 | 48.71 | 44.60 | 53.29 |
| 75 | 28.19 | 25.97 | 22.97 | 22.88 | 31.98 | 31.29 | 32.46 | 30.31 | 54.20 | 45.80 | 49.10 | 39.75 | 48.70 | 44.42 | 53.91 |
| 76 | 28.15 | 25.79 | 23.04 | 23.01 | 32.01 | 31.04 | 32.37 | 30.50 | 53.90 | 46.10 | 49.29 | 40.04 | 48.83 | 44.67 | 53.83 |
| 77 | 28.23 | 25.86 | 22.95 | 22.97 | 32.31 | 31.21 | 32.03 | 30.36 | 54.10 | 45.90 | 49.30 | 39.97 | 48.46 | 44.64 | 53.86 |
| 78 | 28.19 | 25.85 | 22.96 | 23.00 | 32.21 | 31.11 | 31.94 | 30.57 | 54.00 | 46.00 | 49.19 | 40.08 | 48.61 | 44.63 | 53.68 |
| 79 | 28.34 | 26.30 | 22.67 | 22.69 | 32.56 | 32.29 | 31.20 | 29.92 | 54.60 | 45.40 | 49.19 | 39.49 | 47.39 | 44.34 | 53.52 |
| 80 | 27.96 | 26.61 | 22.92 | 22.51 | 31.58 | 33.18 | 31.79 | 29.07 | 54.60 | 45.40 | 48.87 | 40.19 | 47.25 | 44.53 | 54.02 |
| 81 | 28.45 | 25.88 | 22.45 | 23.23 | 32.42 | 31.33 | 30.81 | 31.36 | 54.30 | 45.70 | 48.91 | 39.79 | 48.33 | 44.35 | 53.73 |
| 82 | 28.23 | 26.19 | 22.76 | 22.81 | 32.24 | 32.05 | 31.56 | 30.04 | 54.40 | 45.60 | 48.96 | 39.94 | 47.83 | 44.45 | 54.04 |
| 83 | 28.21 | 25.78 | 22.97 | 23.04 | 32.13 | 30.97 | 32.21 | 30.63 | 54.00 | 46.00 | 49.25 | 39.97 | 48.81 | 44.61 | 53.77 |
| 84 | 28.31 | 26.03 | 22.72 | 22.94 | 32.61 | 31.79 | 31.29 | 30.19 | 54.30 | 45.70 | 49.38 | 39.84 | 47.78 | 44.61 | 53.79 |
| 85 | 28.16 | 25.79 | 23.03 | 23.02 | 32.08 | 31.01 | 32.28 | 30.53 | 53.90 | 46.10 | 49.32 | 40.04 | 48.80 | 44.68 | 53.84 |
| 86 | 28.17 | 25.79 | 23.02 | 23.01 | 32.08 | 30.94 | 32.33 | 30.57 | 54.00 | 46.00 | 49.23 | 40.01 | 48.85 | 44.62 | 53.86 |
| 87 | 28.23 | 25.74 | 22.98 | 23.05 | 32.26 | 30.82 | 32.21 | 30.65 | 54.00 | 46.00 | 49.19 | 40.05 | 48.84 | 44.62 | 53.74 |
| 88 | 28.25 | 25.78 | 22.93 | 23.04 | 32.33 | 31.05 | 31.99 | 30.54 | 54.00 | 46.00 | 49.36 | 39.97 | 48.58 | 44.67 | 53.69 |
| 89 | 28.18 | 25.80 | 23.00 | 23.01 | 32.08 | 30.98 | 32.29 | 30.57 | 54.00 | 46.00 | 49.20 | 40.01 | 48.83 | 44.61 | 53.83 |
| 90 | 28.34 | 26.46 | 22.74 | 22.45 | 32.58 | 32.92 | 31.36 | 29.11 | 54.80 | 45.20 | 49.28 | 39.45 | 46.87 | 44.36 | 53.37 |
| 91 | 28.19 | 25.91 | 22.96 | 22.95 | 32.22 | 31.17 | 31.98 | 30.52 | 54.10 | 45.90 | 49.09 | 40.06 | 48.56 | 44.57 | 53.73 |
| 92 | 28.47 | 26.28 | 22.61 | 22.64 | 32.86 | 32.47 | 31.09 | 29.59 | 54.70 | 45.30 | 49.22 | 39.52 | 47.02 | 44.37 | 53.40 |
| 93 | 28.15 | 25.80 | 23.04 | 23.00 | 32.01 | 31.08 | 32.37 | 30.47 | 54.00 | 46.00 | 49.29 | 40.04 | 48.80 | 44.67 | 53.84 |
| 94 | 28.24 | 26.31 | 22.55 | 22.90 | 31.57 | 32.39 | 31.47 | 30.68 | 54.50 | 45.50 | 48.91 | 39.25 | 48.19 | 44.08 | 53.91 |
| 95 | 28.37 | 26.04 | 22.55 | 23.04 | 33.02 | 31.45 | 30.35 | 31.01 | 54.40 | 45.60 | 49.30 | 39.68 | 47.80 | 44.49 | 53.52 |
| 96 | 28.16 | 26.49 | 22.89 | 22.46 | 31.68 | 32.94 | 32.22 | 29.16 | 54.70 | 45.30 | 48.91 | 39.61 | 47.52 | 44.26 | 53.47 |
| 97 | 28.26 | 25.97 | 22.91 | 22.86 | 32.47 | 31.28 | 31.81 | 30.30 | 54.20 | 45.80 | 49.01 | 40.05 | 48.26 | 44.53 | 53.84 |

|     |       |       |       |       |       |       |       |       |       |       |       |       |       |       |       |
|-----|-------|-------|-------|-------|-------|-------|-------|-------|-------|-------|-------|-------|-------|-------|-------|
| 98  | 28.19 | 25.95 | 22.97 | 22.89 | 31.98 | 31.23 | 32.46 | 30.38 | 54.10 | 45.90 | 49.10 | 39.75 | 48.75 | 44.42 | 53.90 |
| 99  | 28.21 | 25.93 | 22.92 | 22.95 | 32.26 | 31.22 | 31.85 | 30.51 | 54.10 | 45.90 | 49.06 | 40.06 | 48.48 | 44.56 | 53.87 |
| 100 | 28.20 | 25.88 | 22.67 | 23.25 | 32.44 | 31.02 | 31.30 | 31.26 | 54.10 | 45.90 | 49.42 | 39.68 | 48.64 | 44.55 | 54.45 |
| 101 | 28.26 | 25.94 | 22.91 | 22.89 | 32.43 | 31.18 | 31.85 | 30.40 | 54.20 | 45.80 | 48.98 | 40.05 | 48.38 | 44.52 | 53.87 |
| 102 | 28.44 | 26.38 | 22.57 | 22.60 | 33.32 | 32.54 | 30.83 | 29.16 | 54.80 | 45.20 | 49.04 | 39.90 | 46.58 | 44.47 | 53.78 |
| 103 | 28.17 | 26.06 | 22.84 | 22.93 | 32.29 | 31.96 | 31.54 | 29.96 | 54.20 | 45.80 | 49.38 | 40.10 | 47.84 | 44.74 | 53.96 |
| 104 | 28.45 | 26.10 | 22.65 | 22.80 | 33.48 | 31.74 | 30.69 | 29.90 | 54.60 | 45.40 | 49.29 | 39.91 | 47.15 | 44.60 | 54.02 |
| 105 | 28.45 | 26.09 | 22.58 | 22.88 | 32.75 | 31.97 | 30.84 | 30.24 | 54.50 | 45.50 | 49.20 | 39.68 | 47.50 | 44.44 | 53.46 |
| 106 | 28.47 | 26.02 | 22.54 | 22.97 | 33.21 | 31.82 | 30.64 | 30.25 | 54.50 | 45.50 | 49.32 | 39.87 | 47.35 | 44.60 | 53.45 |
| 107 | 28.37 | 26.41 | 22.62 | 22.61 | 32.17 | 32.82 | 31.74 | 29.49 | 54.80 | 45.20 | 48.68 | 39.61 | 47.38 | 44.14 | 53.56 |
| 108 | 28.35 | 26.46 | 22.62 | 22.57 | 32.16 | 33.02 | 31.76 | 29.27 | 54.80 | 45.20 | 48.72 | 39.62 | 47.22 | 44.17 | 53.58 |
| 109 | 28.38 | 26.37 | 22.62 | 22.64 | 32.22 | 32.73 | 31.75 | 29.56 | 54.70 | 45.30 | 48.80 | 39.55 | 47.43 | 44.17 | 53.57 |
| 110 | 28.52 | 26.51 | 22.53 | 22.44 | 32.85 | 33.14 | 31.28 | 28.92 | 55.00 | 45.00 | 48.75 | 39.59 | 46.58 | 44.17 | 53.33 |
| 111 | 28.54 | 26.20 | 22.55 | 22.71 | 32.83 | 32.34 | 31.45 | 29.65 | 54.70 | 45.30 | 48.98 | 39.50 | 47.30 | 44.24 | 53.27 |
| 112 | 28.39 | 26.52 | 22.61 | 22.49 | 32.21 | 33.17 | 31.75 | 29.12 | 54.90 | 45.10 | 48.68 | 39.55 | 47.06 | 44.11 | 53.46 |
| 113 | 28.35 | 26.35 | 22.65 | 22.64 | 32.27 | 32.69 | 31.82 | 29.45 | 54.70 | 45.30 | 48.87 | 39.59 | 47.42 | 44.23 | 53.37 |
| 114 | 28.35 | 25.84 | 22.66 | 23.15 | 33.15 | 30.77 | 30.95 | 30.94 | 54.20 | 45.80 | 49.19 | 40.01 | 48.23 | 44.60 | 54.01 |
| 115 | 28.37 | 25.83 | 22.66 | 23.14 | 33.22 | 30.73 | 30.95 | 30.90 | 54.20 | 45.80 | 49.19 | 40.01 | 48.20 | 44.60 | 54.03 |
| 116 | 28.45 | 25.90 | 22.62 | 23.03 | 33.40 | 30.88 | 30.92 | 30.64 | 54.30 | 45.70 | 48.99 | 40.03 | 47.94 | 44.51 | 53.98 |
| 117 | 28.42 | 25.89 | 22.64 | 23.06 | 33.36 | 30.80 | 30.96 | 30.73 | 54.30 | 45.70 | 49.03 | 40.02 | 48.04 | 44.52 | 54.02 |
| 118 | 28.41 | 26.32 | 22.68 | 22.59 | 32.64 | 32.73 | 31.58 | 29.32 | 54.70 | 45.30 | 49.13 | 39.55 | 47.13 | 44.34 | 53.31 |
| 119 | 28.40 | 26.04 | 22.58 | 22.98 | 33.11 | 31.85 | 30.40 | 30.36 | 54.40 | 45.60 | 49.48 | 39.87 | 47.34 | 44.67 | 53.92 |
| 120 | 28.45 | 26.17 | 22.58 | 22.80 | 33.10 | 32.29 | 30.66 | 29.78 | 54.60 | 45.40 | 49.41 | 39.74 | 46.98 | 44.57 | 53.78 |
| 121 | 28.38 | 26.45 | 22.61 | 22.57 | 32.21 | 32.99 | 31.69 | 29.32 | 54.80 | 45.20 | 48.71 | 39.61 | 47.20 | 44.16 | 53.46 |
| 122 | 28.38 | 25.71 | 22.89 | 23.02 | 32.82 | 30.59 | 32.17 | 30.39 | 54.10 | 45.90 | 49.20 | 39.93 | 48.59 | 44.57 | 54.57 |

|     |       |       |       |       |       |       |       |       |       |       |       |       |       |       |       |
|-----|-------|-------|-------|-------|-------|-------|-------|-------|-------|-------|-------|-------|-------|-------|-------|
| 123 | 28.21 | 26.29 | 22.81 | 22.70 | 32.71 | 32.42 | 31.46 | 29.16 | 54.50 | 45.50 | 49.38 | 40.02 | 47.12 | 44.70 | 53.66 |
| 124 | 28.34 | 26.44 | 22.62 | 22.61 | 32.06 | 33.02 | 31.74 | 29.37 | 54.80 | 45.20 | 48.77 | 39.61 | 47.29 | 44.19 | 53.52 |
| 125 | 28.15 | 25.87 | 22.80 | 23.17 | 32.37 | 31.40 | 31.54 | 30.48 | 54.00 | 46.00 | 49.62 | 40.00 | 48.29 | 44.81 | 54.45 |
| 126 | 28.23 | 25.86 | 22.80 | 23.12 | 32.67 | 31.35 | 31.30 | 30.40 | 54.10 | 45.90 | 49.62 | 40.06 | 48.06 | 44.84 | 54.08 |
| 127 | 28.24 | 25.80 | 22.79 | 23.16 | 32.78 | 31.29 | 31.17 | 30.44 | 54.00 | 46.00 | 49.71 | 40.12 | 48.00 | 44.92 | 54.02 |
| 128 | 28.25 | 25.73 | 22.81 | 23.22 | 32.71 | 31.07 | 31.24 | 30.63 | 54.00 | 46.00 | 49.72 | 40.11 | 48.25 | 44.92 | 54.02 |
| 129 | 28.42 | 26.07 | 22.38 | 23.13 | 33.21 | 31.63 | 30.00 | 30.95 | 54.50 | 45.50 | 49.22 | 39.80 | 47.51 | 44.51 | 53.83 |
| 130 | 28.53 | 26.41 | 22.60 | 22.46 | 32.73 | 32.79 | 31.75 | 29.14 | 54.90 | 45.10 | 48.77 | 39.37 | 47.03 | 44.07 | 53.57 |
| 131 | 28.36 | 26.34 | 22.67 | 22.63 | 32.29 | 32.65 | 31.85 | 29.39 | 54.70 | 45.30 | 48.85 | 39.66 | 47.41 | 44.26 | 53.36 |
| 132 | 28.27 | 26.16 | 22.82 | 22.75 | 32.43 | 32.19 | 31.42 | 29.74 | 54.40 | 45.60 | 49.35 | 39.82 | 47.55 | 44.58 | 54.72 |
| 133 | 28.30 | 26.28 | 22.67 | 22.76 | 32.91 | 32.13 | 31.10 | 29.69 | 54.60 | 45.40 | 49.04 | 39.98 | 47.25 | 44.51 | 53.99 |
| 134 | 28.36 | 25.78 | 22.67 | 23.19 | 33.03 | 30.90 | 31.10 | 30.90 | 54.10 | 45.90 | 49.42 | 39.92 | 48.23 | 44.67 | 54.40 |
| 135 | 28.31 | 26.37 | 22.64 | 22.68 | 32.42 | 32.14 | 31.55 | 29.86 | 54.70 | 45.30 | 48.58 | 39.73 | 47.65 | 44.16 | 54.13 |
| 136 | 28.62 | 25.94 | 22.47 | 22.97 | 33.90 | 31.23 | 30.28 | 30.41 | 54.60 | 45.40 | 49.13 | 39.90 | 47.28 | 44.51 | 53.77 |
| 137 | 28.45 | 26.07 | 22.51 | 22.97 | 33.36 | 31.69 | 30.37 | 30.37 | 54.50 | 45.50 | 49.22 | 39.91 | 47.30 | 44.57 | 53.66 |
| 138 | 28.24 | 25.80 | 22.80 | 23.16 | 32.38 | 30.84 | 31.74 | 31.04 | 54.00 | 46.00 | 49.15 | 39.90 | 48.83 | 44.52 | 54.23 |
| 139 | 28.00 | 26.15 | 22.98 | 22.87 | 30.81 | 31.88 | 33.20 | 30.39 | 54.20 | 45.80 | 48.80 | 39.58 | 49.17 | 44.19 | 53.57 |
| 140 | 28.04 | 26.13 | 23.02 | 22.78 | 31.00 | 32.01 | 33.24 | 30.03 | 54.20 | 45.80 | 48.84 | 39.68 | 48.90 | 44.26 | 53.70 |
| 141 | 28.44 | 26.30 | 22.63 | 22.63 | 32.84 | 32.45 | 31.56 | 29.23 | 54.70 | 45.30 | 48.77 | 39.89 | 47.11 | 44.33 | 53.85 |
| 142 | 28.37 | 25.73 | 22.84 | 23.06 | 32.74 | 30.65 | 31.92 | 30.68 | 54.10 | 45.90 | 49.26 | 39.81 | 48.62 | 44.54 | 54.62 |
| 143 | 28.40 | 26.37 | 22.57 | 22.65 | 32.40 | 32.71 | 31.50 | 29.54 | 54.80 | 45.20 | 48.71 | 39.66 | 47.29 | 44.19 | 53.62 |
| 144 | 28.30 | 26.46 | 22.71 | 22.53 | 32.00 | 33.13 | 31.90 | 29.25 | 54.80 | 45.20 | 48.87 | 39.57 | 47.28 | 44.22 | 53.44 |
| 145 | 28.29 | 26.17 | 22.73 | 22.80 | 32.86 | 32.17 | 31.14 | 29.56 | 54.50 | 45.50 | 49.35 | 40.05 | 47.21 | 44.70 | 53.51 |
| 146 | 28.42 | 26.32 | 22.48 | 22.79 | 33.20 | 32.96 | 30.35 | 29.32 | 54.70 | 45.30 | 49.80 | 39.64 | 46.35 | 44.72 | 54.56 |
| 147 | 28.10 | 25.53 | 22.93 | 23.44 | 31.00 | 30.57 | 32.87 | 31.52 | 53.60 | 46.40 | 48.97 | 40.13 | 50.01 | 44.55 | 53.99 |

|     |       |       |       |       |       |       |       |       |       |       |       |       |       |       |       |
|-----|-------|-------|-------|-------|-------|-------|-------|-------|-------|-------|-------|-------|-------|-------|-------|
| 148 | 27.68 | 25.64 | 23.32 | 23.37 | 30.49 | 30.68 | 33.44 | 31.32 | 53.30 | 46.70 | 49.74 | 40.02 | 50.29 | 44.88 | 53.89 |
| 149 | 28.21 | 26.19 | 22.77 | 22.83 | 31.62 | 32.15 | 32.81 | 29.84 | 54.40 | 45.60 | 48.97 | 39.46 | 48.36 | 44.22 | 53.24 |
| 150 | 28.31 | 26.20 | 22.71 | 22.79 | 31.98 | 32.07 | 32.53 | 29.83 | 54.50 | 45.50 | 48.96 | 39.39 | 48.14 | 44.17 | 53.30 |
| 151 | 28.14 | 26.27 | 22.84 | 22.74 | 31.34 | 32.41 | 33.02 | 29.69 | 54.40 | 45.60 | 49.00 | 39.40 | 48.36 | 44.20 | 53.39 |
| 152 | 28.74 | 26.18 | 22.42 | 22.65 | 33.22 | 32.17 | 31.26 | 29.65 | 54.90 | 45.10 | 48.65 | 39.49 | 47.09 | 44.07 | 53.19 |
| 153 | 28.39 | 26.18 | 22.80 | 22.63 | 32.29 | 31.93 | 32.51 | 29.58 | 54.60 | 45.40 | 48.87 | 39.42 | 48.00 | 44.14 | 53.88 |
| 154 | 28.46 | 26.27 | 22.72 | 22.54 | 32.55 | 32.20 | 32.26 | 29.28 | 54.70 | 45.30 | 48.87 | 39.36 | 47.57 | 44.12 | 53.83 |
| 155 | 28.40 | 26.02 | 22.73 | 22.84 | 32.23 | 31.35 | 32.31 | 30.53 | 54.40 | 45.60 | 48.88 | 39.22 | 48.62 | 44.05 | 54.43 |
| 156 | 28.44 | 26.15 | 22.66 | 22.74 | 32.69 | 31.99 | 31.38 | 29.84 | 54.60 | 45.40 | 48.80 | 39.90 | 47.52 | 44.35 | 53.36 |
| 157 | 28.46 | 26.25 | 22.61 | 22.68 | 32.79 | 32.27 | 31.12 | 29.68 | 54.70 | 45.30 | 48.74 | 39.92 | 47.20 | 44.33 | 53.34 |
| 158 | 28.52 | 26.24 | 22.57 | 22.67 | 33.02 | 32.19 | 30.96 | 29.67 | 54.80 | 45.20 | 48.71 | 39.92 | 47.09 | 44.32 | 53.20 |
| 159 | 28.54 | 26.25 | 22.55 | 22.66 | 33.04 | 32.11 | 30.98 | 29.80 | 54.80 | 45.20 | 48.62 | 39.84 | 47.17 | 44.23 | 53.36 |
| 160 | 28.22 | 26.16 | 22.74 | 22.87 | 31.72 | 32.11 | 31.69 | 30.50 | 54.40 | 45.60 | 48.96 | 39.65 | 48.23 | 44.30 | 53.77 |
| 161 | 28.23 | 26.25 | 22.71 | 22.81 | 31.79 | 32.37 | 31.47 | 30.32 | 54.50 | 45.50 | 48.96 | 39.65 | 47.94 | 44.30 | 53.70 |
| 162 | 28.31 | 25.77 | 22.68 | 23.24 | 32.78 | 30.50 | 30.95 | 31.62 | 54.10 | 45.90 | 49.09 | 39.90 | 48.77 | 44.49 | 53.51 |
| 163 | 28.04 | 26.41 | 22.91 | 22.64 | 31.50 | 32.82 | 31.90 | 29.55 | 54.40 | 45.60 | 49.04 | 39.90 | 47.71 | 44.47 | 53.93 |
| 164 | 28.21 | 26.56 | 22.61 | 22.61 | 32.10 | 33.51 | 30.93 | 29.16 | 54.80 | 45.20 | 49.03 | 40.00 | 46.66 | 44.52 | 53.66 |
| 165 | 27.97 | 26.40 | 23.00 | 22.63 | 31.18 | 32.83 | 32.24 | 29.53 | 54.40 | 45.60 | 49.07 | 39.87 | 47.94 | 44.47 | 53.85 |
| 166 | 28.33 | 26.56 | 22.62 | 22.49 | 32.49 | 33.13 | 30.97 | 29.15 | 54.90 | 45.10 | 48.77 | 39.88 | 46.69 | 44.33 | 53.87 |
| 167 | 28.43 | 25.70 | 22.66 | 23.20 | 33.57 | 30.30 | 30.79 | 31.18 | 54.10 | 45.90 | 49.39 | 39.89 | 48.32 | 44.64 | 53.96 |
| 168 | 28.16 | 25.97 | 22.86 | 23.01 | 32.43 | 31.52 | 31.60 | 30.20 | 54.10 | 45.90 | 49.46 | 40.05 | 48.10 | 44.76 | 54.08 |
| 169 | 28.31 | 26.43 | 22.65 | 22.59 | 32.06 | 32.91 | 31.82 | 29.40 | 54.80 | 45.20 | 48.75 | 39.62 | 47.33 | 44.19 | 53.49 |
| 170 | 28.35 | 26.42 | 22.61 | 22.60 | 32.19 | 32.88 | 31.71 | 29.44 | 54.80 | 45.20 | 48.75 | 39.59 | 47.28 | 44.17 | 53.48 |
| 171 | 28.43 | 25.80 | 22.60 | 23.17 | 33.12 | 30.69 | 30.92 | 31.24 | 54.20 | 45.80 | 49.15 | 39.79 | 48.39 | 44.47 | 54.03 |
| 172 | 28.44 | 25.80 | 22.60 | 23.16 | 33.16 | 30.69 | 30.92 | 31.20 | 54.20 | 45.80 | 49.15 | 39.79 | 48.36 | 44.47 | 54.03 |

|     |       |       |       |       |       |       |       |       |       |       |       |       |       |       |       |
|-----|-------|-------|-------|-------|-------|-------|-------|-------|-------|-------|-------|-------|-------|-------|-------|
| 173 | 28.27 | 25.85 | 22.75 | 23.13 | 32.60 | 30.97 | 31.60 | 30.83 | 54.10 | 45.90 | 49.26 | 39.84 | 48.54 | 44.55 | 54.06 |
| 174 | 28.30 | 25.85 | 22.70 | 23.15 | 32.62 | 30.82 | 31.47 | 31.12 | 54.20 | 45.80 | 49.13 | 39.75 | 48.67 | 44.44 | 54.05 |
| 175 | 28.32 | 25.87 | 22.70 | 23.11 | 32.69 | 30.89 | 31.47 | 30.99 | 54.20 | 45.80 | 49.13 | 39.75 | 48.55 | 44.44 | 54.15 |
| 176 | 28.25 | 25.87 | 22.76 | 23.12 | 32.54 | 31.09 | 31.67 | 30.72 | 54.10 | 45.90 | 49.26 | 39.90 | 48.48 | 44.58 | 54.15 |
| 177 | 28.39 | 25.75 | 22.64 | 23.22 | 33.01 | 30.53 | 31.11 | 31.35 | 54.10 | 45.90 | 49.17 | 39.79 | 48.62 | 44.48 | 54.20 |
| 178 | 28.38 | 25.75 | 22.65 | 23.22 | 32.97 | 30.52 | 31.15 | 31.34 | 54.10 | 45.90 | 49.15 | 39.81 | 48.65 | 44.48 | 54.19 |
| 179 | 28.34 | 25.78 | 22.68 | 23.20 | 32.82 | 30.63 | 31.29 | 31.27 | 54.10 | 45.90 | 49.20 | 39.76 | 48.68 | 44.48 | 54.19 |
| 180 | 28.35 | 25.82 | 22.67 | 23.16 | 32.84 | 30.75 | 31.29 | 31.12 | 54.20 | 45.80 | 49.19 | 39.75 | 48.55 | 44.47 | 54.16 |
| 181 | 28.34 | 25.79 | 22.68 | 23.19 | 32.82 | 30.66 | 31.29 | 31.24 | 54.10 | 45.90 | 49.20 | 39.76 | 48.65 | 44.48 | 54.18 |
| 182 | 28.39 | 25.76 | 22.64 | 23.21 | 32.97 | 30.57 | 31.15 | 31.32 | 54.10 | 45.90 | 49.17 | 39.76 | 48.62 | 44.47 | 54.15 |
| 183 | 28.26 | 25.87 | 22.76 | 23.11 | 32.53 | 31.03 | 31.70 | 30.76 | 54.10 | 45.90 | 49.23 | 39.84 | 48.54 | 44.54 | 54.12 |
| 184 | 28.47 | 25.85 | 22.59 | 23.09 | 33.25 | 31.01 | 31.03 | 30.70 | 54.30 | 45.70 | 49.20 | 39.81 | 48.02 | 44.51 | 54.16 |
| 185 | 28.34 | 25.81 | 22.68 | 23.17 | 32.82 | 30.73 | 31.29 | 31.17 | 54.10 | 45.90 | 49.20 | 39.76 | 48.59 | 44.48 | 54.17 |
| 186 | 28.27 | 25.85 | 22.75 | 23.13 | 32.60 | 31.00 | 31.60 | 30.80 | 54.10 | 45.90 | 49.29 | 39.84 | 48.51 | 44.57 | 54.03 |
| 187 | 28.39 | 25.60 | 22.72 | 23.30 | 32.89 | 30.20 | 31.47 | 31.46 | 54.00 | 46.00 | 49.26 | 39.81 | 48.97 | 44.54 | 54.20 |
| 188 | 28.43 | 25.62 | 22.67 | 23.29 | 32.93 | 30.34 | 31.29 | 31.43 | 54.00 | 46.00 | 49.20 | 39.84 | 48.83 | 44.52 | 54.19 |
| 189 | 28.38 | 25.79 | 22.64 | 23.19 | 32.97 | 30.63 | 31.12 | 31.27 | 54.20 | 45.80 | 49.15 | 39.79 | 48.57 | 44.47 | 54.14 |
| 190 | 28.36 | 25.86 | 22.70 | 23.09 | 32.77 | 31.05 | 31.54 | 30.71 | 54.20 | 45.80 | 49.26 | 39.73 | 48.36 | 44.49 | 54.40 |
| 191 | 28.27 | 25.83 | 22.75 | 23.15 | 32.53 | 30.83 | 31.52 | 31.10 | 54.10 | 45.90 | 49.12 | 39.87 | 48.71 | 44.49 | 54.34 |
| 192 | 28.27 | 25.74 | 22.73 | 23.26 | 32.47 | 30.62 | 31.63 | 31.34 | 54.00 | 46.00 | 49.23 | 39.76 | 48.97 | 44.49 | 54.47 |
| 193 | 28.27 | 25.84 | 22.76 | 23.13 | 32.49 | 30.97 | 31.59 | 30.93 | 54.10 | 45.90 | 49.12 | 39.93 | 48.62 | 44.52 | 54.32 |
| 194 | 28.24 | 25.88 | 22.77 | 23.11 | 32.45 | 31.07 | 31.74 | 30.76 | 54.10 | 45.90 | 49.23 | 39.84 | 48.57 | 44.54 | 54.10 |
| 195 | 28.34 | 25.87 | 22.71 | 23.09 | 32.69 | 31.05 | 31.58 | 30.75 | 54.20 | 45.80 | 49.23 | 39.73 | 48.42 | 44.48 | 54.38 |
| 196 | 28.40 | 25.83 | 22.61 | 23.17 | 33.02 | 30.74 | 31.00 | 31.21 | 54.20 | 45.80 | 49.13 | 39.77 | 48.43 | 44.45 | 54.25 |
| 197 | 28.47 | 25.70 | 22.65 | 23.18 | 33.51 | 30.72 | 30.93 | 30.85 | 54.20 | 45.80 | 49.57 | 39.83 | 48.09 | 44.70 | 53.92 |



|     |       |       |       |       |       |       |       |       |       |       |       |       |       |       |       |
|-----|-------|-------|-------|-------|-------|-------|-------|-------|-------|-------|-------|-------|-------|-------|-------|
| 198 | 28.45 | 25.71 | 22.66 | 23.18 | 33.43 | 30.75 | 30.97 | 30.85 | 54.20 | 45.80 | 49.57 | 39.83 | 48.12 | 44.70 | 53.91 |
| 199 | 28.32 | 25.77 | 22.64 | 23.26 | 32.69 | 30.68 | 31.23 | 31.36 | 54.10 | 45.90 | 49.22 | 39.77 | 48.73 | 44.50 | 54.53 |
| 200 | 28.23 | 25.83 | 22.80 | 23.13 | 32.40 | 30.95 | 31.70 | 30.89 | 54.10 | 45.90 | 49.20 | 39.93 | 48.68 | 44.57 | 54.30 |
| 201 | 28.46 | 25.72 | 22.60 | 23.21 | 33.43 | 30.85 | 30.89 | 30.85 | 54.20 | 45.80 | 49.57 | 39.80 | 48.06 | 44.68 | 53.97 |
| 202 | 28.45 | 25.85 | 22.57 | 23.12 | 33.06 | 30.99 | 31.08 | 30.82 | 54.30 | 45.70 | 49.10 | 39.84 | 48.15 | 44.47 | 53.80 |
| 203 | 28.27 | 25.71 | 22.74 | 23.27 | 32.49 | 30.53 | 31.66 | 31.35 | 54.00 | 46.00 | 49.22 | 39.80 | 49.02 | 44.51 | 54.51 |
| 204 | 28.27 | 25.85 | 22.77 | 23.11 | 32.53 | 30.97 | 31.59 | 30.90 | 54.10 | 45.90 | 49.15 | 39.90 | 48.59 | 44.52 | 54.32 |
| 205 | 28.32 | 25.79 | 22.68 | 23.21 | 32.74 | 30.66 | 31.29 | 31.31 | 54.10 | 45.90 | 49.20 | 39.76 | 48.71 | 44.48 | 54.20 |
| 206 | 28.30 | 25.85 | 22.70 | 23.15 | 32.62 | 30.82 | 31.47 | 31.12 | 54.20 | 45.80 | 49.13 | 39.75 | 48.67 | 44.44 | 54.07 |
| 207 | 28.31 | 25.86 | 22.72 | 23.11 | 32.64 | 30.86 | 31.54 | 31.00 | 54.20 | 45.80 | 49.13 | 39.75 | 48.61 | 44.44 | 54.14 |
| 208 | 28.34 | 25.81 | 22.69 | 23.16 | 32.65 | 30.87 | 31.47 | 31.04 | 54.10 | 45.90 | 49.12 | 39.84 | 48.59 | 44.48 | 54.39 |
| 209 | 28.43 | 25.56 | 22.68 | 23.34 | 32.98 | 30.14 | 31.40 | 31.53 | 54.00 | 46.00 | 49.26 | 39.81 | 48.97 | 44.54 | 54.25 |
| 210 | 28.36 | 25.57 | 22.75 | 23.33 | 32.78 | 30.20 | 31.57 | 31.46 | 53.90 | 46.10 | 49.29 | 39.87 | 49.06 | 44.58 | 54.25 |
| 211 | 28.40 | 25.57 | 22.70 | 23.34 | 32.98 | 30.08 | 31.39 | 31.54 | 54.00 | 46.00 | 49.23 | 39.87 | 49.00 | 44.55 | 54.25 |
| 212 | 28.36 | 25.83 | 22.68 | 23.13 | 32.84 | 30.89 | 31.30 | 30.95 | 54.20 | 45.80 | 49.15 | 39.87 | 48.42 | 44.51 | 54.30 |
| 213 | 28.22 | 25.84 | 22.82 | 23.11 | 32.34 | 30.93 | 31.84 | 30.90 | 54.10 | 45.90 | 49.15 | 39.90 | 48.77 | 44.52 | 54.29 |
| 214 | 28.21 | 25.85 | 22.80 | 23.13 | 32.34 | 30.90 | 31.86 | 30.93 | 54.10 | 45.90 | 49.17 | 39.84 | 48.80 | 44.51 | 54.12 |
| 215 | 28.36 | 25.78 | 22.67 | 23.19 | 32.82 | 30.63 | 31.33 | 31.24 | 54.10 | 45.90 | 49.15 | 39.76 | 48.68 | 44.45 | 54.20 |
| 216 | 28.31 | 25.86 | 22.71 | 23.11 | 32.65 | 30.87 | 31.51 | 31.01 | 54.20 | 45.80 | 49.13 | 39.75 | 48.58 | 44.44 | 54.14 |
| 217 | 28.38 | 25.76 | 22.68 | 23.18 | 33.01 | 30.52 | 31.25 | 31.24 | 54.10 | 45.90 | 49.17 | 39.79 | 48.62 | 44.48 | 54.17 |
| 218 | 28.21 | 25.84 | 22.80 | 23.15 | 32.38 | 30.86 | 31.82 | 30.97 | 54.10 | 45.90 | 49.20 | 39.84 | 48.80 | 44.52 | 54.19 |
| 219 | 28.21 | 25.84 | 22.81 | 23.13 | 32.34 | 30.86 | 31.91 | 30.93 | 54.10 | 45.90 | 49.17 | 39.84 | 48.83 | 44.51 | 54.13 |
| 220 | 28.40 | 25.76 | 22.65 | 23.19 | 33.04 | 30.52 | 31.17 | 31.27 | 54.20 | 45.80 | 49.15 | 39.79 | 48.59 | 44.47 | 54.16 |
| 221 | 28.38 | 25.78 | 22.67 | 23.17 | 32.97 | 30.56 | 31.25 | 31.24 | 54.20 | 45.80 | 49.12 | 39.79 | 48.62 | 44.45 | 54.21 |
| 222 | 28.39 | 25.78 | 22.67 | 23.16 | 33.01 | 30.59 | 31.25 | 31.17 | 54.20 | 45.80 | 49.15 | 39.79 | 48.57 | 44.47 | 54.15 |

|     |       |       |       |       |       |       |       |       |       |       |       |       |       |       |       |
|-----|-------|-------|-------|-------|-------|-------|-------|-------|-------|-------|-------|-------|-------|-------|-------|
| 223 | 28.33 | 25.82 | 22.70 | 23.15 | 32.78 | 30.76 | 31.37 | 31.10 | 54.10 | 45.90 | 49.20 | 39.76 | 48.59 | 44.48 | 54.12 |
| 224 | 28.20 | 25.82 | 22.80 | 23.18 | 32.37 | 30.80 | 31.81 | 31.03 | 54.00 | 46.00 | 49.20 | 39.87 | 48.86 | 44.54 | 54.20 |
| 225 | 28.30 | 25.87 | 22.73 | 23.10 | 32.64 | 31.14 | 31.59 | 30.66 | 54.20 | 45.80 | 49.26 | 39.87 | 48.36 | 44.57 | 54.13 |
| 226 | 28.35 | 25.78 | 22.67 | 23.20 | 32.82 | 30.63 | 31.29 | 31.27 | 54.10 | 45.90 | 49.17 | 39.76 | 48.68 | 44.47 | 54.14 |
| 227 | 28.38 | 25.78 | 22.63 | 23.21 | 32.93 | 30.67 | 31.11 | 31.28 | 54.20 | 45.80 | 49.17 | 39.79 | 48.57 | 44.48 | 54.11 |
| 228 | 28.21 | 25.85 | 22.80 | 23.14 | 32.42 | 30.90 | 31.78 | 30.93 | 54.10 | 45.90 | 49.23 | 39.84 | 48.74 | 44.54 | 54.18 |
| 229 | 28.42 | 25.82 | 22.65 | 23.11 | 33.15 | 30.93 | 31.13 | 30.73 | 54.20 | 45.80 | 49.29 | 39.87 | 48.13 | 44.58 | 54.33 |
| 230 | 28.39 | 25.75 | 22.63 | 23.22 | 32.98 | 30.58 | 31.12 | 31.33 | 54.10 | 45.90 | 49.17 | 39.79 | 48.59 | 44.48 | 54.17 |
| 231 | 28.51 | 25.91 | 22.58 | 23.00 | 33.69 | 30.90 | 30.55 | 30.70 | 54.40 | 45.60 | 49.10 | 39.92 | 47.71 | 44.51 | 53.34 |
| 232 | 28.37 | 25.83 | 22.75 | 23.05 | 33.11 | 30.92 | 31.36 | 30.52 | 54.20 | 45.80 | 49.19 | 40.06 | 48.15 | 44.63 | 53.68 |
| 233 | 28.45 | 25.66 | 22.62 | 23.27 | 33.42 | 30.48 | 30.91 | 31.16 | 54.10 | 45.90 | 49.49 | 39.85 | 48.33 | 44.67 | 54.09 |
| 234 | 28.37 | 25.65 | 22.66 | 23.32 | 33.17 | 30.31 | 31.05 | 31.40 | 54.00 | 46.00 | 49.38 | 39.90 | 48.65 | 44.64 | 54.08 |
| 235 | 28.53 | 25.63 | 22.58 | 23.26 | 33.66 | 30.27 | 30.73 | 31.25 | 54.20 | 45.80 | 49.26 | 39.97 | 48.31 | 44.61 | 53.93 |
| 236 | 28.39 | 25.71 | 22.68 | 23.22 | 33.23 | 30.67 | 31.06 | 30.91 | 54.10 | 45.90 | 49.38 | 40.05 | 48.28 | 44.71 | 53.78 |
| 237 | 28.47 | 25.69 | 22.59 | 23.26 | 33.43 | 30.44 | 30.85 | 31.22 | 54.20 | 45.80 | 49.32 | 39.88 | 48.33 | 44.60 | 54.14 |
| 238 | 28.21 | 26.21 | 22.70 | 22.87 | 32.63 | 32.27 | 30.90 | 29.93 | 54.40 | 45.60 | 49.35 | 40.02 | 47.35 | 44.68 | 53.86 |
| 239 | 28.19 | 26.20 | 22.69 | 22.91 | 32.63 | 32.28 | 30.90 | 29.94 | 54.40 | 45.60 | 49.43 | 40.02 | 47.35 | 44.73 | 53.87 |
| 240 | 28.44 | 26.03 | 22.63 | 22.89 | 32.85 | 31.73 | 30.94 | 30.26 | 54.50 | 45.50 | 49.23 | 39.74 | 47.61 | 44.49 | 53.57 |
| 241 | 28.46 | 26.00 | 22.63 | 22.91 | 32.81 | 31.67 | 31.02 | 30.34 | 54.50 | 45.50 | 49.22 | 39.67 | 47.71 | 44.44 | 53.51 |
| 242 | 28.56 | 26.10 | 22.51 | 22.83 | 33.15 | 31.93 | 30.66 | 30.19 | 54.70 | 45.30 | 49.22 | 39.55 | 47.28 | 44.38 | 53.56 |
| 243 | 28.61 | 26.13 | 22.47 | 22.80 | 33.25 | 31.98 | 30.58 | 30.11 | 54.70 | 45.30 | 49.15 | 39.51 | 47.15 | 44.33 | 53.60 |
| 244 | 28.49 | 26.04 | 22.60 | 22.87 | 33.01 | 31.67 | 30.91 | 30.24 | 54.50 | 45.50 | 49.15 | 39.71 | 47.55 | 44.43 | 53.60 |
| 245 | 28.38 | 26.13 | 22.61 | 22.87 | 32.71 | 32.03 | 30.95 | 30.16 | 54.50 | 45.50 | 49.25 | 39.72 | 47.48 | 44.48 | 53.65 |
| 246 | 28.46 | 26.19 | 22.58 | 22.77 | 33.06 | 32.32 | 30.72 | 29.63 | 54.70 | 45.30 | 49.31 | 39.81 | 46.93 | 44.56 | 53.40 |
| 247 | 28.41 | 26.21 | 22.61 | 22.77 | 32.87 | 32.32 | 30.87 | 29.67 | 54.60 | 45.40 | 49.25 | 39.81 | 47.08 | 44.53 | 53.61 |

|     |       |       |       |       |       |       |       |       |       |       |       |       |       |       |       |
|-----|-------|-------|-------|-------|-------|-------|-------|-------|-------|-------|-------|-------|-------|-------|-------|
| 248 | 28.59 | 25.89 | 22.47 | 23.05 | 33.40 | 31.12 | 30.37 | 30.95 | 54.50 | 45.50 | 49.15 | 39.65 | 47.76 | 44.40 | 53.39 |
| 249 | 28.41 | 26.07 | 22.65 | 22.84 | 32.77 | 31.73 | 31.04 | 30.33 | 54.50 | 45.50 | 49.12 | 39.65 | 47.70 | 44.38 | 53.88 |
| 250 | 28.47 | 26.24 | 22.58 | 22.71 | 32.95 | 32.37 | 30.84 | 29.62 | 54.70 | 45.30 | 49.19 | 39.69 | 46.99 | 44.44 | 53.63 |
| 251 | 28.63 | 26.15 | 22.48 | 22.74 | 33.40 | 32.18 | 30.59 | 29.76 | 54.80 | 45.20 | 49.25 | 39.52 | 46.87 | 44.38 | 53.47 |
| 252 | 28.46 | 26.21 | 22.57 | 22.76 | 33.13 | 32.35 | 30.57 | 29.57 | 54.70 | 45.30 | 49.33 | 39.84 | 46.82 | 44.59 | 53.63 |
| 253 | 28.48 | 26.24 | 22.56 | 22.72 | 33.10 | 32.46 | 30.69 | 29.47 | 54.70 | 45.30 | 49.31 | 39.75 | 46.79 | 44.53 | 53.58 |
| 254 | 28.48 | 26.21 | 22.57 | 22.74 | 33.13 | 32.36 | 30.69 | 29.54 | 54.70 | 45.30 | 49.33 | 39.75 | 46.84 | 44.54 | 53.63 |
| 255 | 28.47 | 26.20 | 22.56 | 22.77 | 33.15 | 32.35 | 30.59 | 29.57 | 54.70 | 45.30 | 49.33 | 39.84 | 46.82 | 44.59 | 53.63 |
| 256 | 28.43 | 26.22 | 22.62 | 22.73 | 32.93 | 32.35 | 30.98 | 29.53 | 54.70 | 45.30 | 49.31 | 39.72 | 47.02 | 44.51 | 53.60 |
| 257 | 28.44 | 26.22 | 22.59 | 22.74 | 32.97 | 32.44 | 30.80 | 29.52 | 54.70 | 45.30 | 49.29 | 39.80 | 46.89 | 44.54 | 53.65 |
| 258 | 28.41 | 26.33 | 22.60 | 22.66 | 32.82 | 32.62 | 30.98 | 29.36 | 54.70 | 45.30 | 49.13 | 39.78 | 46.87 | 44.46 | 53.63 |
| 259 | 28.49 | 26.26 | 22.54 | 22.71 | 33.13 | 32.53 | 30.62 | 29.44 | 54.70 | 45.30 | 49.28 | 39.78 | 46.70 | 44.53 | 53.56 |
| 260 | 28.19 | 26.53 | 22.64 | 22.64 | 31.99 | 33.54 | 31.05 | 29.15 | 54.70 | 45.30 | 49.13 | 39.98 | 46.73 | 44.56 | 53.81 |
| 261 | 28.50 | 26.19 | 22.53 | 22.78 | 33.16 | 32.25 | 30.55 | 29.77 | 54.70 | 45.30 | 49.23 | 39.77 | 46.92 | 44.50 | 53.34 |
| 262 | 28.49 | 26.20 | 22.56 | 22.75 | 33.07 | 32.24 | 30.72 | 29.73 | 54.70 | 45.30 | 49.22 | 39.73 | 46.99 | 44.47 | 53.35 |
| 263 | 28.49 | 26.21 | 22.54 | 22.76 | 33.12 | 32.28 | 30.64 | 29.70 | 54.70 | 45.30 | 49.20 | 39.77 | 46.92 | 44.49 | 53.40 |
| 264 | 28.47 | 26.19 | 22.57 | 22.77 | 33.11 | 32.28 | 30.61 | 29.70 | 54.70 | 45.30 | 49.29 | 39.80 | 46.92 | 44.54 | 53.48 |
| 265 | 28.45 | 26.23 | 22.56 | 22.76 | 33.05 | 32.26 | 30.58 | 29.82 | 54.70 | 45.30 | 49.19 | 39.78 | 46.99 | 44.48 | 53.50 |
| 266 | 28.45 | 26.21 | 22.57 | 22.77 | 33.08 | 32.32 | 30.62 | 29.67 | 54.70 | 45.30 | 49.31 | 39.81 | 46.90 | 44.56 | 53.47 |
| 267 | 28.17 | 26.54 | 22.68 | 22.60 | 31.86 | 33.47 | 31.23 | 29.18 | 54.70 | 45.30 | 49.00 | 39.97 | 46.89 | 44.49 | 53.66 |
| 268 | 28.35 | 25.81 | 22.66 | 23.18 | 33.08 | 30.77 | 31.04 | 30.97 | 54.20 | 45.80 | 49.29 | 39.97 | 48.28 | 44.63 | 54.32 |
| 269 | 28.56 | 26.03 | 22.56 | 22.85 | 33.85 | 31.30 | 30.50 | 30.24 | 54.60 | 45.40 | 49.19 | 39.78 | 47.28 | 44.48 | 53.44 |
| 270 | 28.38 | 25.72 | 22.71 | 23.19 | 33.12 | 30.55 | 31.28 | 31.06 | 54.10 | 45.90 | 49.32 | 39.87 | 48.51 | 44.60 | 54.25 |
| 271 | 28.27 | 25.98 | 22.69 | 23.06 | 32.84 | 31.57 | 30.91 | 30.45 | 54.30 | 45.70 | 49.41 | 40.05 | 47.78 | 44.73 | 53.35 |
| 272 | 28.47 | 26.16 | 22.55 | 22.82 | 33.02 | 32.13 | 30.72 | 29.86 | 54.60 | 45.40 | 49.18 | 39.80 | 47.12 | 44.49 | 53.59 |

|     |       |       |       |       |       |       |       |       |       |       |       |       |       |       |       |
|-----|-------|-------|-------|-------|-------|-------|-------|-------|-------|-------|-------|-------|-------|-------|-------|
| 273 | 28.50 | 26.06 | 22.55 | 22.89 | 33.15 | 31.66 | 30.63 | 30.40 | 54.60 | 45.40 | 49.20 | 39.65 | 47.47 | 44.43 | 53.62 |
| 274 | 28.57 | 25.61 | 22.71 | 23.11 | 33.60 | 30.51 | 31.17 | 30.65 | 54.20 | 45.80 | 49.58 | 39.78 | 48.10 | 44.68 | 54.67 |
| 275 | 28.06 | 26.10 | 22.83 | 23.01 | 31.46 | 31.43 | 31.91 | 31.09 | 54.20 | 45.80 | 48.67 | 39.87 | 48.98 | 44.27 | 54.32 |
| 276 | 28.14 | 26.42 | 22.93 | 22.51 | 31.92 | 32.79 | 31.98 | 29.12 | 54.60 | 45.40 | 48.96 | 39.95 | 47.39 | 44.46 | 53.94 |
| 277 | 28.61 | 25.93 | 22.50 | 22.96 | 33.97 | 30.97 | 30.30 | 30.63 | 54.50 | 45.50 | 49.15 | 39.76 | 47.47 | 44.45 | 53.42 |
| 278 | 28.61 | 25.94 | 22.50 | 22.95 | 33.99 | 30.98 | 30.26 | 30.64 | 54.50 | 45.50 | 49.13 | 39.77 | 47.45 | 44.45 | 53.50 |
| 279 | 28.39 | 26.03 | 22.67 | 22.92 | 33.01 | 31.31 | 31.39 | 30.36 | 54.40 | 45.60 | 49.15 | 39.68 | 47.93 | 44.41 | 53.96 |
| 280 | 28.14 | 26.06 | 22.77 | 23.02 | 32.20 | 31.77 | 31.49 | 30.41 | 54.20 | 45.80 | 49.38 | 39.88 | 48.13 | 44.63 | 54.05 |
| 281 | 28.20 | 26.13 | 22.73 | 22.94 | 32.43 | 31.89 | 31.33 | 30.23 | 54.30 | 45.70 | 49.33 | 39.83 | 47.86 | 44.58 | 53.95 |
| 282 | 28.13 | 26.10 | 22.81 | 22.96 | 32.28 | 31.94 | 31.45 | 30.14 | 54.20 | 45.80 | 49.49 | 39.91 | 47.90 | 44.70 | 53.98 |
| 283 | 28.09 | 26.11 | 22.84 | 22.96 | 32.22 | 31.90 | 31.57 | 30.13 | 54.20 | 45.80 | 49.46 | 39.94 | 47.99 | 44.70 | 54.06 |
| 284 | 28.14 | 26.11 | 22.77 | 22.98 | 32.22 | 31.84 | 31.51 | 30.34 | 54.30 | 45.70 | 49.35 | 39.82 | 48.07 | 44.58 | 53.97 |
| 285 | 28.14 | 26.06 | 22.75 | 23.05 | 32.34 | 31.67 | 31.36 | 30.41 | 54.20 | 45.80 | 49.33 | 39.98 | 48.09 | 44.66 | 54.09 |
| 286 | 28.17 | 26.02 | 22.78 | 23.03 | 32.37 | 31.45 | 31.43 | 30.60 | 54.20 | 45.80 | 49.25 | 39.92 | 48.26 | 44.58 | 53.91 |
| 287 | 28.14 | 26.03 | 22.80 | 23.03 | 32.29 | 31.45 | 31.50 | 30.60 | 54.20 | 45.80 | 49.25 | 39.92 | 48.32 | 44.58 | 53.89 |
| 288 | 28.22 | 26.08 | 22.74 | 22.96 | 32.48 | 31.59 | 31.37 | 30.43 | 54.30 | 45.70 | 49.13 | 39.92 | 48.06 | 44.52 | 53.85 |
| 289 | 28.09 | 26.01 | 22.83 | 23.07 | 32.14 | 31.44 | 31.54 | 30.70 | 54.10 | 45.90 | 49.25 | 40.01 | 48.44 | 44.63 | 54.01 |
| 290 | 28.10 | 25.99 | 22.82 | 23.09 | 32.18 | 31.38 | 31.50 | 30.76 | 54.10 | 45.90 | 49.25 | 40.01 | 48.46 | 44.63 | 54.01 |
| 291 | 28.08 | 26.02 | 22.82 | 23.08 | 32.22 | 31.48 | 31.49 | 30.63 | 54.10 | 45.90 | 49.33 | 40.01 | 48.35 | 44.67 | 54.03 |
| 292 | 28.07 | 26.04 | 22.83 | 23.06 | 31.99 | 31.60 | 31.67 | 30.59 | 54.10 | 45.90 | 49.36 | 39.87 | 48.44 | 44.62 | 54.11 |
| 293 | 28.06 | 26.07 | 22.85 | 23.02 | 31.95 | 31.64 | 31.75 | 30.52 | 54.10 | 45.90 | 49.31 | 39.87 | 48.44 | 44.59 | 54.14 |
| 294 | 28.21 | 26.01 | 22.75 | 23.04 | 32.57 | 31.43 | 31.23 | 30.62 | 54.20 | 45.80 | 49.33 | 39.87 | 48.15 | 44.60 | 54.05 |
| 295 | 28.23 | 25.99 | 22.69 | 23.09 | 32.52 | 31.42 | 31.12 | 30.78 | 54.20 | 45.80 | 49.25 | 39.90 | 48.20 | 44.57 | 54.05 |
| 296 | 28.17 | 25.95 | 22.80 | 23.07 | 32.53 | 31.34 | 31.31 | 30.63 | 54.10 | 45.90 | 49.48 | 39.92 | 48.23 | 44.70 | 54.20 |
| 297 | 28.17 | 25.96 | 22.80 | 23.07 | 32.53 | 31.38 | 31.31 | 30.59 | 54.10 | 45.90 | 49.48 | 39.92 | 48.20 | 44.70 | 54.16 |

|     |       |       |       |       |       |       |       |       |       |       |       |       |       |       |       |
|-----|-------|-------|-------|-------|-------|-------|-------|-------|-------|-------|-------|-------|-------|-------|-------|
| 298 | 28.16 | 25.93 | 22.81 | 23.09 | 32.53 | 31.29 | 31.32 | 30.64 | 54.10 | 45.90 | 49.48 | 39.98 | 48.26 | 44.73 | 54.11 |
| 299 | 28.20 | 25.93 | 22.79 | 23.08 | 32.54 | 31.32 | 31.36 | 30.61 | 54.10 | 45.90 | 49.45 | 39.92 | 48.23 | 44.69 | 54.22 |
| 300 | 28.19 | 25.93 | 22.79 | 23.09 | 32.57 | 31.33 | 31.31 | 30.62 | 54.10 | 45.90 | 49.51 | 39.92 | 48.20 | 44.72 | 54.38 |
| 301 | 28.18 | 25.93 | 22.79 | 23.09 | 32.48 | 31.36 | 31.39 | 30.62 | 54.10 | 45.90 | 49.51 | 39.90 | 48.26 | 44.70 | 54.19 |
| 302 | 28.20 | 26.05 | 22.75 | 23.00 | 32.55 | 31.61 | 31.22 | 30.52 | 54.20 | 45.80 | 49.36 | 39.86 | 48.03 | 44.61 | 53.96 |
| 303 | 28.24 | 26.16 | 22.74 | 22.86 | 32.55 | 32.01 | 31.30 | 30.04 | 54.40 | 45.60 | 49.25 | 39.89 | 47.65 | 44.57 | 54.01 |
| 304 | 28.18 | 26.19 | 22.85 | 22.78 | 32.37 | 32.10 | 31.54 | 29.86 | 54.40 | 45.60 | 49.23 | 39.97 | 47.70 | 44.60 | 53.90 |
| 305 | 28.27 | 26.12 | 22.76 | 22.84 | 32.67 | 31.91 | 31.33 | 30.04 | 54.40 | 45.60 | 49.29 | 39.85 | 47.67 | 44.57 | 54.00 |
| 306 | 28.26 | 26.12 | 22.75 | 22.87 | 32.63 | 31.96 | 31.26 | 30.06 | 54.40 | 45.60 | 49.32 | 39.91 | 47.64 | 44.61 | 54.00 |
| 307 | 28.24 | 26.14 | 22.80 | 22.82 | 32.43 | 32.07 | 31.49 | 29.93 | 54.40 | 45.60 | 49.29 | 39.88 | 47.70 | 44.58 | 54.05 |
| 308 | 28.46 | 26.15 | 22.58 | 22.82 | 33.22 | 31.99 | 30.58 | 30.05 | 54.60 | 45.40 | 49.04 | 39.98 | 47.16 | 44.51 | 53.81 |
| 309 | 28.46 | 26.05 | 22.61 | 22.88 | 33.17 | 31.65 | 30.76 | 30.29 | 54.50 | 45.50 | 49.00 | 39.97 | 47.49 | 44.48 | 53.82 |
| 310 | 28.18 | 26.12 | 22.81 | 22.89 | 32.28 | 31.87 | 31.42 | 30.24 | 54.30 | 45.70 | 49.09 | 40.05 | 47.96 | 44.57 | 53.81 |
| 311 | 28.29 | 26.20 | 22.78 | 22.74 | 32.51 | 32.08 | 31.43 | 29.90 | 54.50 | 45.50 | 48.96 | 39.95 | 47.63 | 44.46 | 53.69 |
| 312 | 28.34 | 26.20 | 22.68 | 22.78 | 33.02 | 31.91 | 31.18 | 29.78 | 54.50 | 45.50 | 49.04 | 39.95 | 47.37 | 44.50 | 53.71 |
| 313 | 28.33 | 26.21 | 22.69 | 22.77 | 33.01 | 31.98 | 31.15 | 29.71 | 54.50 | 45.50 | 49.10 | 39.95 | 47.31 | 44.53 | 53.70 |
| 314 | 28.31 | 26.27 | 22.68 | 22.75 | 32.89 | 32.22 | 31.11 | 29.61 | 54.60 | 45.40 | 49.13 | 39.95 | 47.19 | 44.54 | 53.88 |
| 315 | 28.34 | 26.27 | 22.63 | 22.76 | 33.01 | 32.22 | 30.91 | 29.67 | 54.60 | 45.40 | 49.10 | 39.95 | 47.10 | 44.53 | 53.64 |
| 316 | 28.35 | 26.25 | 22.62 | 22.78 | 33.07 | 32.06 | 30.94 | 29.76 | 54.60 | 45.40 | 49.04 | 39.95 | 47.19 | 44.50 | 53.68 |
| 317 | 28.44 | 26.28 | 22.60 | 22.67 | 33.12 | 32.16 | 31.14 | 29.58 | 54.70 | 45.30 | 49.00 | 39.71 | 47.12 | 44.36 | 53.81 |
| 318 | 28.43 | 26.19 | 22.59 | 22.79 | 33.17 | 31.91 | 31.01 | 29.84 | 54.60 | 45.40 | 49.04 | 39.81 | 47.28 | 44.43 | 53.70 |
| 319 | 28.36 | 26.20 | 22.66 | 22.77 | 32.89 | 31.97 | 31.36 | 29.76 | 54.60 | 45.40 | 49.06 | 39.80 | 47.44 | 44.43 | 53.90 |
| 320 | 28.32 | 26.19 | 22.72 | 22.77 | 32.78 | 31.92 | 31.47 | 29.79 | 54.50 | 45.50 | 49.12 | 39.80 | 47.55 | 44.46 | 53.84 |
| 321 | 28.40 | 26.23 | 22.60 | 22.77 | 33.28 | 31.97 | 30.72 | 29.86 | 54.60 | 45.40 | 49.12 | 39.88 | 47.12 | 44.50 | 53.76 |
| 322 | 28.41 | 26.24 | 22.60 | 22.75 | 33.32 | 31.99 | 30.72 | 29.79 | 54.60 | 45.40 | 49.09 | 39.91 | 47.06 | 44.50 | 53.76 |

|     |       |       |       |       |       |       |       |       |       |       |       |       |       |       |       |
|-----|-------|-------|-------|-------|-------|-------|-------|-------|-------|-------|-------|-------|-------|-------|-------|
| 323 | 28.36 | 26.21 | 22.63 | 22.80 | 33.15 | 32.01 | 30.77 | 29.87 | 54.60 | 45.40 | 49.17 | 39.94 | 47.18 | 44.56 | 53.82 |
| 324 | 28.41 | 26.18 | 22.59 | 22.82 | 33.23 | 31.82 | 30.75 | 30.05 | 54.60 | 45.40 | 49.15 | 39.79 | 47.29 | 44.47 | 53.76 |
| 325 | 28.25 | 26.28 | 22.65 | 22.81 | 32.66 | 32.62 | 30.94 | 29.60 | 54.50 | 45.50 | 49.41 | 39.93 | 47.06 | 44.67 | 53.58 |
| 326 | 28.44 | 26.03 | 22.49 | 23.04 | 33.36 | 31.61 | 30.29 | 30.56 | 54.50 | 45.50 | 49.30 | 39.89 | 47.39 | 44.60 | 53.96 |
| 327 | 28.26 | 26.04 | 22.76 | 22.94 | 32.71 | 31.70 | 31.11 | 30.28 | 54.30 | 45.70 | 49.17 | 40.13 | 47.78 | 44.65 | 53.90 |
| 328 | 28.54 | 26.22 | 22.36 | 22.89 | 33.66 | 32.16 | 29.74 | 30.12 | 54.80 | 45.20 | 49.06 | 40.02 | 46.66 | 44.54 | 53.78 |
| 329 | 28.54 | 26.21 | 22.34 | 22.90 | 33.63 | 32.18 | 29.75 | 30.14 | 54.80 | 45.20 | 49.07 | 40.01 | 46.67 | 44.54 | 53.81 |
| 330 | 28.54 | 26.23 | 22.34 | 22.88 | 33.69 | 32.25 | 29.68 | 30.07 | 54.80 | 45.20 | 49.09 | 40.02 | 46.57 | 44.55 | 53.69 |
| 331 | 28.56 | 26.20 | 22.33 | 22.91 | 33.71 | 32.17 | 29.67 | 30.13 | 54.80 | 45.20 | 49.07 | 40.03 | 46.61 | 44.55 | 53.78 |
| 332 | 28.54 | 26.19 | 22.33 | 22.93 | 33.66 | 32.17 | 29.74 | 30.17 | 54.70 | 45.30 | 49.16 | 39.98 | 46.67 | 44.57 | 53.86 |
| 333 | 28.47 | 26.23 | 22.41 | 22.89 | 33.37 | 32.20 | 30.04 | 30.10 | 54.70 | 45.30 | 49.07 | 40.01 | 46.84 | 44.54 | 53.80 |
| 334 | 28.47 | 26.05 | 22.59 | 22.89 | 33.11 | 31.59 | 30.87 | 30.33 | 54.50 | 45.50 | 48.97 | 39.85 | 47.61 | 44.41 | 53.48 |
| 335 | 28.45 | 26.04 | 22.61 | 22.89 | 33.06 | 31.51 | 30.97 | 30.39 | 54.50 | 45.50 | 48.97 | 39.83 | 47.73 | 44.40 | 53.52 |
| 336 | 28.45 | 26.03 | 22.60 | 22.91 | 33.06 | 31.48 | 30.92 | 30.46 | 54.50 | 45.50 | 48.97 | 39.83 | 47.76 | 44.40 | 53.60 |
| 337 | 28.45 | 26.08 | 22.60 | 22.88 | 33.06 | 31.66 | 30.84 | 30.37 | 54.50 | 45.50 | 49.00 | 39.80 | 47.61 | 44.40 | 53.43 |
| 338 | 28.34 | 26.15 | 22.66 | 22.84 | 32.76 | 31.86 | 31.09 | 30.20 | 54.50 | 45.50 | 49.07 | 39.78 | 47.65 | 44.43 | 53.48 |
| 339 | 28.48 | 26.05 | 22.53 | 22.93 | 33.32 | 31.50 | 30.59 | 30.51 | 54.50 | 45.50 | 49.00 | 39.84 | 47.55 | 44.42 | 53.33 |
| 340 | 28.46 | 26.05 | 22.56 | 22.93 | 33.21 | 31.50 | 30.71 | 30.51 | 54.50 | 45.50 | 49.00 | 39.84 | 47.64 | 44.42 | 53.41 |
| 341 | 28.45 | 26.06 | 22.56 | 22.93 | 33.17 | 31.53 | 30.71 | 30.51 | 54.50 | 45.50 | 49.00 | 39.84 | 47.64 | 44.42 | 53.36 |
| 342 | 28.30 | 25.99 | 22.65 | 23.06 | 32.73 | 31.41 | 31.00 | 30.76 | 54.30 | 45.70 | 49.17 | 39.87 | 48.07 | 44.52 | 53.52 |
| 343 | 28.47 | 26.01 | 22.57 | 22.94 | 33.17 | 31.39 | 30.82 | 30.50 | 54.50 | 45.50 | 48.97 | 39.84 | 47.73 | 44.41 | 53.75 |
| 344 | 28.47 | 26.02 | 22.59 | 22.92 | 33.13 | 31.43 | 30.91 | 30.41 | 54.50 | 45.50 | 48.96 | 39.86 | 47.71 | 44.41 | 53.81 |
| 345 | 28.51 | 25.95 | 22.57 | 22.98 | 33.20 | 31.23 | 30.89 | 30.62 | 54.50 | 45.50 | 48.99 | 39.80 | 47.86 | 44.39 | 53.86 |
| 346 | 28.49 | 25.98 | 22.59 | 22.94 | 33.20 | 31.38 | 30.89 | 30.42 | 54.50 | 45.50 | 49.02 | 39.86 | 47.71 | 44.44 | 53.80 |
| 347 | 28.48 | 25.89 | 22.61 | 23.03 | 33.25 | 30.99 | 30.90 | 30.75 | 54.40 | 45.60 | 49.04 | 39.86 | 48.00 | 44.45 | 53.51 |

|     |       |       |       |       |       |       |       |       |       |       |       |       |       |       |       |
|-----|-------|-------|-------|-------|-------|-------|-------|-------|-------|-------|-------|-------|-------|-------|-------|
| 348 | 28.45 | 25.93 | 22.63 | 22.99 | 33.21 | 31.07 | 30.95 | 30.63 | 54.40 | 45.60 | 49.04 | 39.89 | 47.94 | 44.47 | 53.51 |
| 349 | 28.37 | 25.90 | 22.73 | 23.00 | 32.93 | 31.00 | 31.27 | 30.66 | 54.30 | 45.70 | 49.07 | 39.92 | 48.20 | 44.50 | 53.68 |
| 350 | 28.33 | 25.95 | 22.70 | 23.02 | 32.79 | 31.23 | 31.14 | 30.65 | 54.30 | 45.70 | 49.16 | 39.89 | 48.12 | 44.52 | 53.66 |
| 351 | 28.30 | 26.13 | 22.66 | 22.90 | 32.79 | 31.59 | 30.96 | 30.47 | 54.40 | 45.60 | 48.96 | 39.92 | 47.83 | 44.44 | 53.54 |
| 352 | 28.43 | 26.00 | 22.57 | 23.00 | 33.16 | 31.21 | 30.82 | 30.66 | 54.40 | 45.60 | 48.96 | 39.86 | 47.89 | 44.41 | 53.38 |
| 353 | 28.40 | 26.06 | 22.52 | 23.02 | 33.26 | 31.60 | 30.43 | 30.48 | 54.50 | 45.50 | 49.26 | 39.90 | 47.46 | 44.58 | 53.79 |
| 354 | 28.37 | 26.00 | 22.57 | 23.06 | 33.23 | 31.46 | 30.51 | 30.57 | 54.40 | 45.60 | 49.38 | 39.90 | 47.61 | 44.64 | 53.83 |
| 355 | 28.31 | 25.98 | 22.61 | 23.09 | 33.04 | 31.42 | 30.60 | 30.64 | 54.30 | 45.70 | 49.35 | 40.02 | 47.75 | 44.68 | 53.93 |
| 356 | 28.35 | 25.95 | 22.58 | 23.11 | 33.13 | 31.43 | 30.53 | 30.65 | 54.30 | 45.70 | 49.41 | 39.99 | 47.70 | 44.70 | 53.95 |
| 357 | 28.27 | 25.94 | 22.71 | 23.08 | 32.68 | 31.33 | 31.15 | 30.75 | 54.20 | 45.80 | 49.42 | 39.77 | 48.17 | 44.60 | 53.59 |
| 358 | 28.30 | 25.95 | 22.66 | 23.09 | 32.86 | 31.38 | 30.87 | 30.73 | 54.20 | 45.80 | 49.39 | 39.89 | 47.97 | 44.64 | 53.66 |
| 359 | 28.51 | 25.87 | 22.46 | 23.16 | 33.84 | 30.68 | 30.12 | 31.18 | 54.40 | 45.60 | 49.36 | 39.69 | 47.80 | 44.53 | 54.20 |
| 360 | 28.50 | 25.88 | 22.46 | 23.16 | 33.80 | 30.71 | 30.11 | 31.18 | 54.40 | 45.60 | 49.33 | 39.72 | 47.80 | 44.53 | 54.19 |
| 361 | 28.34 | 25.92 | 22.66 | 23.08 | 33.02 | 31.03 | 31.06 | 30.83 | 54.30 | 45.70 | 49.25 | 39.83 | 48.15 | 44.54 | 54.17 |
| 362 | 28.43 | 26.05 | 22.59 | 22.94 | 33.28 | 31.53 | 30.57 | 30.48 | 54.50 | 45.50 | 49.25 | 39.83 | 47.51 | 44.54 | 53.72 |
| 363 | 28.40 | 25.67 | 22.73 | 23.20 | 33.18 | 30.56 | 31.35 | 30.87 | 54.10 | 45.90 | 49.38 | 39.99 | 48.42 | 44.68 | 53.90 |
| 364 | 28.30 | 25.72 | 22.77 | 23.21 | 32.97 | 30.62 | 31.36 | 30.93 | 54.00 | 46.00 | 49.38 | 40.05 | 48.51 | 44.71 | 54.03 |
| 365 | 28.30 | 25.87 | 22.70 | 23.13 | 32.74 | 30.91 | 31.35 | 30.94 | 54.20 | 45.80 | 49.15 | 39.87 | 48.48 | 44.51 | 54.05 |
| 366 | 28.40 | 25.79 | 22.63 | 23.19 | 33.01 | 30.83 | 31.12 | 31.00 | 54.20 | 45.80 | 49.28 | 39.83 | 48.35 | 44.55 | 54.07 |
| 367 | 28.35 | 25.84 | 22.66 | 23.15 | 32.76 | 30.98 | 31.44 | 30.84 | 54.20 | 45.80 | 49.15 | 39.87 | 48.42 | 44.51 | 54.27 |
| 368 | 28.43 | 25.89 | 22.60 | 23.09 | 32.96 | 31.08 | 31.37 | 30.71 | 54.30 | 45.70 | 49.06 | 39.79 | 48.22 | 44.42 | 54.02 |
| 369 | 28.58 | 26.04 | 22.51 | 22.87 | 33.92 | 31.43 | 30.30 | 30.17 | 54.60 | 45.40 | 49.20 | 39.85 | 47.09 | 44.53 | 53.60 |
| 370 | 28.61 | 26.05 | 22.49 | 22.85 | 34.09 | 31.51 | 30.15 | 30.05 | 54.70 | 45.30 | 49.22 | 39.89 | 46.90 | 44.55 | 53.58 |
| 371 | 28.59 | 25.97 | 22.51 | 22.93 | 33.97 | 31.28 | 30.27 | 30.33 | 54.60 | 45.40 | 49.28 | 39.86 | 47.19 | 44.57 | 53.79 |
| 372 | 28.45 | 26.00 | 22.61 | 22.95 | 33.41 | 31.34 | 30.83 | 30.25 | 54.40 | 45.60 | 49.20 | 39.91 | 47.55 | 44.56 | 53.92 |

|     |       |       |       |       |       |       |       |       |       |       |       |       |       |       |       |
|-----|-------|-------|-------|-------|-------|-------|-------|-------|-------|-------|-------|-------|-------|-------|-------|
| 373 | 28.40 | 25.98 | 22.55 | 23.07 | 33.03 | 31.36 | 30.45 | 30.88 | 54.40 | 45.60 | 49.19 | 39.83 | 47.83 | 44.51 | 53.05 |
| 374 | 28.39 | 25.79 | 22.43 | 23.39 | 33.21 | 30.96 | 30.13 | 31.40 | 54.20 | 45.80 | 49.45 | 39.98 | 48.03 | 44.71 | 54.01 |
| 375 | 28.39 | 25.81 | 22.42 | 23.38 | 33.21 | 31.03 | 30.09 | 31.36 | 54.20 | 45.80 | 49.45 | 39.98 | 47.97 | 44.71 | 53.98 |
| 376 | 28.47 | 25.91 | 22.30 | 23.32 | 33.57 | 31.28 | 29.56 | 31.25 | 54.40 | 45.60 | 49.43 | 39.93 | 47.49 | 44.68 | 53.90 |
| 377 | 28.25 | 25.76 | 22.63 | 23.36 | 32.76 | 30.58 | 30.68 | 31.74 | 54.00 | 46.00 | 49.32 | 39.93 | 48.71 | 44.62 | 53.46 |
| 378 | 28.28 | 26.11 | 22.76 | 22.85 | 32.78 | 31.99 | 31.35 | 29.78 | 54.40 | 45.60 | 49.49 | 39.84 | 47.49 | 44.67 | 53.24 |
| 379 | 28.30 | 26.17 | 22.72 | 22.81 | 32.87 | 32.20 | 31.21 | 29.65 | 54.50 | 45.50 | 49.55 | 39.79 | 47.26 | 44.67 | 53.22 |
| 380 | 28.21 | 26.15 | 22.75 | 22.89 | 32.15 | 31.87 | 31.47 | 30.45 | 54.40 | 45.60 | 48.87 | 39.95 | 48.12 | 44.41 | 53.11 |
| 381 | 28.24 | 26.22 | 22.70 | 22.84 | 32.40 | 32.06 | 31.30 | 30.13 | 54.50 | 45.50 | 48.94 | 39.94 | 47.73 | 44.44 | 53.21 |
| 382 | 28.32 | 25.87 | 22.74 | 23.08 | 32.79 | 31.10 | 31.11 | 30.83 | 54.20 | 45.80 | 49.29 | 39.90 | 48.25 | 44.60 | 53.36 |
| 383 | 28.38 | 25.86 | 22.67 | 23.09 | 32.78 | 30.69 | 31.33 | 31.10 | 54.20 | 45.80 | 48.77 | 39.91 | 48.60 | 44.34 | 53.52 |
| 384 | 28.48 | 26.05 | 22.60 | 22.87 | 33.13 | 31.70 | 30.74 | 30.24 | 54.50 | 45.50 | 49.29 | 39.68 | 47.44 | 44.49 | 53.58 |
| 385 | 28.12 | 26.06 | 22.81 | 23.01 | 32.02 | 31.90 | 31.39 | 30.48 | 54.20 | 45.80 | 49.59 | 39.74 | 48.14 | 44.67 | 54.48 |
| 386 | 28.14 | 26.10 | 22.79 | 22.98 | 32.09 | 32.01 | 31.31 | 30.37 | 54.20 | 45.80 | 49.57 | 39.74 | 48.00 | 44.65 | 54.47 |
| 387 | 28.36 | 25.98 | 22.72 | 22.93 | 32.64 | 31.53 | 31.14 | 30.48 | 54.30 | 45.70 | 49.25 | 39.75 | 47.97 | 44.50 | 54.38 |
| 388 | 28.28 | 26.00 | 22.84 | 22.88 | 32.32 | 31.64 | 31.72 | 30.32 | 54.30 | 45.70 | 49.30 | 39.68 | 48.17 | 44.49 | 54.05 |
| 389 | 28.71 | 25.45 | 22.65 | 23.19 | 34.16 | 29.75 | 30.92 | 31.07 | 54.20 | 45.80 | 49.36 | 39.86 | 48.29 | 44.61 | 54.20 |
| 390 | 28.72 | 25.49 | 22.64 | 23.15 | 34.17 | 29.77 | 30.92 | 31.06 | 54.20 | 45.80 | 49.32 | 39.79 | 48.28 | 44.55 | 54.27 |
| 391 | 28.70 | 25.54 | 22.64 | 23.13 | 34.04 | 29.98 | 30.98 | 30.93 | 54.20 | 45.80 | 49.30 | 39.80 | 48.20 | 44.55 | 54.21 |
| 392 | 28.61 | 25.79 | 22.66 | 22.94 | 33.77 | 30.77 | 31.15 | 30.30 | 54.40 | 45.60 | 49.27 | 39.76 | 47.77 | 44.52 | 54.58 |
| 393 | 28.59 | 25.75 | 22.67 | 22.99 | 33.71 | 30.69 | 31.11 | 30.39 | 54.30 | 45.70 | 49.39 | 39.73 | 47.85 | 44.56 | 54.50 |
| 394 | 28.41 | 25.65 | 22.89 | 23.05 | 32.97 | 30.31 | 32.10 | 30.68 | 54.10 | 45.90 | 49.29 | 39.75 | 48.77 | 44.52 | 54.70 |
| 395 | 28.51 | 25.69 | 22.74 | 23.05 | 33.42 | 30.69 | 31.34 | 30.46 | 54.20 | 45.80 | 49.46 | 39.86 | 48.07 | 44.66 | 54.50 |
| 396 | 28.66 | 25.62 | 22.60 | 23.11 | 33.84 | 30.45 | 30.88 | 30.76 | 54.30 | 45.70 | 49.39 | 39.79 | 47.97 | 44.59 | 54.60 |
| 397 | 28.63 | 25.62 | 22.67 | 23.09 | 33.61 | 30.31 | 31.30 | 30.75 | 54.20 | 45.80 | 49.19 | 39.82 | 48.26 | 44.50 | 54.39 |



|     |       |       |       |       |       |       |       |       |       |       |       |       |       |       |       |
|-----|-------|-------|-------|-------|-------|-------|-------|-------|-------|-------|-------|-------|-------|-------|-------|
| 398 | 28.63 | 25.68 | 22.73 | 22.96 | 33.94 | 30.52 | 31.19 | 30.29 | 54.30 | 45.70 | 49.39 | 39.85 | 47.82 | 44.62 | 54.55 |
| 399 | 28.60 | 25.66 | 22.75 | 23.00 | 33.79 | 30.46 | 31.28 | 30.42 | 54.30 | 45.70 | 49.39 | 39.85 | 48.00 | 44.62 | 54.48 |
| 400 | 28.41 | 25.70 | 22.77 | 23.12 | 32.82 | 30.55 | 31.73 | 30.89 | 54.10 | 45.90 | 49.22 | 39.80 | 48.67 | 44.51 | 54.59 |
| 401 | 28.38 | 25.63 | 22.83 | 23.16 | 32.78 | 30.31 | 31.88 | 31.02 | 54.00 | 46.00 | 49.28 | 39.80 | 48.90 | 44.54 | 54.59 |
| 402 | 28.48 | 25.68 | 22.75 | 23.08 | 33.21 | 30.42 | 31.60 | 30.73 | 54.20 | 45.80 | 49.28 | 39.77 | 48.46 | 44.52 | 54.65 |
| 403 | 28.50 | 25.70 | 22.70 | 23.10 | 33.28 | 30.47 | 31.25 | 30.88 | 54.20 | 45.80 | 49.19 | 39.86 | 48.35 | 44.52 | 54.48 |
| 404 | 28.40 | 25.78 | 22.70 | 23.12 | 32.94 | 30.94 | 31.21 | 30.83 | 54.20 | 45.80 | 49.49 | 39.69 | 48.27 | 44.59 | 54.32 |
| 405 | 27.98 | 26.16 | 22.87 | 23.00 | 31.36 | 31.70 | 31.91 | 30.82 | 54.10 | 45.90 | 48.85 | 39.95 | 48.80 | 44.40 | 54.35 |
| 406 | 28.03 | 26.23 | 22.75 | 23.00 | 31.46 | 31.96 | 31.72 | 30.70 | 54.30 | 45.70 | 48.84 | 39.88 | 48.52 | 44.36 | 54.28 |
| 407 | 28.23 | 26.21 | 22.94 | 22.62 | 31.85 | 31.91 | 32.70 | 29.77 | 54.40 | 45.60 | 48.67 | 39.68 | 48.32 | 44.17 | 54.35 |
| 408 | 28.20 | 26.27 | 22.92 | 22.61 | 31.70 | 32.10 | 32.66 | 29.78 | 54.50 | 45.50 | 48.64 | 39.65 | 48.29 | 44.14 | 54.17 |
| 409 | 28.26 | 26.17 | 22.84 | 22.72 | 32.09 | 31.65 | 31.95 | 30.26 | 54.40 | 45.60 | 48.58 | 39.83 | 48.29 | 44.20 | 54.06 |
| 410 | 28.25 | 26.16 | 22.84 | 22.74 | 32.13 | 31.58 | 31.91 | 30.32 | 54.40 | 45.60 | 48.61 | 39.83 | 48.32 | 44.22 | 54.17 |
| 411 | 28.23 | 26.19 | 22.89 | 22.69 | 32.07 | 31.82 | 32.02 | 30.05 | 54.40 | 45.60 | 48.75 | 39.80 | 48.17 | 44.28 | 54.18 |
| 412 | 28.26 | 26.13 | 22.87 | 22.74 | 32.17 | 31.60 | 31.94 | 30.27 | 54.40 | 45.60 | 48.72 | 39.83 | 48.29 | 44.28 | 54.03 |
| 413 | 28.30 | 26.22 | 22.83 | 22.65 | 32.34 | 32.05 | 31.75 | 29.83 | 54.50 | 45.50 | 48.85 | 39.81 | 47.78 | 44.33 | 54.14 |
| 414 | 28.07 | 25.73 | 22.98 | 23.22 | 31.26 | 30.64 | 32.65 | 31.56 | 53.80 | 46.20 | 48.87 | 39.85 | 49.88 | 44.36 | 54.20 |
| 415 | 28.09 | 25.72 | 22.98 | 23.21 | 31.31 | 30.50 | 32.67 | 31.66 | 53.80 | 46.20 | 48.78 | 39.82 | 49.97 | 44.30 | 54.22 |
| 416 | 28.05 | 25.85 | 22.99 | 23.11 | 31.04 | 31.05 | 32.83 | 31.22 | 53.90 | 46.10 | 48.78 | 39.82 | 49.71 | 44.30 | 54.25 |
| 417 | 28.16 | 25.72 | 22.95 | 23.17 | 31.47 | 30.79 | 32.54 | 31.30 | 53.90 | 46.10 | 48.90 | 39.88 | 49.59 | 44.39 | 54.08 |
| 418 | 28.00 | 25.75 | 23.05 | 23.20 | 31.08 | 30.54 | 33.02 | 31.56 | 53.80 | 46.20 | 48.84 | 39.79 | 50.12 | 44.31 | 53.95 |
| 419 | 28.39 | 26.42 | 22.61 | 22.58 | 32.28 | 32.94 | 31.68 | 29.33 | 54.80 | 45.20 | 48.74 | 39.61 | 47.20 | 44.17 | 53.29 |
| 420 | 28.30 | 26.11 | 22.81 | 22.78 | 31.89 | 31.88 | 32.26 | 30.11 | 54.40 | 45.60 | 48.70 | 39.72 | 48.35 | 44.21 | 54.03 |
| 421 | 28.36 | 26.22 | 22.73 | 22.68 | 32.10 | 32.30 | 31.92 | 29.85 | 54.60 | 45.40 | 48.72 | 39.67 | 47.85 | 44.20 | 53.48 |
| 422 | 28.30 | 26.57 | 22.63 | 22.51 | 32.25 | 33.33 | 30.98 | 29.18 | 54.90 | 45.10 | 48.81 | 39.90 | 46.70 | 44.35 | 53.63 |

|     |       |       |       |       |       |       |       |       |       |       |       |       |       |       |       |
|-----|-------|-------|-------|-------|-------|-------|-------|-------|-------|-------|-------|-------|-------|-------|-------|
| 423 | 28.24 | 26.12 | 22.73 | 22.91 | 31.71 | 31.84 | 31.81 | 30.72 | 54.40 | 45.60 | 48.86 | 39.58 | 48.48 | 44.22 | 53.77 |
| 424 | 28.33 | 26.09 | 22.42 | 23.15 | 32.71 | 31.96 | 30.55 | 30.74 | 54.40 | 45.60 | 49.32 | 39.76 | 47.64 | 44.54 | 53.60 |
| 425 | 28.35 | 25.90 | 22.66 | 23.09 | 32.82 | 30.94 | 31.15 | 30.91 | 54.20 | 45.80 | 48.97 | 39.99 | 48.30 | 44.48 | 53.63 |
| 426 | 28.50 | 25.87 | 22.61 | 23.03 | 33.50 | 30.89 | 30.77 | 30.69 | 54.40 | 45.60 | 49.13 | 39.92 | 47.86 | 44.52 | 53.37 |
| 427 | 28.46 | 26.09 | 22.60 | 22.85 | 32.78 | 31.73 | 30.98 | 30.33 | 54.60 | 45.40 | 49.02 | 39.64 | 47.69 | 44.33 | 53.47 |
| 428 | 28.41 | 26.20 | 22.67 | 22.72 | 33.07 | 31.97 | 31.18 | 29.77 | 54.60 | 45.40 | 49.01 | 39.83 | 47.33 | 44.42 | 53.68 |
| 429 | 28.23 | 26.05 | 22.80 | 22.92 | 32.51 | 31.88 | 31.13 | 30.22 | 54.30 | 45.70 | 49.59 | 39.80 | 47.77 | 44.70 | 54.53 |
| 430 | 28.22 | 26.11 | 22.86 | 22.81 | 32.43 | 32.11 | 31.46 | 29.80 | 54.30 | 45.70 | 49.46 | 39.94 | 47.61 | 44.70 | 54.53 |
| 431 | 28.41 | 26.49 | 22.57 | 22.53 | 32.35 | 33.04 | 31.64 | 29.23 | 54.90 | 45.10 | 48.74 | 39.52 | 47.06 | 44.13 | 53.44 |
| 432 | 28.48 | 26.20 | 22.60 | 22.72 | 33.10 | 32.33 | 30.82 | 29.51 | 54.70 | 45.30 | 49.31 | 39.75 | 46.90 | 44.53 | 53.63 |
| 433 | 28.47 | 26.18 | 22.58 | 22.77 | 33.06 | 32.25 | 30.60 | 29.77 | 54.70 | 45.30 | 49.20 | 39.86 | 46.98 | 44.53 | 53.56 |
| 434 | 28.53 | 26.16 | 22.52 | 22.79 | 33.21 | 32.17 | 30.57 | 29.79 | 54.70 | 45.30 | 49.20 | 39.77 | 46.95 | 44.49 | 53.38 |
| 435 | 28.47 | 26.28 | 22.54 | 22.71 | 33.11 | 32.51 | 30.68 | 29.42 | 54.70 | 45.30 | 49.22 | 39.81 | 46.73 | 44.51 | 53.55 |
| 436 | 28.48 | 26.18 | 22.57 | 22.77 | 33.10 | 32.26 | 30.60 | 29.75 | 54.70 | 45.30 | 49.23 | 39.83 | 46.95 | 44.53 | 53.49 |
| 437 | 28.52 | 26.15 | 22.54 | 22.80 | 33.17 | 32.11 | 30.65 | 29.84 | 54.70 | 45.30 | 49.23 | 39.74 | 47.03 | 44.49 | 53.40 |
| 438 | 28.46 | 26.19 | 22.59 | 22.76 | 33.06 | 32.28 | 30.65 | 29.70 | 54.70 | 45.30 | 49.23 | 39.86 | 46.95 | 44.54 | 53.49 |
| 439 | 28.46 | 26.27 | 22.55 | 22.72 | 33.07 | 32.47 | 30.72 | 29.45 | 54.70 | 45.30 | 49.22 | 39.81 | 46.79 | 44.51 | 53.54 |
| 440 | 28.44 | 26.20 | 22.60 | 22.76 | 32.97 | 32.27 | 30.72 | 29.73 | 54.60 | 45.40 | 49.25 | 39.81 | 47.02 | 44.53 | 53.43 |
| 441 | 28.50 | 26.16 | 22.55 | 22.79 | 33.13 | 32.17 | 30.64 | 29.79 | 54.70 | 45.30 | 49.23 | 39.77 | 47.00 | 44.50 | 53.38 |
| 442 | 28.54 | 26.16 | 22.51 | 22.80 | 33.25 | 32.13 | 30.53 | 29.83 | 54.70 | 45.30 | 49.20 | 39.77 | 46.95 | 44.49 | 53.40 |
| 443 | 28.55 | 26.14 | 22.51 | 22.80 | 33.23 | 32.10 | 30.61 | 29.83 | 54.70 | 45.30 | 49.19 | 39.76 | 46.99 | 44.47 | 53.41 |
| 444 | 28.47 | 26.20 | 22.55 | 22.78 | 33.06 | 32.35 | 30.58 | 29.67 | 54.70 | 45.30 | 49.23 | 39.88 | 46.89 | 44.56 | 53.42 |
| 445 | 28.46 | 26.20 | 22.56 | 22.78 | 33.01 | 32.37 | 30.71 | 29.59 | 54.70 | 45.30 | 49.22 | 39.90 | 46.90 | 44.56 | 53.30 |
| 446 | 28.45 | 26.20 | 22.57 | 22.78 | 32.97 | 32.37 | 30.75 | 29.59 | 54.70 | 45.30 | 49.22 | 39.90 | 46.93 | 44.56 | 53.29 |
| 447 | 28.47 | 26.19 | 22.55 | 22.79 | 32.97 | 32.37 | 30.75 | 29.59 | 54.70 | 45.30 | 49.16 | 39.92 | 46.93 | 44.54 | 53.35 |

|     |              |              |       |       |              |              |       |       |       |       |       |       |              |       |       |
|-----|--------------|--------------|-------|-------|--------------|--------------|-------|-------|-------|-------|-------|-------|--------------|-------|-------|
| 448 | 28.47        | 26.23        | 22.55 | 22.75 | 33.02        | 32.41        | 30.65 | 29.62 | 54.70 | 45.30 | 49.16 | 39.87 | 46.87        | 44.51 | 53.41 |
| 449 | 28.44        | 26.17        | 22.58 | 22.80 | 32.93        | 32.27        | 30.75 | 29.73 | 54.60 | 45.40 | 49.22 | 39.90 | 47.05        | 44.56 | 53.41 |
| 450 | 28.44        | 26.21        | 22.58 | 22.77 | 32.86        | 32.37        | 30.84 | 29.62 | 54.70 | 45.30 | 49.13 | 39.90 | 47.02        | 44.51 | 53.42 |
| 451 | 28.43        | 26.20        | 22.59 | 22.78 | 32.90        | 32.34        | 30.79 | 29.66 | 54.60 | 45.40 | 49.19 | 39.90 | 47.02        | 44.54 | 53.39 |
| 452 | 28.47        | 26.22        | 22.56 | 22.75 | 32.98        | 32.41        | 30.69 | 29.62 | 54.70 | 45.30 | 49.16 | 39.87 | 46.90        | 44.51 | 53.41 |
| 453 | 28.48        | 26.22        | 22.55 | 22.75 | 33.02        | 32.41        | 30.65 | 29.62 | 54.70 | 45.30 | 49.16 | 39.87 | 46.87        | 44.51 | 53.42 |
| 454 | 28.47        | 26.20        | 22.57 | 22.76 | 32.97        | 32.35        | 30.76 | 29.63 | 54.70 | 45.30 | 49.19 | 39.84 | 46.96        | 44.51 | 53.41 |
| 455 | 28.47        | 26.20        | 22.56 | 22.77 | 33.01        | 32.34        | 30.68 | 29.66 | 54.70 | 45.30 | 49.19 | 39.87 | 46.93        | 44.53 | 53.40 |
| 456 | 28.47        | 26.21        | 22.56 | 22.76 | 33.01        | 32.37        | 30.68 | 29.62 | 54.70 | 45.30 | 49.19 | 39.87 | 46.90        | 44.53 | 53.43 |
| 457 | 28.47        | 26.19        | 22.56 | 22.78 | 33.01        | 32.34        | 30.68 | 29.66 | 54.70 | 45.30 | 49.22 | 39.87 | 46.93        | 44.54 | 53.42 |
| 458 | 28.46        | 26.22        | 22.57 | 22.75 | 32.98        | 32.37        | 30.73 | 29.62 | 54.70 | 45.30 | 49.16 | 39.87 | 46.93        | 44.51 | 53.41 |
| 459 | 28.46        | 26.22        | 22.57 | 22.75 | 32.96        | 32.37        | 30.77 | 29.62 | 54.70 | 45.30 | 49.13 | 39.87 | 46.96        | 44.50 | 53.33 |
| 460 | 28.31        | 26.22        | 22.78 | 22.69 | 32.88        | 32.00        | 31.28 | 29.76 | 54.50 | 45.50 | 49.07 | 39.92 | 47.42        | 44.50 | 53.97 |
| 461 | 28.16        | 25.96        | 22.77 | 23.11 | 32.38        | 31.33        | 31.40 | 30.72 | 54.10 | 45.90 | 49.35 | 39.91 | 48.36        | 44.63 | 54.15 |
| Avg | <b>28.34</b> | <b>26.03</b> | 22.70 | 22.93 | <b>32.69</b> | <b>31.58</b> | 31.31 | 30.33 | 54.37 | 45.63 | 49.15 | 39.83 | <b>47.91</b> | 44.49 | 53.84 |
| SD  | 0.15         | 0.23         | 0.16  | 0.20  | 0.63         | 0.76         | 0.68  | 0.62  | 0.27  | 0.27  | 0.22  | 0.16  | 0.71         | 0.15  | 0.35  |

ENC: effective number of codons; Avg: average; SD: standard deviation.

**B. Nucleotide composition analysis of ABLV coding sequences (%).**

| No  | A            | U            | G     | C     | A <sub>3</sub> | U <sub>3</sub> | G <sub>3</sub> | C <sub>3</sub> | AU    | GC    | GC <sub>1</sub> | GC <sub>2</sub> | GC <sub>3</sub> | GC <sub>12</sub> | ENC   |
|-----|--------------|--------------|-------|-------|----------------|----------------|----------------|----------------|-------|-------|-----------------|-----------------|-----------------|------------------|-------|
| 1   | 29.00        | 27.16        | 21.84 | 22.00 | 33.01          | 35.22          | 30.50          | 27.95          | 56.20 | 43.80 | 47.77           | 38.90           | 44.85           | 43.33            | 53.15 |
| 2   | 29.08        | 26.51        | 21.66 | 22.75 | 33.17          | 32.91          | 30.42          | 30.18          | 55.60 | 44.40 | 47.54           | 39.07           | 46.62           | 43.31            | 54.26 |
| 3   | 29.05        | 27.11        | 21.82 | 22.01 | 33.12          | 35.19          | 30.51          | 27.91          | 56.20 | 43.80 | 47.76           | 38.94           | 44.81           | 43.35            | 53.13 |
| 4   | 29.11        | 27.00        | 21.76 | 22.13 | 33.37          | 34.71          | 30.26          | 28.36          | 56.10 | 43.90 | 47.70           | 38.96           | 45.01           | 43.33            | 53.16 |
| 5   | 29.13        | 26.98        | 21.76 | 22.13 | 33.45          | 34.57          | 30.21          | 28.46          | 56.10 | 43.90 | 47.64           | 38.96           | 45.07           | 43.30            | 53.16 |
| 6   | 29.07        | 26.96        | 21.81 | 22.16 | 33.22          | 34.71          | 30.42          | 28.36          | 56.00 | 44.00 | 47.82           | 38.96           | 45.13           | 43.39            | 53.19 |
| Avg | <b>29.07</b> | <b>26.95</b> | 21.78 | 22.20 | <b>33.22</b>   | <b>34.55</b>   | 30.39          | 28.54          | 56.03 | 43.97 | 47.71           | 38.97           | 45.25           | 43.34            | 53.34 |
| SD  | 0.04         | 0.21         | 0.06  | 0.25  | 0.15           | 0.77           | 0.11           | 0.76           | 0.21  | 0.21  | 0.09            | 0.05            | 0.62            | 0.03             | 0.41  |

ENC: effective number of codons; Avg: average; SD: standard deviation.

**C. Nucleotide composition analysis of DUVV coding sequences (%).**

| No  | A            | U            | G     | C     | A <sub>3</sub> | U <sub>3</sub> | G <sub>3</sub> | C <sub>3</sub> | AU    | GC    | GC <sub>1</sub> | GC <sub>2</sub> | GC <sub>3</sub> | GC <sub>12</sub> | ENC   |
|-----|--------------|--------------|-------|-------|----------------|----------------|----------------|----------------|-------|-------|-----------------|-----------------|-----------------|------------------|-------|
| 1   | 28.80        | 26.43        | 22.03 | 22.73 | 33.28          | 32.36          | 30.38          | 30.05          | 55.20 | 44.80 | 47.88           | 39.55           | 46.84           | 43.72            | 53.34 |
| 2   | 28.95        | 26.40        | 21.98 | 22.67 | 33.94          | 32.15          | 30.12          | 29.84          | 55.40 | 44.60 | 47.81           | 39.63           | 46.51           | 43.72            | 53.22 |
| 3   | 28.92        | 26.46        | 21.94 | 22.69 | 33.87          | 32.33          | 29.78          | 30.02          | 55.40 | 44.60 | 47.84           | 39.61           | 46.42           | 43.72            | 53.18 |
| 4   | 29.35        | 26.66        | 21.56 | 22.43 | 35.14          | 33.02          | 28.41          | 29.49          | 56.00 | 44.00 | 47.57           | 39.45           | 44.95           | 43.51            | 52.17 |
| Avg | <b>29.01</b> | <b>26.49</b> | 21.88 | 22.63 | <b>34.06</b>   | <b>32.47</b>   | 29.67          | 29.85          | 55.50 | 44.50 | 47.77           | 39.56           | <b>46.18</b>    | 43.67            | 52.98 |
| SD  | 0.21         | 0.10         | 0.18  | 0.12  | 0.68           | 0.33           | 0.76           | 0.22           | 0.30  | 0.30  | 0.12            | 0.07            | 0.73            | 0.09             | 0.47  |

ENC: effective number of codons; Avg: average; SD: standard deviation.

**D. Nucleotide composition analysis of EBLV-1 coding sequences (%).**

| No  | A            | U            | G     | C     | A <sub>3</sub> | U <sub>3</sub> | G <sub>3</sub> | C <sub>3</sub> | AU    | GC    | GC <sub>1</sub> | GC <sub>2</sub> | GC <sub>3</sub> | GC <sub>12</sub> | ENC   |
|-----|--------------|--------------|-------|-------|----------------|----------------|----------------|----------------|-------|-------|-----------------|-----------------|-----------------|------------------|-------|
| 1   | 28.69        | 26.00        | 23.02 | 22.29 | 31.73          | 31.53          | 34.12          | 29.34          | 54.70 | 45.30 | 47.41           | 39.70           | 48.83           | 43.55            | 52.43 |
| 2   | 28.65        | 25.97        | 23.00 | 22.38 | 31.59          | 31.33          | 34.27          | 29.59          | 54.60 | 45.40 | 47.39           | 39.66           | 49.10           | 43.53            | 52.54 |
| 3   | 28.56        | 25.83        | 23.11 | 22.49 | 31.15          | 30.74          | 34.74          | 30.13          | 54.40 | 45.60 | 47.18           | 39.70           | 49.93           | 43.44            | 52.47 |
| 4   | 28.62        | 26.01        | 23.07 | 22.30 | 31.56          | 31.40          | 34.41          | 29.39          | 54.60 | 45.40 | 47.33           | 39.72           | 49.04           | 43.53            | 52.45 |
| 5   | 28.62        | 26.00        | 23.08 | 22.30 | 31.56          | 31.37          | 34.45          | 29.39          | 54.60 | 45.40 | 47.33           | 39.72           | 49.07           | 43.53            | 52.45 |
| 6   | 28.62        | 25.98        | 23.03 | 22.37 | 31.75          | 31.40          | 34.05          | 29.46          | 54.60 | 45.40 | 47.57           | 39.74           | 48.90           | 43.65            | 52.84 |
| 7   | 28.58        | 25.83        | 23.14 | 22.46 | 31.24          | 30.72          | 34.67          | 30.07          | 54.40 | 45.60 | 47.22           | 39.72           | 49.86           | 43.47            | 52.72 |
| 8   | 28.51        | 25.93        | 23.17 | 22.40 | 30.97          | 31.01          | 34.75          | 29.88          | 54.40 | 45.60 | 47.12           | 39.79           | 49.78           | 43.45            | 52.79 |
| 9   | 28.56        | 25.83        | 23.17 | 22.44 | 31.31          | 30.77          | 34.70          | 29.88          | 54.40 | 45.60 | 47.31           | 39.77           | 49.74           | 43.54            | 52.68 |
| 10  | 28.74        | 26.00        | 22.95 | 22.31 | 31.86          | 31.46          | 33.94          | 29.48          | 54.70 | 45.30 | 47.41           | 39.58           | 48.80           | 43.49            | 52.47 |
| 11  | 28.57        | 26.02        | 23.05 | 22.36 | 31.42          | 31.53          | 34.20          | 29.55          | 54.60 | 45.40 | 47.52           | 39.64           | 49.06           | 43.58            | 52.38 |
| 12  | 28.55        | 25.81        | 23.13 | 22.51 | 31.10          | 30.78          | 34.77          | 30.10          | 54.40 | 45.60 | 47.26           | 39.73           | 49.93           | 43.50            | 52.54 |
| 13  | 28.58        | 26.03        | 23.09 | 22.29 | 31.30          | 31.63          | 34.55          | 29.31          | 54.60 | 45.40 | 47.41           | 39.67           | 49.09           | 43.54            | 52.38 |
| 14  | 28.58        | 25.99        | 23.06 | 22.37 | 31.35          | 31.48          | 34.28          | 29.63          | 54.60 | 45.40 | 47.49           | 39.61           | 49.17           | 43.55            | 52.45 |
| 15  | 28.53        | 25.98        | 23.12 | 22.36 | 31.25          | 31.34          | 34.57          | 29.57          | 54.50 | 45.50 | 47.44           | 39.67           | 49.35           | 43.55            | 52.36 |
| Avg | <b>28.60</b> | <b>25.95</b> | 23.08 | 22.38 | <b>31.41</b>   | 31.23          | <b>34.43</b>   | 29.65          | 54.54 | 45.46 | 47.36           | 39.70           | <b>49.31</b>    | 43.53            | 52.53 |
| SD  | 0.06         | 0.08         | 0.06  | 0.07  | 0.25           | 0.32           | 0.27           | 0.28           | 0.11  | 0.11  | 0.12            | 0.06            | 0.40            | 0.05             | 0.15  |

ENC: effective number of codons; Avg: average; SD: standard deviation.

**E. Nucleotide composition analysis of LBV coding sequences (%).**

| No  | A            | U            | G     | C     | A <sub>3</sub> | U <sub>3</sub> | G <sub>3</sub> | C <sub>3</sub> | AU    | GC    | GC <sub>1</sub> | GC <sub>2</sub> | GC <sub>3</sub> | GC <sub>12</sub> | ENC   |
|-----|--------------|--------------|-------|-------|----------------|----------------|----------------|----------------|-------|-------|-----------------|-----------------|-----------------|------------------|-------|
| 1   | 29.09        | 26.86        | 22.44 | 21.61 | 34.00          | 33.71          | 32.42          | 26.66          | 55.90 | 44.10 | 47.50           | 39.32           | 45.33           | 43.41            | 52.58 |
| 2   | 29.09        | 26.79        | 22.51 | 21.61 | 34.00          | 33.45          | 32.68          | 26.68          | 55.90 | 44.10 | 47.45           | 39.38           | 45.53           | 43.41            | 52.78 |
| 3   | 30.25        | 28.61        | 20.91 | 20.22 | 37.42          | 38.89          | 27.60          | 22.63          | 58.90 | 41.10 | 46.03           | 39.03           | 38.33           | 42.53            | 51.08 |
| 4   | 30.27        | 27.99        | 21.06 | 20.68 | 38.05          | 37.41          | 26.97          | 23.65          | 58.30 | 41.70 | 46.71           | 39.57           | 38.96           | 43.14            | 51.74 |
| 5   | 30.48        | 28.07        | 20.80 | 20.65 | 38.83          | 37.57          | 26.17          | 23.56          | 58.60 | 41.40 | 46.60           | 39.47           | 38.28           | 43.04            | 51.52 |
| 6   | 29.13        | 26.69        | 22.41 | 21.77 | 34.09          | 33.16          | 32.24          | 27.24          | 55.80 | 44.20 | 47.48           | 39.38           | 45.71           | 43.43            | 52.93 |
| Avg | <b>29.72</b> | <b>27.50</b> | 21.69 | 21.09 | <b>36.07</b>   | <b>35.70</b>   | 29.68          | 25.07          | 57.23 | 42.77 | 46.96           | 39.36           | <b>42.02</b>    | 43.16            | 52.11 |
| SD  | 0.62         | 0.75         | 0.77  | 0.60  | 2.08           | 2.31           | 2.80           | 1.83           | 1.38  | 1.38  | 0.55            | 0.17            | 3.51            | 0.32             | 0.69  |

ENC: effective number of codons; Avg: average; SD: standard deviation.

**F. Nucleotide composition analysis of MOKV lyssavirus coding sequences (%).**

| No  | A            | U            | G     | C     | A <sub>3</sub> | U <sub>3</sub> | G <sub>3</sub> | C <sub>3</sub> | AU    | GC    | GC <sub>1</sub> | GC <sub>2</sub> | GC <sub>3</sub> | GC <sub>12</sub> | ENC   |
|-----|--------------|--------------|-------|-------|----------------|----------------|----------------|----------------|-------|-------|-----------------|-----------------|-----------------|------------------|-------|
| 1   | 28.45        | 26.06        | 22.78 | 22.71 | 32.33          | 31.56          | 32.23          | 30.03          | 54.50 | 45.50 | 48.58           | 39.66           | 48.23           | 44.12            | 53.76 |
| 2   | 28.67        | 26.72        | 22.40 | 22.21 | 33.35          | 33.12          | 30.84          | 28.82          | 55.40 | 44.60 | 47.95           | 39.76           | 46.12           | 43.86            | 53.00 |
| 3   | 28.84        | 26.35        | 22.52 | 22.29 | 33.35          | 32.91          | 31.24          | 28.79          | 55.20 | 44.80 | 48.62           | 39.44           | 46.36           | 44.03            | 52.69 |
| 4   | 28.82        | 26.38        | 22.50 | 22.30 | 33.26          | 33.02          | 31.22          | 28.76          | 55.20 | 44.80 | 48.62           | 39.44           | 46.33           | 44.03            | 52.64 |
| 5   | 28.71        | 26.50        | 22.54 | 22.25 | 32.94          | 33.07          | 31.44          | 28.95          | 55.20 | 44.80 | 48.78           | 38.99           | 46.61           | 43.88            | 52.67 |
| 6   | 28.98        | 26.18        | 22.21 | 22.62 | 34.43          | 31.26          | 30.04          | 30.41          | 55.20 | 44.80 | 48.10           | 39.49           | 46.91           | 43.80            | 52.74 |
| Avg | <b>28.74</b> | <b>26.37</b> | 22.49 | 22.40 | <b>33.28</b>   | <b>32.49</b>   | 31.17          | 29.29          | 55.12 | 44.88 | 48.44           | 39.46           | <b>46.76</b>    | 43.95            | 52.92 |
| SD  | 0.17         | 0.21         | 0.17  | 0.19  | 0.63           | 0.77           | 0.66           | 0.67           | 0.29  | 0.29  | 0.30            | 0.24            | 0.70            | 0.11             | 0.40  |

ENC: effective number of codons; Avg: average; SD: standard deviation.
