# Supplementary material for: Comprehensive Analysis of Codon Usage on Rabies Virus and Other Lyssaviruses
Source: MDPI journal article supplement (doi:10.3390/ijms19082397), 2018-08-14
Supplement: s1 [file s1]

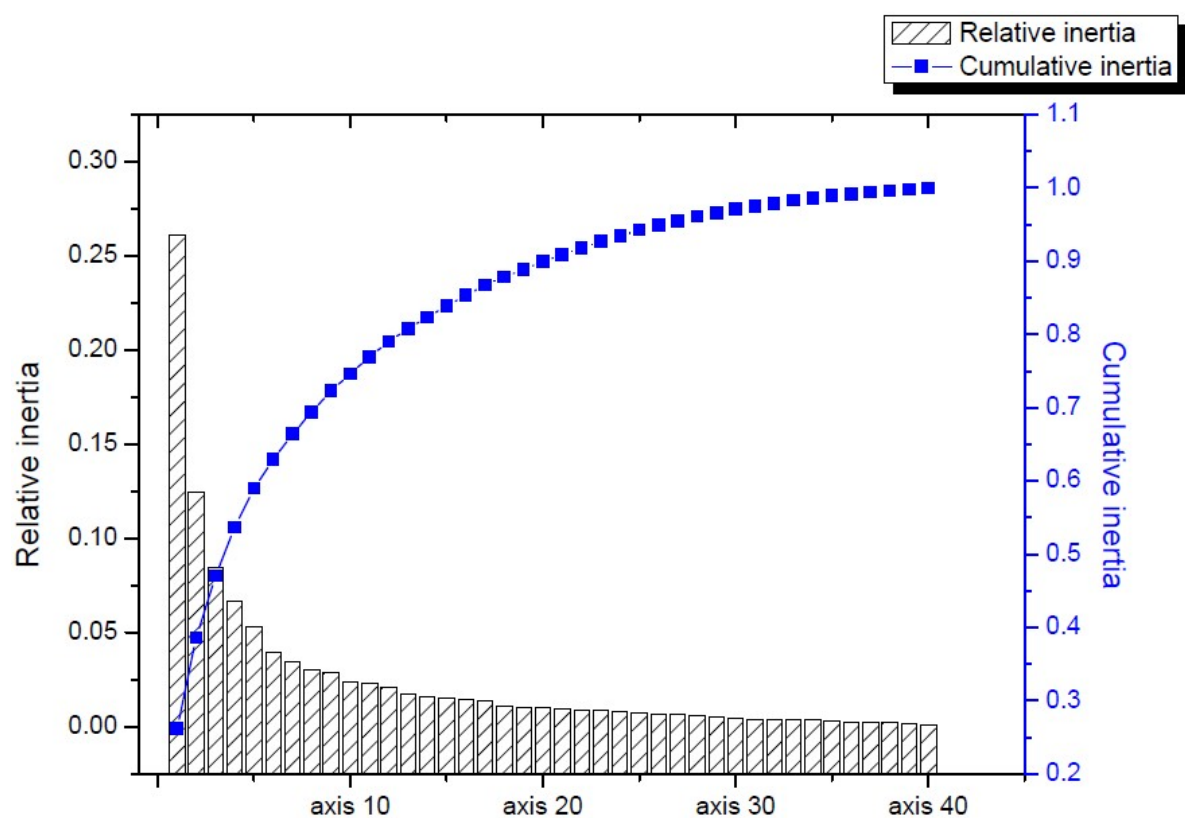

**Figure S1.** The relative and cumulative inertia of the first 40 axes accounting for 100% of the 59 axes.

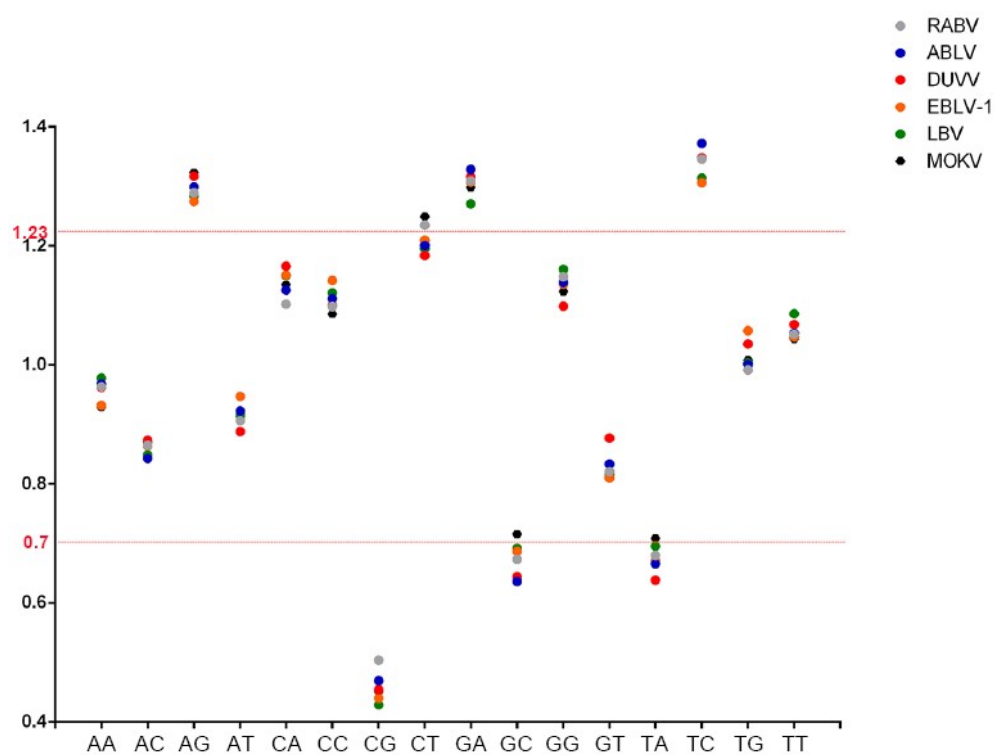

**Figure S2.** Dinucleotide frequency analysis. Table S1. Characteristic of lyssavirus genomes. Table S2. Nucleotide composition analysis.
