# Supplementary material for: Comprehensive Analysis of Codon Usage on Rabies Virus and Other Lyssaviruses
Source: MDPI journal article supplement (doi:10.3390/ijms19082397), 2018-08-14
Supplement: s1 [file s1]

**Supplemental table 4 Characteristic of lyssavirus genomes analyzed in present study.**

**A. Characteristic of RABV genomes analyzed in present study.**

| No | Accession | Name              | Host                    | Country          | Year |
|----|-----------|-------------------|-------------------------|------------------|------|
| 1  | AB569299  | H-08-1320         | Homo sapiens            | Sri Lanka        | 2008 |
| 2  | AB635373  | H-1413-09         | Paradoxurus zeylonensis | Sri Lanka        | 2009 |
| 3  | EF437215  | NNV-RAB-H         | Homo sapiens            | India            | —    |
| 4  | EU293113  | 9001FRA           | dog                     | Guyana           | 1990 |
| 5  | EU293115  | 9147FRA           | fox                     | France           | 1991 |
| 6  | EU293116  | 9704ARG           | Tadarida brasiliensis   | Argentina        | 1997 |
| 7  | EU886632  | 2002 from Germany | red fox                 | Germany          | 2002 |
| 8  | EU886633  | 2004 from Austria | red fox                 | Austria          | 2004 |
| 9  | EU886634  | 2004 from Germany | red fox                 | Germany          | 2004 |
| 10 | EU886635  | 2005 from Germany | red fox                 | Germany          | 2005 |
| 11 | EU886636  | 2006 from Austria | red fox                 | Austria          | 2006 |
| 12 | FJ866835  | FJ008             | dog                     | China: Fujian    | 2008 |
| 13 | FJ866836  | FJ009             | dog                     | China: Fujian    | 2008 |
| 14 | GU345746  | CQ92              | dog                     | China: Chongqing | 1992 |
| 15 | GU345747  | J                 | Homo sapiens            | China: Ningxia   | 1986 |
| 16 | GU345748  | SH06              | dog                     | China: Shanghai  | 2006 |
| 17 | HE802675  | Pk23              | Bos taurus              | Pakistan         | 2010 |
| 18 | HQ450385  | DRV-AH08          | dog                     | China            | 2008 |
| 19 | JN234411  | 4aGV              | dog                     | China            | 1931 |
| 20 | JN609295  | FJDRV             | Canis lupus familiaris  | China            | 2008 |
| 21 | JQ423952  | BJ2011E           | equine                  | China            | 2011 |
| 22 | JQ647510  | WH11              | donkey                  | China            | 2011 |

|    |          |               |                                  |     |      |
|----|----------|---------------|----------------------------------|-----|------|
| 23 | JQ685892 | 2398          | gray fox                         | USA | 2009 |
| 24 | JQ685893 | SM5079        | striped skunk                    | USA | 2001 |
| 25 | JQ685894 | CA982         | striped skunk                    | USA | 1994 |
| 26 | JQ685895 | WA1185        | <i>Lasionycteris noctivagans</i> | USA | 2003 |
| 27 | JQ685896 | 2402          | gray fox                         | USA | 2009 |
| 28 | JQ685897 | SM5442        | <i>Eptesicus fuscus</i>          | USA | 2001 |
| 29 | JQ685898 | A093500       | <i>Eptesicus fuscus</i>          | USA | 2009 |
| 30 | JQ685899 | A10-0515      | gray fox                         | USA | 2009 |
| 31 | JQ685900 | FL769         | <i>Lasiurus seminolus</i>        | USA | 2003 |
| 32 | JQ685902 | TN209         | <i>Lasiurus borealis</i>         | USA | 2005 |
| 33 | JQ685903 | CA04148       | <i>Eptesicus fuscus</i>          | USA | 2004 |
| 34 | JQ685904 | SM5081        | striped skunk                    | USA | 2001 |
| 35 | JQ685905 | FL385         | <i>Tadarida brasiliensis</i>     | USA | 2003 |
| 36 | JQ685906 | SM5102        | striped skunk                    | USA | 2001 |
| 37 | JQ685907 | SM3849        | <i>Eptesicus fuscus</i>          | USA | 1996 |
| 38 | JQ685909 | CA100         | <i>Eptesicus fuscus</i>          | USA | 2005 |
| 39 | JQ685910 | TX5960        | <i>Lasiurus xanthinus</i>        | USA | 2002 |
| 40 | JQ685911 | SM5077        | striped skunk                    | USA | 2001 |
| 41 | JQ685912 | 2400          | gray fox                         | USA | 2009 |
| 42 | JQ685913 | AZBAT-6763    | <i>Eptesicus fuscus</i>          | USA | 1985 |
| 43 | JQ685914 | OR703         | gray fox                         | USA | 2010 |
| 44 | JQ685915 | TX4904        | <i>Lasiurus intermedius</i>      | USA | 2002 |
| 45 | JQ685916 | FL1010        | <i>Lasiurus intermedius</i>      | USA | 2002 |
| 46 | JQ685917 | CO-Coyot-2010 | coyote                           | USA | 2010 |
| 47 | JQ685918 | OR05506       | gray fox                         | USA | 2010 |

|    |          |             |                                    |        |      |
|----|----------|-------------|------------------------------------|--------|------|
| 48 | JQ685919 | NJ2262      | Lasiurus borealis                  | USA    | 2005 |
| 49 | JQ685920 | EF          | Eptesicus fuscus                   | USA    | 1984 |
| 50 | JQ685921 | FL1078      | Myotis austroriparius              | USA    | 2001 |
| 51 | JQ685922 | TN186       | Perimyotis subflavus               | USA    | 2005 |
| 52 | JQ685923 | SM4871      | Eptesicus fuscus                   | USA    | 1999 |
| 53 | JQ685925 | WAEF03      | Eptesicus fuscus                   | USA    | 2004 |
| 54 | JQ685926 | AZ2408      | Eptesicus fuscus                   | USA    | 2005 |
| 55 | JQ685927 | SM5080      | striped skunk                      | USA    | 2001 |
| 56 | JQ685928 | 2403        | gray fox                           | USA    | 2009 |
| 57 | JQ685929 | MEXSK3644   | Spilogale putorius (Spotted skunk) | Mexico | 2009 |
| 58 | JQ685930 | SM5103      | striped skunk                      | USA    | 2001 |
| 59 | JQ685931 | WA0173      | Eptesicus fuscus                   | USA    | 2000 |
| 60 | JQ685932 | SM5076      | striped skunk                      | USA    | 2001 |
| 61 | JQ685933 | SM5950      | gray fox                           | USA    | 2004 |
| 62 | JQ685934 | 2401        | gray fox                           | USA    | 2009 |
| 63 | JQ685936 | 3634DR      | bovine                             | Mexico | 2009 |
| 64 | JQ685937 | 2396        | Bassariscus astutus                | USA    | 2009 |
| 65 | JQ685938 | A10-0514    | striped skunk                      | USA    | 2009 |
| 66 | JQ685939 | 2399        | gray fox                           | USA    | 2009 |
| 67 | JQ685940 | SM5100      | striped skunk                      | USA    | 2001 |
| 68 | JQ685941 | SM1545      | striped skunk                      | USA    | 2005 |
| 69 | JQ685942 | AZBAT-65094 | Eptesicus fuscus                   | USA    | 1981 |
| 70 | JQ685943 | A10-0511    | gray fox                           | USA    | 2009 |
| 71 | JQ685944 | NC839       | striped skunk                      | USA    | 1984 |
| 72 | JQ685945 | SM6709      | domestic cat (Felis catus)         | USA    | 2005 |

|    |          |            |                                    |        |      |
|----|----------|------------|------------------------------------|--------|------|
| 73 | JQ685946 | SM4862     | Eptesicus fuscus                   | USA    | 1999 |
| 74 | JQ685947 | TN310      | Lasiurus cinereus                  | USA    | 2004 |
| 75 | JQ685948 | OR05455    | gray fox                           | USA    | 2010 |
| 76 | JQ685949 | SM5075     | striped skunk                      | USA    | 2001 |
| 77 | JQ685950 | A093504    | Eptesicus fuscus                   | USA    | 2009 |
| 78 | JQ685951 | AZ10-144   | Eptesicus fuscus                   | USA    | 2010 |
| 79 | JQ685952 | A02-2971   | Parastrellus hesperus              | USA    | 2002 |
| 80 | JQ685953 | 3645DR     | Homo sapiens                       | Mexico | 2009 |
| 81 | JQ685954 | MEXSK13938 | Spilogale putorius (Spotted skunk) | Mexico | 2007 |
| 82 | JQ685955 | AZ4490     | Myotis yumanensis                  | USA    | 2005 |
| 83 | JQ685956 | AZBAT-7453 | Eptesicus fuscus                   | USA    | 1975 |
| 84 | JQ685957 | OR8767     | gray fox                           | USA    | 2009 |
| 85 | JQ685958 | SM5101     | striped skunk                      | USA    | 2001 |
| 86 | JQ685959 | SM5451     | striped skunk                      | USA    | 2001 |
| 87 | JQ685960 | SM4872     | Eptesicus fuscus                   | USA    | 2001 |
| 88 | JQ685961 | AZ10-140   | Eptesicus fuscus                   | USA    | 2010 |
| 89 | JQ685962 | SM5441     | striped skunk                      | USA    | 2001 |
| 90 | JQ685963 | Coati-3639 | Nasua narica (coati)               | Mexico | 2009 |
| 91 | JQ685964 | SM5596     | striped skunk                      | USA    | 2004 |
| 92 | JQ685965 | A02-2972   | Parastrellus hesperus              | USA    | 2002 |
| 93 | JQ685966 | SM5470     | striped skunk                      | USA    | 2001 |
| 94 | JQ685968 | A10-0512   | striped skunk                      | USA    | 2009 |
| 95 | JQ685970 | CASK2      | striped skunk                      | USA    | 1974 |
| 96 | JQ685971 | AZ3003     | Antrozous pallidus                 | USA    | 2009 |
| 97 | JQ685972 | 2395       | gray fox                           | USA    | 2009 |

|     |          |           |                                          |             |      |
|-----|----------|-----------|------------------------------------------|-------------|------|
| 98  | JQ685973 | A11-1043  | coyote                                   | USA         | 2011 |
| 99  | JQ685974 | SM3844    | Eptesicus fuscus                         | USA         | 1995 |
| 100 | JQ685975 | MEXSK3636 | Spilogale putorius (Spotted skunk)       | Mexico      | 2009 |
| 101 | JQ685976 | 2526      | gray fox                                 | USA         | 2009 |
| 102 | JQ944704 | 184VNO    | raccoon dog                              | Russia      | 2009 |
| 103 | JQ944705 | 1350KRA   | dog                                      | Russia      | 2008 |
| 104 | JQ944706 | 1352KRA   | dog                                      | Russia      | 2008 |
| 105 | JQ944707 | 1410KOM   | deer                                     | Russia      | 2008 |
| 106 | JQ944708 | 1564NNO   | red fox                                  | Russia      | 2008 |
| 107 | JQ970481 | CJS0621D  | dog                                      | China       | 2006 |
| 108 | JQ970482 | CJS0636D  | dog                                      | China       | 2006 |
| 109 | JQ970483 | CJS0848D  | dog                                      | China       | 2008 |
| 110 | JQ970484 | CJX0903D  | dog                                      | China       | 2009 |
| 111 | JQ970485 | CJX0906D  | dog                                      | China       | 2009 |
| 112 | JQ970486 | CSD0708D  | dog                                      | China       | 2007 |
| 113 | JQ970487 | CSX0904D  | dog                                      | China       | 2009 |
| 114 | JX473838 | 178J09    | jackal                                   | Namibia     | 2009 |
| 115 | JX473839 | 192J09    | jackal                                   | Namibia     | 2009 |
| 116 | JX473840 | 239K09    | Tragelaphus strepsiceros (Namibian kudu) | Namibia     | 2009 |
| 117 | JX473841 | 240K09    | Tragelaphus strepsiceros (Namibian kudu) | Namibia     | 2009 |
| 118 | KC169986 | GXHXN     | rabid cattle                             | China       | 2009 |
| 119 | KC171644 | BD0406CC  | raccoon dog                              | South Korea | 2004 |
| 120 | KC171645 | BV9901PJ  | raccoon dog                              | South Korea | 1999 |

|     |          |                        |                                   |                          |      |
|-----|----------|------------------------|-----------------------------------|--------------------------|------|
| 121 | KC193267 | CNM1101C               | cow                               | China                    | 2011 |
| 122 | KC196743 | DRV-NG11               | dog                               | Nigeria                  | 2011 |
| 123 | KC252633 | CNM1103C               | bovine                            | China                    | 2011 |
| 124 | KC252634 | CNM1104D               | dog                               | China                    | 2011 |
| 125 | KC595280 | Rus(Lipetsk)8052f_2011 | Vulpes vulpes (red fox)           | Russia                   | 2011 |
| 126 | KC595281 | Rus(Lipetsk)8053c_2011 | cat                               | Russia                   | 2011 |
| 127 | KC595282 | Rus(Lipetsk)8054f_2011 | Vulpes vulpes (red fox)           | Russia                   | 2011 |
| 128 | KC595283 | Rus(Lipetsk)8057f_2011 | Vulpes vulpes (red fox)           | Russia                   | 2011 |
| 129 | KC737850 | A11-5300               | Homo sapiens                      | USA                      | 2011 |
| 130 | KC762941 | JX09-17(fb)            | Melogale moschata                 | China                    | 2009 |
| 131 | KC977995 | Shaanxi-HZ-6           | canine                            | China                    | 2009 |
| 132 | KF154996 | RV61                   | Homo sapiens                      | United Kingdom           | 1987 |
| 133 | KF154997 | RV437                  | raccoon dog                       | Estonia                  | —    |
| 134 | KF154998 | RV2324                 | dog                               | Israel                   | 1950 |
| 135 | KF154999 | RV2417                 | dog                               | United Kingdom           | 2008 |
| 136 | KF155000 | RV2516                 | cow                               | Iraq                     | 2010 |
| 137 | KF155001 | RV2627                 | cow                               | Morocco                  | 2009 |
| 138 | KF155002 | RV2772                 | dog                               | Tanzania                 | 2010 |
| 139 | KF620487 | R2012-26               | ferret badger                     | Taiwan                   | 2012 |
| 140 | KF620489 | R2013-01               | ferret badger                     | Taiwan                   | 2013 |
| 141 | KF726853 | JX10-37                | Melogale moschata (ferret badger) | China                    | 2010 |
| 142 | KF977826 | CAR_11/001h            | Homo sapiens                      | Central African Republic | 2011 |
| 143 | KJ004416 | JZ13-Lv                | Homo sapiens                      | China                    | 2013 |
| 144 | KJ564280 | IMDRV-13               | Dama dama (fallow deer)           | China                    | 2013 |

|     |          |                     |                          |          |      |
|-----|----------|---------------------|--------------------------|----------|------|
| 145 | KM016899 | WQ14-RF             | red fox                  | China    | 2014 |
| 146 | KM272192 | CQH1202D/China/2012 | dog                      | China    | 2012 |
| 147 | KM594023 | IP6634/08           | Callithrix jacchus       | Brazil   | 2008 |
| 148 | KM594025 | IP5402/07           | Callithrix jacchus       | Brazil   | 2007 |
| 149 | KM594026 | IP512/09            | Eptesicus furinalis      | Brazil   | 2009 |
| 150 | KM594027 | IP230/10            | Eptesicus furinalis      | Brazil   | 2010 |
| 151 | KM594028 | IP346/10            | Eptesicus furinalis      | Brazil   | 2010 |
| 152 | KM594029 | IP3208/06           | Eptesicus furinalis      | Brazil   | 2006 |
| 153 | KM594030 | IP1400/10           | Myotis nigricans         | Brazil   | 2010 |
| 154 | KM594031 | IP163/10            | Myotis nigricans         | Brazil   | 2010 |
| 155 | KM594032 | IP497/10            | Myotis nigricans         | Brazil   | 2010 |
| 156 | KM594033 | IP4431/10           | Tadarida brasiliensis    | Brazil   | 2010 |
| 157 | KM594034 | IP350/10            | Nyctinomops laticaudatus | Brazil   | 2010 |
| 158 | KM594035 | IP412/10            | Nyctinomops laticaudatus | Brazil   | 2010 |
| 159 | KM594036 | IP542/10            | Nyctinomops laticaudatus | Brazil   | 2010 |
| 160 | KM594037 | IP3176/09           | Tadarida brasiliensis    | Brazil   | 2009 |
| 161 | KM594038 | IP1586/10           | Tadarida brasiliensis    | Brazil   | 2010 |
| 162 | KM594039 | IP7841/09           | Cercopithecus thomasi    | Brazil   | 2009 |
| 163 | KM594040 | IP2992/13           | Desmodus rotundus        | Brazil   | 2013 |
| 164 | KM594041 | IP2990/13           | Desmodus rotundus        | Brazil   | 2013 |
| 165 | KM594042 | IP2991/13           | Desmodus rotundus        | Brazil   | 2013 |
| 166 | KM594043 | IP4005/12           | Bos taurus               | Brazil   | 2012 |
| 167 | KP723638 | RV2985              | Canis simensis           | Ethiopia | 2014 |
| 168 | KP997032 | PO-01_2014_Primorye | Ursus arctos             | Russia   | 2014 |
| 169 | KR230089 | SXBJ15              | cattle                   | China    | 2015 |

|     |          |        |              |          |      |
|-----|----------|--------|--------------|----------|------|
| 170 | KR230090 | SXYL15 | cattle       | China    | 2015 |
| 171 | KR534217 | RV2490 | domestic dog | Tanzania | 2008 |
| 172 | KR534218 | RV2491 | domestic dog | Tanzania | 2008 |
| 173 | KR534219 | RV2492 | domestic dog | Tanzania | 2007 |
| 174 | KR534232 | RV2792 | jackal       | Tanzania | 2011 |
| 175 | KR534233 | RV2794 | domestic dog | Tanzania | 2011 |
| 176 | KR534234 | RV2795 | cow          | Tanzania | 2011 |
| 177 | KR534235 | RV2796 | cow          | Tanzania | 2011 |
| 178 | KR534236 | RV2797 | cow          | Tanzania | 2011 |
| 179 | KR534245 | RV2890 | cow          | Tanzania | 2011 |
| 180 | KR534247 | RV2892 | domestic dog | Tanzania | 2011 |
| 181 | KR534248 | RV2893 | cow          | Tanzania | 2011 |
| 182 | KR534250 | RV2897 | domestic dog | Tanzania | 2011 |
| 183 | KR534251 | RV2898 | domestic dog | Tanzania | 2011 |
| 184 | KR534252 | RV2899 | domestic dog | Tanzania | 2011 |
| 185 | KR534254 | RV2906 | cat          | Tanzania | 2011 |
| 186 | KR906734 | RV2495 | domestic dog | Tanzania | 2008 |
| 187 | KR906735 | RV2498 | domestic dog | Tanzania | 2008 |
| 188 | KR906736 | RV2499 | domestic dog | Tanzania | 2008 |
| 189 | KR906738 | RV2501 | cow          | Tanzania | 2004 |
| 190 | KR906739 | RV2502 | domestic dog | Tanzania | 2004 |
| 191 | KR906740 | RV2503 | wild cat     | Tanzania | 2009 |
| 192 | KR906741 | RV2504 | domestic dog | Tanzania | 2003 |
| 193 | KR906742 | RV2767 | domestic dog | Tanzania | 2009 |
| 194 | KR906743 | RV2770 | domestic dog | Tanzania | 2010 |



|     |          |        |              |          |      |
|-----|----------|--------|--------------|----------|------|
| 195 | KR906744 | RV2771 | domestic dog | Tanzania | 2010 |
| 196 | KR906745 | RV2773 | domestic dog | Tanzania | 2010 |
| 197 | KR906746 | RV2774 | domestic dog | Tanzania | 2010 |
| 198 | KR906747 | RV2775 | domestic dog | Tanzania | 2010 |
| 199 | KR906749 | RV2777 | domestic dog | Tanzania | 2010 |
| 200 | KR906750 | RV2778 | domestic dog | Tanzania | 2010 |
| 201 | KR906751 | RV2780 | domestic dog | Tanzania | 2011 |
| 202 | KR906752 | RV2782 | domestic dog | Tanzania | 2011 |
| 203 | KR906753 | RV2783 | cow          | Tanzania | 2011 |
| 204 | KR906754 | RV2784 | domestic dog | Tanzania | 2011 |
| 205 | KR906755 | RV2793 | domestic dog | Tanzania | 2011 |
| 206 | KR906756 | RV2799 | domestic dog | Tanzania | 2011 |
| 207 | KR906760 | RV2810 | domestic dog | Tanzania | 2010 |
| 208 | KR906762 | RV2813 | domestic dog | Tanzania | 2010 |
| 209 | KR906763 | RV2814 | domestic dog | Tanzania | 2010 |
| 210 | KR906765 | RV2816 | domestic dog | Tanzania | 2010 |
| 211 | KR906766 | RV2817 | domestic dog | Tanzania | 2010 |
| 212 | KR906767 | RV2861 | domestic dog | Tanzania | 2011 |
| 213 | KR906768 | RV2862 | domestic dog | Tanzania | 2011 |
| 214 | KR906770 | RV2875 | domestic dog | Tanzania | 2011 |
| 215 | KR906771 | RV2894 | domestic dog | Tanzania | 2011 |
| 216 | KR906772 | RV2896 | domestic dog | Tanzania | 2011 |
| 217 | KR906773 | RV2900 | domestic dog | Tanzania | 2011 |
| 218 | KR906776 | RV2907 | domestic dog | Tanzania | 2011 |
| 219 | KR906777 | RV3091 | unknown      | Tanzania | 2011 |

|     |          |                           |                        |              |      |
|-----|----------|---------------------------|------------------------|--------------|------|
| 220 | KR906778 | RV3093                    | unknown                | Tanzania     | 2011 |
| 221 | KR906780 | RV3104                    | domestic dog           | Tanzania     | 2011 |
| 222 | KR906781 | RV3107                    | unknown                | Tanzania     | 2012 |
| 223 | KR906782 | RV3111                    | domestic dog           | Tanzania     | 2012 |
| 224 | KR906784 | RV3125                    | domestic dog           | Tanzania     | 2012 |
| 225 | KR906785 | RV3127                    | unknown                | Tanzania     | 2012 |
| 226 | KR906787 | RV3131                    | cow                    | Tanzania     | 2012 |
| 227 | KR906788 | RV3132                    | cow                    | Tanzania     | 2012 |
| 228 | KR906789 | RV3133                    | domestic dog           | Tanzania     | 2012 |
| 229 | KR906790 | RV3140                    | domestic dog           | Tanzania     | 2012 |
| 230 | KR906792 | RV3123                    | domestic dog           | Tanzania     | 2012 |
| 231 | KT006769 | InDRE3944                 | dog                    | Mexico       | 2013 |
| 232 | KT336432 | 55612                     | Canis lupus familiaris | South Africa | 2012 |
| 233 | KT336433 | 20034                     | Canis lupus familiaris | Zimbabwe     | 1991 |
| 234 | KT336434 | 21057                     | Canis lupus familiaris | Zimbabwe     | 1992 |
| 235 | KT336435 | 21467                     | Canis lupus familiaris | Zimbabwe     | 1993 |
| 236 | KT336436 | 33512                     | Canis lupus familiaris | South Africa | 2012 |
| 237 | KT336437 | 34312                     | Canis lupus familiaris | South Africa | 2012 |
| 238 | KT728348 | Rus(Astrakhan)_8329H_2003 | Homo sapiens           | Russia       | 2003 |
| 239 | KT728349 | Rus(Astrakhan)_8330H_2003 | Homo sapiens           | Russia       | 2003 |
| 240 | KU198460 | 89V809AFX                 | Alopex lagopus         | USA          | 1989 |
| 241 | KU198461 | 90L2968AFX                | Alopex lagopus         | Canada       | 1990 |
| 242 | KU198462 | 90V814AFX                 | Alopex lagopus         | USA          | 1990 |
| 243 | KU198463 | 90V820RFX                 | Vulpes vulpes          | USA          | 1990 |
| 244 | KU198464 | 91L0085AFX                | Alopex lagopus         | Canada       | 1991 |

|     |          |                      |                     |               |      |
|-----|----------|----------------------|---------------------|---------------|------|
| 245 | KU198465 | 92N7894RFX           | Vulpes vulpes       | Canada        | 1992 |
| 246 | KU198466 | 93N1395AFX           | Alopex lagopus      | Canada        | 1993 |
| 247 | KU198467 | 97L1793AFX           | Alopex lagopus      | Canada        | 1997 |
| 248 | KU198468 | 00N3340RFX           | Vulpes vulpes       | Canada        | 2000 |
| 249 | KU198469 | 01N10254RFX          | Vulpes vulpes       | Canada        | 2001 |
| 250 | KU198470 | 02N2980RFX           | Vulpes vulpes       | Canada        | 2002 |
| 251 | KU198471 | 07V1483RFX           | Vulpes vulpes       | USA           | 2007 |
| 252 | KU198472 | 12L1020AFX           | Alopex lagopus      | Canada        | 2012 |
| 253 | KU198473 | 12N0215RFX           | Vulpes vulpes       | Canada        | 2012 |
| 254 | KU198474 | 12N0280RFX           | Vulpes vulpes       | Canada        | 2012 |
| 255 | KU198475 | 13L0040AFX           | Alopex lagopus      | Canada        | 2013 |
| 256 | KU198476 | 13L0094AFX           | Alopex lagopus      | Canada        | 2013 |
| 257 | KU198477 | 13N0473AFX           | Alopex lagopus      | Canada        | 2013 |
| 258 | KU198478 | 13NO643AFX           | Alopex lagopus      | Canada        | 2013 |
| 259 | KU198479 | 14N0601RFX           | Vulpes vulpes       | Canada        | 2014 |
| 260 | KU523255 | AT6                  | Desmodus rotundus   | French Guiana | 2010 |
| 261 | KX036361 | RV1391-GRL-1-F-1990  | Arctic fox          | Greenland     | 1990 |
| 262 | KX036363 | RV1416-GRL-5-AF-2002 | Arctic fox          | Greenland     | 2002 |
| 263 | KX036364 | RV1417-GRL-3-AF-2002 | Arctic fox          | Greenland     | 2002 |
| 264 | KX036365 | RV1418-GRL-4-AF-2002 | Arctic fox          | Greenland     | 2002 |
| 265 | KX036366 | RV1419-GRL-3-AF-2002 | Arctic fox          | Greenland     | 2002 |
| 266 | KX036367 | RV1420-GRL-4-AF-2002 | Arctic fox          | Greenland     | 2002 |
| 267 | KX148100 | 09035FRA             | Stenodermatinae sp. | French Guiana | 2009 |
| 268 | KX148101 | 86092EGY             | Homo sapiens        | Egypt         | 1979 |
| 269 | KX148102 | 91026MEX             | dog                 | Mexico        | 1991 |

|     |          |          |              |              |      |
|-----|----------|----------|--------------|--------------|------|
| 270 | KX148103 | 87021AFS | Homo sapiens | South Africa | 1981 |
| 271 | KX148104 | 86058YOU | cow          | Montenegro   | 1978 |
| 272 | KX148105 | 86083GRO | dog          | Greenland    | 1980 |
| 273 | KX148106 | 91005USA | fox          | USA          | 1990 |
| 274 | KX148107 | 86097BEN | cat          | Benin        | 1986 |
| 275 | KX148108 | 11001NEP | cattle       | Nepal        | 2011 |
| 276 | KX148109 | 86117BRE | dog          | Brazil       | 1986 |
| 277 | KX148110 | 91014MEX | dog          | Mexico       | 1991 |
| 278 | KX148111 | 91015MEX | dog          | Mexico       | 1991 |
| 279 | KX148112 | 91010MEX | Homo sapiens | Mexico       | 1991 |
| 280 | KX148113 | 92002GER | fox          | Germany      | 1991 |
| 281 | KX148114 | 96104POL | fox          | Poland       | 1995 |
| 282 | KX148115 | 96250POL | fox          | Poland       | 1996 |
| 283 | KX148116 | 96256POL | fox          | Poland       | 1996 |
| 284 | KX148117 | 97046POL | fox          | Poland       | 1997 |
| 285 | KX148118 | 96077POL | raccoon dog  | Poland       | 1994 |
| 286 | KX148119 | 96045POL | fox          | Poland       | 1993 |
| 287 | KX148120 | 96140POL | raccoon dog  | Poland       | 1993 |
| 288 | KX148121 | 96056POL | fox          | Poland       | 1993 |
| 289 | KX148122 | 92012GER | fox          | Germany      | 1991 |
| 290 | KX148123 | 92017GER | fox          | Germany      | 1991 |
| 291 | KX148124 | 92010GER | fox          | Germany      | 1991 |
| 292 | KX148125 | 94033BEL | fox          | Belgium      | 1994 |
| 293 | KX148126 | 96002FRA | fox          | France       | 1996 |
| 294 | KX148127 | 91047FRA | fox          | France       | 1991 |

|     |          |          |             |                           |      |
|-----|----------|----------|-------------|---------------------------|------|
| 295 | KX148128 | 92044FRA | fox         | France                    | 1992 |
| 296 | KX148129 | 94091SLN | fox         | Slovenia                  | 1994 |
| 297 | KX148130 | 94096SLN | fox         | Slovenia                  | 1994 |
| 298 | KX148131 | 94086SLN | fox         | Slovenia                  | 1994 |
| 299 | KX148132 | 94094SLN | fox         | Slovenia                  | 1994 |
| 300 | KX148133 | 86111YOU | fox         | Bosnia and<br>Herzegovina | 1986 |
| 301 | KX148134 | 94029FRA | fox         | France                    | 1994 |
| 302 | KX148135 | 92001GER | fox         | Germany                   | 1991 |
| 303 | KX148136 | 93083HON | fox         | Hungary                   | 1993 |
| 304 | KX148137 | 93089HON | fox         | Hungary                   | 1993 |
| 305 | KX148138 | 93091HON | fox         | Hungary                   | 1993 |
| 306 | KX148139 | 93093HON | fox         | Hungary                   | 1993 |
| 307 | KX148140 | 86109YOU | fox         | Serbia                    | 1986 |
| 308 | KX148141 | 96135POL | fox         | Poland                    | 1992 |
| 309 | KX148142 | 96177POL | fox         | Poland                    | 1994 |
| 310 | KX148143 | 93080HON | fox         | Hungary                   | 1993 |
| 311 | KX148145 | 86054YOU | wolf        | Bosnia and<br>Herzegovina | 1986 |
| 312 | KX148146 | 93046FIN | fox         | Finland                   | 1993 |
| 313 | KX148147 | 93048FIN | raccoon dog | Finland                   | 1988 |
| 314 | KX148148 | 93038EST | fox         | Estonia                   | 1992 |
| 315 | KX148149 | 93039EST | raccoon dog | Estonia                   | 1991 |
| 316 | KX148150 | 96026POL | raccoon dog | Poland                    | 1986 |
| 317 | KX148151 | 96042POL | fox         | Poland                    | 1996 |

|     |          |          |              |                      |      |
|-----|----------|----------|--------------|----------------------|------|
| 318 | KX148152 | 96142POL | raccoon dog  | Poland               | 1996 |
| 319 | KX148153 | 96097POL | raccoon dog  | Poland               | 1996 |
| 320 | KX148154 | 97078POL | raccoon dog  | Poland               | 1997 |
| 321 | KX148155 | 93041EST | fox          | Estonia              | 1993 |
| 322 | KX148156 | 93042EST | raccoon dog  | Estonia              | 1991 |
| 323 | KX148157 | 93043EST | raccoon dog  | Estonia              | 1993 |
| 324 | KX148158 | 93105EST | fox          | Estonia              | 1993 |
| 325 | KX148159 | 86082IRA | sheep        | Iran                 | 1974 |
| 326 | KX148160 | 92015HON | Homo sapiens | Hungary              | 1991 |
| 327 | KX148161 | 86133SER | fox          | Serbia               | 1972 |
| 328 | KX148162 | 94002TUR | dog          | Turkey               | 1993 |
| 329 | KX148163 | 94016TUR | dog          | Turkey               | 1993 |
| 330 | KX148164 | 93100TUR | dog          | Turkey               | 1993 |
| 331 | KX148165 | 94009TUR | dog          | Turkey               | 1993 |
| 332 | KX148166 | 94001TUR | dog          | Turkey               | 1993 |
| 333 | KX148167 | 94005TUR | dog          | Turkey               | 1993 |
| 334 | KX148168 | 87006ARS | fox          | Saudi Arabia         | 1987 |
| 335 | KX148169 | 91034OMA | camel        | Oman                 | 1990 |
| 336 | KX148170 | 91035OMA | fox          | Oman                 | 1990 |
| 337 | KX148171 | 91024EAU | fox          | United Arab Emirates | 1991 |
| 338 | KX148172 | 87007ARS | horse        | Saudi Arabia         | 1987 |
| 339 | KX148173 | 97139ARS | fox          | Saudi Arabia         | 1997 |
| 340 | KX148174 | 98001ARS | fox          | Saudi Arabia         | 1998 |
| 341 | KX148175 | 99004ARS | fox          | Saudi Arabia         | 1998 |
| 342 | KX148176 | 04034ARS | fox          | Saudi Arabia         | 2004 |

|     |          |          |              |            |      |
|-----|----------|----------|--------------|------------|------|
| 343 | KX148177 | 96317ISR | fox          | Israel     | 1996 |
| 344 | KX148178 | 96306ISR | dog          | Israel     | 1996 |
| 345 | KX148179 | 96314ISR | jackal       | Israel     | 1996 |
| 346 | KX148180 | 93030ISR | fox          | Israel     | 1993 |
| 347 | KX148181 | 96312ISR | dog          | Israel     | 1996 |
| 348 | KX148182 | 96307ISR | dog          | Israel     | 1996 |
| 349 | KX148183 | 93031ISR | fox          | Israel     | 1993 |
| 350 | KX148184 | 96324ISR | cattle       | Israel     | 1996 |
| 351 | KX148185 | 96299IRA | wolf         | Iran       | 1996 |
| 352 | KX148186 | 87002IRA | wolf         | Iran       | 1984 |
| 353 | KX148187 | 96320IRA | jackal       | Iran       | 1996 |
| 354 | KX148188 | 93009IRA | wolf         | Iran       | 1991 |
| 355 | KX148189 | 86081IRA | dog          | Iran       | 1985 |
| 356 | KX148190 | 93008IRA | jackal       | Iran       | 1976 |
| 357 | KX148191 | 93032ISR | jackal       | Israel     | 1993 |
| 358 | KX148192 | 93033ISR | dog          | Israel     | 1993 |
| 359 | KX148198 | 93128SOM | dog          | Somalia    | 1993 |
| 360 | KX148199 | 93006SOM | jackal       | Somalia    | 1993 |
| 361 | KX148200 | 88008ETH | dog          | Ethiopia   | 1988 |
| 362 | KX148202 | 95049GAB | dog          | Gabon      | 1995 |
| 363 | KX148203 | 86031MOZ | dog          | Mozambique | 1986 |
| 364 | KX148204 | 92030NAM | dog          | Namibia    | 1992 |
| 365 | KX148205 | 94289RWA | dog          | Rwanda     | 1994 |
| 366 | KX148206 | 96013TAN | dog          | Tanzania   | 1996 |
| 367 | KX148207 | 14015ITA | Homo sapiens | Kenya      | 2014 |

|     |          |          |              |                          |      |
|-----|----------|----------|--------------|--------------------------|------|
| 368 | KX148208 | 92029CAR | dog          | Central African Republic | 1992 |
| 369 | KX148209 | 04033MAD | dog          | Madagascar               | 2004 |
| 370 | KX148210 | 98002MAD | Homo sapiens | Madagascar               | 1998 |
| 371 | KX148211 | 86046MAD | dog          | Madagascar               | 1986 |
| 372 | KX148212 | 93019IRA | jackal       | Iran                     | 1993 |
| 373 | KX148213 | 91001USA | skunk        | USA                      | 1982 |
| 374 | KX148214 | 95023BRE | dog          | Brazil                   | 1995 |
| 375 | KX148215 | 95022BRE | dog          | Brazil                   | 1995 |
| 376 | KX148216 | 86001BRE | dog          | Brazil                   | 1986 |
| 377 | KX148217 | 86123BRE | dog          | Brazil                   | 1986 |
| 378 | KX148218 | 14016BOT | wild cat     | Botswana                 | 2009 |
| 379 | KX148219 | 14017BOT | honey badger | Botswana                 | 2009 |
| 380 | KX148220 | 15001AFS | mongoose     | South Africa             | 2013 |
| 381 | KX148221 | 15003AFS | squirrel     | South Africa             | 2014 |
| 382 | KX148222 | 15002AFS | mongoose     | South Africa             | 2014 |
| 383 | KX148223 | 14018AFS | feline       | South Africa             | 2000 |
| 384 | KX148224 | 91004USA | skunk        | USA                      | 1991 |
| 385 | KX148225 | 02052AFG | dog          | Afghanistan              | 2002 |
| 386 | KX148226 | 04035AFG | dog          | Afghanistan              | 2002 |
| 387 | KX148227 | 04029AFG | dog          | Afghanistan              | 2004 |
| 388 | KX148228 | 99001NEP | dog          | Nepal                    | 1998 |
| 389 | KX148229 | 90012NIG | dog          | Niger                    | 1990 |
| 390 | KX148230 | 95047HAV | dog          | Burkina Faso             | 1995 |
| 391 | KX148231 | 90010NIG | dog          | Niger                    | 1990 |



|     |          |          |              |               |      |
|-----|----------|----------|--------------|---------------|------|
| 392 | KX148232 | 92037CI  | dog          | Cote d'Ivoire | 1992 |
| 393 | KX148233 | 92038CI  | dog          | Cote d'Ivoire | 1992 |
| 394 | KX148234 | 86036HAV | dog          | Burkina Faso  | 1986 |
| 395 | KX148235 | 01007CI  | dog          | Cote d'Ivoire | 2001 |
| 396 | KX148236 | 93011MAU | dog          | Mauritania    | 1993 |
| 397 | KX148237 | 93012MAU | dog          | Mauritania    | 1993 |
| 398 | KX148238 | 93003SEN | dog          | Senegal       | 1991 |
| 399 | KX148239 | 93005SEN | dog          | Senegal       | 1992 |
| 400 | KX148240 | 90021TCH | dog          | Chad          | 1990 |
| 401 | KX148241 | 96009TCH | dog          | Chad          | 1996 |
| 402 | KX148242 | 95002CAM | dog          | Cameroon      | 1994 |
| 403 | KX148243 | 88003CAM | dog          | Cameroon      | 1987 |
| 404 | KX148244 | 90024GUI | dog          | Guinea        | 1990 |
| 405 | KX148245 | 09029NEP | buffalo      | Nepal         | 2009 |
| 406 | KX148246 | 97002IND | Homo sapiens | India         | 1997 |
| 407 | KX148247 | 99009BIR | dog          | Myanmar       | 1999 |
| 408 | KX148248 | 99015BIR | dog          | Myanmar       | 1999 |
| 409 | KX148249 | 02006CBG | dog          | Cambodia      | 1998 |
| 410 | KX148250 | 99016CBG | dog          | Cambodia      | 1999 |
| 411 | KX148251 | 99011CBG | dog          | Cambodia      | 1998 |
| 412 | KX148253 | 99012CBG | dog          | Cambodia      | 1998 |
| 413 | KX148254 | 01016VNM | dog          | Viet Nam      | 2001 |
| 414 | KX148259 | 94272PHI | dog          | Philippines   | 1994 |
| 415 | KX148260 | 04030PHI | dog          | Philippines   | 2004 |
| 416 | KX148261 | 94281PHI | dog          | Philippines   | 1994 |

|     |          |                   |                       |                 |      |
|-----|----------|-------------------|-----------------------|-----------------|------|
| 417 | KX148262 | 94278PHI          | dog                   | Philippines     | 1994 |
| 418 | KX148263 | 94275PHI          | dog                   | Philippines     | 1994 |
| 419 | KX148265 | 98011CHI          | dog                   | China           | 1998 |
| 420 | KX148266 | 03003INDO         | dog                   | Indonesia       | 2003 |
| 421 | KX148267 | 02050CHI          | Homo sapiens          | China           | 1992 |
| 422 | KX148268 | 90001FRA          | dog                   | French Guiana   | 1990 |
| 423 | KX148269 | 97004ARG          | Tadarida brasiliensis | Argentina       | 1997 |
| 424 | KX708499 | 2041MxYucgod15    | dog                   | Mexico: Yucatan | 2015 |
| 425 | KX708502 | 5559MxChisdog12   | dog                   | Mexico: Chiapas | 2012 |
| 426 | KX708503 | 2835MxChisdog14   | dog                   | Mexico: Chiapas | 2014 |
| 427 | KX954123 | RUS_FJL_2016      | Vulpes lagopus        | Russia          | 2016 |
| 428 | KY765901 | TajikFTA          | dog                   | Tajikistan      | 2012 |
| 429 | KY775603 | IGU-R201-Nilgai   | nilgai                | India           | 2014 |
| 430 | KY775604 | IGU-R202-Mongoose | mongoose              | India           | 2014 |
| 431 | KY780299 | CTMZZ11           | Homo sapiens          | China           | 2017 |
| 432 | LM645015 | Gra07.06-1-F      | Polar fox             | Greenland       | 2006 |
| 433 | LM645018 | 23.06-2-F         | Polar fox             | Greenland       | 2006 |
| 434 | LM645019 | 03.10-2-F         | Polar fox             | Greenland       | 2010 |
| 435 | LM645020 | 02.07-3-F         | Polar fox             | Greenland       | 2007 |
| 436 | LM645022 | 24.06-3-D         | Dog                   | Greenland       | 2006 |
| 437 | LM645023 | 08.06-3-F         | Polar fox             | Greenland       | 2006 |
| 438 | LM645024 | 10.06-3-F         | Polar fox             | Greenland       | 2006 |
| 439 | LM645027 | 25.06-3-F         | Polar fox             | Greenland       | 2006 |
| 440 | LM645029 | 09.07-4-F         | Polar fox             | Greenland       | 2007 |
| 441 | LM645033 | 02.10-5-F         | Polar fox             | Greenland       | 2010 |

|     |          |                |                        |            |      |
|-----|----------|----------------|------------------------|------------|------|
| 442 | LM645034 | 07.09-6-F      | Polar fox              | Greenland  | 2009 |
| 443 | LM645035 | 07.10-6-F      | Polar fox              | Greenland  | 2010 |
| 444 | LM645037 | 10.08-6-F      | Polar fox              | Greenland  | 2008 |
| 445 | LM645039 | 01.09-7-S      | Sheep                  | Greenland  | 2009 |
| 446 | LM645040 | 02.09-7-S      | Sheep                  | Greenland  | 2009 |
| 447 | LM645042 | 03.09-7-F      | Polar fox              | Greenland  | 2009 |
| 448 | LM645045 | 05.07-7-F      | Polar fox              | Greenland  | 2007 |
| 449 | LM645046 | 06.06-7-C      | Cat                    | Greenland  | 2006 |
| 450 | LM645047 | 13.08-7-F      | Polar fox              | Greenland  | 2008 |
| 451 | LM645048 | 18.05-7-F      | Polar fox              | Greenland  | 2005 |
| 452 | LM645049 | 3a.07-7-F      | Polar fox              | Greenland  | 2007 |
| 453 | LM645050 | 3b.07-7-F      | Polar fox              | Greenland  | 2007 |
| 454 | LM645051 | 01.06-7-F      | Polar fox              | Greenland  | 2007 |
| 455 | LM645052 | 02.06-7-F      | Polar fox              | Greenland  | 2006 |
| 456 | LM645053 | 04.07-7-F      | Polar fox              | Greenland  | 2007 |
| 457 | LM645054 | 15.07-7-S      | Sheep                  | Greenland  | 2007 |
| 458 | LM645055 | 21.06-7-F      | Polar fox              | Greenland  | 2006 |
| 459 | LM645056 | 02.08-7-F      | Polar fox              | Greenland  | 2008 |
| 460 | LN879480 | 5989/lib205/12 | Canis lupus familiaris | Azerbaijan | 2002 |
| 461 | LN879481 | 148/lib01041   | Vulpes vulpes          | Germany    | 1998 |

**B. Characteristic of ABLV genomes analyzed in present study.**

| No | Accession | Name                           | Host                         | Country   | Year |
|----|-----------|--------------------------------|------------------------------|-----------|------|
| 1  | AF418014  | Australian bat lyssavirus      | Homo sapiens                 |           |      |
| 2  | KJ685548  | Australian bat lyssavirus H2   | Equus ferus caballus (horse) | Australia | 2013 |
| 3  | KT868953  | Australian bat lyssavirus 1510 | Pteropus alecto              | Australia | 2014 |
| 4  | KT868954  | Australian bat lyssavirus 2549 | Pteropus alecto              | Australia | 2014 |
| 5  | KT868955  | Australian bat lyssavirus 2566 | Pteropus alecto              | Australia | 2014 |
| 6  | KT868956  | Australian bat lyssavirus 2430 | Pteropus scapulatus          | Australia | 2014 |

**C. Characteristic of DUVV genomes analyzed in present study.**

| No | Accession | Name                     | Host         | Country      | Year |
|----|-----------|--------------------------|--------------|--------------|------|
| 1  | EU293119  | Duvenhage virus 86132SA  | Homo sapiens | South Africa | 1971 |
| 2  | EU293120  | Duvenhage virus 94286SA  | Miniopterus  | South Africa | 1981 |
| 3  | EU623444  | Duvenhage virus DUVVSA06 | Homo sapiens | South Africa |      |
| 4  | JN986749  | Duvenhage virus NL07     | Homo sapiens | Netherlands  | 2007 |

**D. Characteristic of EBLV genomes analyzed in present study.**

| No | Accession | Name                               | Host                   | Country | Year |
|----|-----------|------------------------------------|------------------------|---------|------|
| 1  | LT839608  | European bat lyssavirus 1—13424    |                        |         |      |
| 2  | LT839609  | European bat lyssavirus 1—20174    |                        |         |      |
| 3  | LT839610  | European bat lyssavirus 1—976      |                        |         |      |
| 4  | LT839611  | European bat lyssavirus 1—5782     |                        |         |      |
| 5  | LT839612  | European bat lyssavirus 1—5006     |                        |         |      |
| 6  | LT839613  | European bat lyssavirus 1—13027    |                        |         |      |
| 7  | LT839614  | European bat lyssavirus 1—5776     |                        |         |      |
| 8  | LT839615  | European bat lyssavirus 1—13454    |                        |         |      |
| 9  | EF157976  | European bat lyssavirus 1—RV9      | Eptesicus<br>serotinus | Germany | 1968 |
| 10 | EU293109  | European bat lyssavirus 1—03002FRA | Eptesicus<br>serotinus | France  | 2003 |

|    |          |                                    |                          |         |      |
|----|----------|------------------------------------|--------------------------|---------|------|
| 11 | EU293112 | European bat lyssavirus 1—8918FRA  | Eptesicus<br>serotinus   | France  | 1989 |
| 12 | EU626551 | European bat lyssavirus 1—08120FRA | Eptesicus<br>serotinus   | France  | 2008 |
| 13 | EU626552 | European bat lyssavirus 1—07240FRA | cat                      | France  | 2007 |
| 14 | KF155003 | European bat lyssavirus 1—RV20     | Eptesicus<br>serotinus   | Denmark | 1986 |
| 15 | KP241939 | European bat lyssavirus 1—RV2416   | Eptesicus<br>isabellinus | Spain   | 2007 |

**E. Characteristic of LBV genomes analyzed in present study.**

| No | Accession | Name                    | Host                  | Country      | Year |
|----|-----------|-------------------------|-----------------------|--------------|------|
| 1  | EU259198  | Lagos bat virus KE131   | Eidolon helvum        | Kenya        |      |
| 2  | EU293108  | Lagos bat virus 0406SEN | Eidolon helvum        | Senegal      | 1985 |
| 3  | EU293110  | Lagos bat virus 8619NGA | Eidolon helvum        | Nigeria      | 1956 |
| 4  | GU170202  | Lagos bat virus KE576   | Rousettus aegyptiacus | Kenya        |      |
| 5  | JX901139  | Lagos bat virus KE476   | Rousettus aegyptiacus | Kenya        | 2010 |
| 6  | LN849915  | Lagos bat virus 31225   | Eidolon helvum        | Ghana:Kumasi |      |



**F. Characteristic of MOKV genomes analyzed in present study.**

| No | Accession | Name                  | Host   | Country                     | Year |
|----|-----------|-----------------------|--------|-----------------------------|------|
| 1  | NC_006429 | Mokola virus          |        |                             |      |
| 2  | EU293117  | Mokola virus 86100CAM | shrew  | Cameroon                    | 1974 |
| 3  | EU293118  | Mokola virus 86101RCA | rodent | Central African<br>Republic | 1981 |
| 4  | KF155006  | Mokola virus RV1035   | feline | Zimbabwe                    | 1982 |
| 5  | KF155007  | Mokola virus RV1017   | feline | Zimbabwe                    | 1993 |
| 6  | KF155008  | Mokola virus RV1021   | feline | South Africa                | 1996 |
