# Supplementary material for: Comprehensive Analysis of Codon Usage on Rabies Virus and Other Lyssaviruses
Source: MDPI journal article supplement (doi:10.3390/ijms19082397), 2018-08-14
Supplement: s1 [file s1]

### Supplemental table 3 Summary of correlation analysis between several elements in other lyssavirus genome coding sequences.

#### A. Summary of correlation analysis between several elements in LBV genome coding sequences.

|          | A%                   | C%                   | G%       | U%                   | A3s                  | C3s                 | G3s                  | U3s                  | AU                   | GC                  | GC1s                | GC2s                 | GC12s               | ENC     | Axis1   | Axis2  | Gravy   |
|----------|----------------------|----------------------|----------|----------------------|----------------------|---------------------|----------------------|----------------------|----------------------|---------------------|---------------------|----------------------|---------------------|---------|---------|--------|---------|
| A%       |                      |                      |          |                      |                      |                     |                      |                      |                      |                     |                     |                      |                     |         |         |        |         |
| C%       | -0.940**             |                      |          |                      |                      |                     |                      |                      |                      |                     |                     |                      |                     |         |         |        |         |
| G%       | -0.997**             | 0.959**              |          |                      |                      |                     |                      |                      |                      |                     |                     |                      |                     |         |         |        |         |
| U%       | 0.941**              | -0.999 <sup>NS</sup> | -0.961** |                      |                      |                     |                      |                      |                      |                     |                     |                      |                     |         |         |        |         |
| A3s      | 0.995**              | -0.903*              | -0.985** | 0.904*               |                      |                     |                      |                      |                      |                     |                     |                      |                     |         |         |        |         |
| C3s      | -0.959**             | 0.997**              | 0.973**  | -0.995**             | -0.930**             |                     |                      |                      |                      |                     |                     |                      |                     |         |         |        |         |
| G3s      | -0.998**             | 0.919**              | 0.991**  | -0.920**             | -0.998**             | 0.942**             |                      |                      |                      |                     |                     |                      |                     |         |         |        |         |
| U3s      | 0.958**              | -0.998**             | -0.974** | 0.998**              | 0.926**              | -0.998**            | -0.941**             |                      |                      |                     |                     |                      |                     |         |         |        |         |
| AU       | 0.983**              | -0.986**             | -0.993** | 0.987**              | 0.961**              | -0.993**            | -0.971**             | 0.993**              |                      |                     |                     |                      |                     |         |         |        |         |
| GC       | -0.983*              | 0.986**              | 0.993**  | -0.987**             | -0.961**             | 0.993**             | 0.971**              | -0.993**             | -1.000**             |                     |                     |                      |                     |         |         |        |         |
| GC1s     | -0.900 <sup>NS</sup> | 0.986**              | 0.927**  | -0.989**             | -0.852*              | 0.973**             | 0.872*               | -0.980**             | -0.962**             | 0.962**             |                     |                      |                     |         |         |        |         |
| GC2s     | 0.031 <sup>NS</sup>  | 0.269 <sup>NS</sup>  | 0.041**  | -0.281 <sup>NS</sup> | 0.127 <sup>NS</sup>  | 0.197 <sup>NS</sup> | -0.090 <sup>NS</sup> | -0.222 <sup>NS</sup> | -0.134 <sup>NS</sup> | 0.134 <sup>NS</sup> | 0.386 <sup>NS</sup> |                      |                     |         |         |        |         |
| GC12s    | -0.774**             | 0.928**              | 0.817*   | -0.933**             | -0.707 <sup>NS</sup> | 0.897*              | 0.734 <sup>NS</sup>  | -0.909*              | -0.871*              | 0.871*              | 0.970**             | 0.598 <sup>NS</sup>  |                     |         |         |        |         |
| ENC      | -0.932**             | 0.993**              | 0.953**  | -0.995**             | -0.895*              | 0.989**             | 0.910*               | -0.992**             | -0.979**             | 0.979**             | 0.979**             | 0.304 <sup>NS</sup>  | 0.931**             |         |         |        |         |
| Axis1    | -0.995**             | 0.965**              | 0.997**  | -0.964**             | -0.983**             | 0.979**             | 0.987**              | -0.976**             | -0.994**             | 0.994**             | 0.930**             | 0.045 <sup>NS</sup>  | 0.820*              | 0.957** |         |        |         |
| Axis2    | -0.898*              | 0.990**              | 0.926**  | -0.992**             | -0.854*              | 0.980**             | 0.875*               | -0.985**             | -0.960**             | 0.960**             | 0.983**             | 0.360 <sup>NS</sup>  | 0.948**             | 0.992** | 0.928** |        |         |
| Gravy    | -0.988**             | 0.933**              | 0.982**  | -0.930**             | -0.986**             | 0.957**             | 0.990**              | -0.950**             | -0.972**             | 0.972**             | 0.877*              | -0.092 <sup>NS</sup> | 0.738 <sup>NS</sup> | 0.917*  | 0.983** | 0.892* |         |
| Aromatic | -0.951**             | 0.852*               | 0.938**  | -0.850*              | -0.966**             | 0.888*              | 0.965**              | -0.880**             | -0.909*              | 0.909*              | 0.769 <sup>NS</sup> | -0.225 <sup>NS</sup> | 0.610 <sup>NS</sup> | 0.851*  | 0.933** | 0.816* | 0.972** |

NS means non-significant (P > 0.05).

\* represents 0.01 < P < 0.05.

\*\* represents P < 0.01.

**B. Summary of correlation analysis between several elements in ABLV genome coding sequences.**

|          | A%                         | C%                         | G%                         | U%                         | A3s                        | C3s                        | G3s                        | U3s                        | AU                         | GC                         | GC1s                       | GC2s                       | GC12s                      | ENC                        | Axis1                      | Axis2                      | Gravy                     |
|----------|----------------------------|----------------------------|----------------------------|----------------------------|----------------------------|----------------------------|----------------------------|----------------------------|----------------------------|----------------------------|----------------------------|----------------------------|----------------------------|----------------------------|----------------------------|----------------------------|---------------------------|
| A%       |                            |                            |                            |                            |                            |                            |                            |                            |                            |                            |                            |                            |                            |                            |                            |                            |                           |
| C%       | <b>0.277<sup>NS</sup></b>  |                            |                            |                            |                            |                            |                            |                            |                            |                            |                            |                            |                            |                            |                            |                            |                           |
| G%       | <b>-0.551<sup>NS</sup></b> | <b>-0.931<sup>**</sup></b> |                            |                            |                            |                            |                            |                            |                            |                            |                            |                            |                            |                            |                            |                            |                           |
| U%       | <b>-0.378<sup>NS</sup></b> | <b>-0.993<sup>**</sup></b> | <b>0.946<sup>**</sup></b>  |                            |                            |                            |                            |                            |                            |                            |                            |                            |                            |                            |                            |                            |                           |
| A3s      | <b>0.952<sup>**</sup></b>  | <b>0.030<sup>NS</sup></b>  | <b>-0.335<sup>NS</sup></b> | <b>-0.135<sup>NS</sup></b> |                            |                            |                            |                            |                            |                            |                            |                            |                            |                            |                            |                            |                           |
| C3s      | <b>0.321<sup>NS</sup></b>  | <b>0.996<sup>**</sup></b>  | <b>-0.949<sup>**</sup></b> | <b>-0.992<sup>**</sup></b> | <b>0.088<sup>NS</sup></b>  |                            |                            |                            |                            |                            |                            |                            |                            |                            |                            |                            |                           |
| G3s      | <b>-0.878<sup>*</sup></b>  | <b>-0.044<sup>NS</sup></b> | <b>0.353<sup>NS</sup></b>  | <b>0.130<sup>NS</sup></b>  | <b>-0.963<sup>**</sup></b> | <b>-0.113<sup>NS</sup></b> |                            |                            |                            |                            |                            |                            |                            |                            |                            |                            |                           |
| U3s      | <b>-0.369<sup>NS</sup></b> | <b>-0.993<sup>**</sup></b> | <b>0.959<sup>**</sup></b>  | <b>0.995<sup>**</sup></b>  | <b>-0.137<sup>NS</sup></b> | <b>-0.999<sup>**</sup></b> | <b>0.155<sup>NS</sup></b>  |                            |                            |                            |                            |                            |                            |                            |                            |                            |                           |
| AU       | <b>-0.267<sup>NS</sup></b> | <b>-0.990<sup>**</sup></b> | <b>0.893<sup>*</sup></b>   | <b>0.989<sup>**</sup></b>  | <b>-0.026<sup>NS</sup></b> | <b>-0.982<sup>**</sup></b> | <b>0.026<sup>NS</sup></b>  | <b>0.980<sup>**</sup></b>  |                            |                            |                            |                            |                            |                            |                            |                            |                           |
| GC       | <b>0.267<sup>NS</sup></b>  | <b>0.990<sup>**</sup></b>  | <b>-0.893<sup>*</sup></b>  | <b>-0.989<sup>**</sup></b> | <b>0.026<sup>NS</sup></b>  | <b>0.982<sup>**</sup></b>  | <b>-0.026<sup>NS</sup></b> | <b>-0.980<sup>**</sup></b> | <b>-1.000<sup>**</sup></b> |                            |                            |                            |                            |                            |                            |                            |                           |
| GC1s     | <b>-0.499<sup>NS</sup></b> | <b>-0.809<sup>NS</sup></b> | <b>0.931<sup>**</sup></b>  | <b>0.808</b>               | <b>-0.326<sup>NS</sup></b> | <b>-0.846<sup>*</sup></b>  | <b>0.387<sup>NS</sup></b>  | <b>0.853<sup>*</sup></b>   | <b>0.733<sup>NS</sup></b>  | <b>-0.733<sup>NS</sup></b> |                            |                            |                            |                            |                            |                            |                           |
| GC2s     | <b>0.512<sup>NS</sup></b>  | <b>0.958<sup>**</sup></b>  | <b>-0.957<sup>**</sup></b> | <b>-0.982<sup>**</sup></b> | <b>0.261<sup>NS</sup></b>  | <b>0.957<sup>**</sup></b>  | <b>-0.221<sup>NS</sup></b> | <b>-0.968<sup>**</sup></b> | <b>-0.952<sup>**</sup></b> | <b>0.952<sup>**</sup></b>  | <b>-0.808<sup>NS</sup></b> |                            |                            |                            |                            |                            |                           |
| GC12s    | <b>-0.324<sup>NS</sup></b> | <b>-0.410<sup>NS</sup></b> | <b>0.603<sup>NS</sup></b>  | <b>0.387<sup>NS</sup></b>  | <b>-0.279<sup>NS</sup></b> | <b>-0.469<sup>NS</sup></b> | <b>0.411<sup>NS</sup></b>  | <b>0.470<sup>NS</sup></b>  | <b>0.295<sup>NS</sup></b>  | <b>-0.295<sup>NS</sup></b> | <b>0.847<sup>*</sup></b>   | <b>-0.371<sup>NS</sup></b> |                            |                            |                            |                            |                           |
| ENC      | <b>0.105<sup>NS</sup></b>  | <b>0.979<sup>**</sup></b>  | <b>-0.875<sup>*</sup></b>  | <b>-0.948<sup>**</sup></b> | <b>-0.146<sup>NS</sup></b> | <b>0.969<sup>**</sup></b>  | <b>0.117<sup>NS</sup></b>  | <b>-0.956<sup>**</sup></b> | <b>-0.956<sup>**</sup></b> | <b>0.956<sup>**</sup></b>  | <b>-0.791<sup>NS</sup></b> | <b>0.891<sup>*</sup></b>   | <b>-0.443<sup>NS</sup></b> |                            |                            |                            |                           |
| Axis1    | <b>0.460<sup>NS</sup></b>  | <b>0.828<sup>*</sup></b>   | <b>-0.789<sup>NS</sup></b> | <b>-0.863<sup>*</sup></b>  | <b>0.290<sup>NS</sup></b>  | <b>0.849<sup>*</sup></b>   | <b>-0.274<sup>NS</sup></b> | <b>-0.863<sup>*</sup></b>  | <b>-0.850<sup>*</sup></b>  | <b>0.850<sup>*</sup></b>   | <b>-0.710<sup>NS</sup></b> | <b>0.839<sup>*</sup></b>   | <b>-0.362<sup>NS</sup></b> | <b>0.754<sup>NS</sup></b>  |                            |                            |                           |
| Axis2    | <b>0.930<sup>**</sup></b>  | <b>0.136<sup>NS</sup></b>  | <b>-0.392<sup>NS</sup></b> | <b>-0.241<sup>NS</sup></b> | <b>0.897<sup>*</sup></b>   | <b>0.161<sup>NS</sup></b>  | <b>-0.797<sup>NS</sup></b> | <b>-0.208<sup>NS</sup></b> | <b>-0.148<sup>NS</sup></b> | <b>0.148<sup>NS</sup></b>  | <b>-0.253<sup>NS</sup></b> | <b>0.395<sup>NS</sup></b>  | <b>-0.042<sup>NS</sup></b> | <b>-0.047<sup>NS</sup></b> | <b>0.225<sup>NS</sup></b>  |                            |                           |
| Gravy    | <b>-0.289<sup>NS</sup></b> | <b>0.749<sup>NS</sup></b>  | <b>-0.592<sup>NS</sup></b> | <b>-0.673<sup>NS</sup></b> | <b>-0.423<sup>NS</sup></b> | <b>0.752<sup>NS</sup></b>  | <b>0.272<sup>NS</sup></b>  | <b>-0.718<sup>NS</sup></b> | <b>-0.717<sup>NS</sup></b> | <b>0.717<sup>NS</sup></b>  | <b>-0.617<sup>NS</sup></b> | <b>0.532<sup>NS</sup></b>  | <b>-0.492<sup>NS</sup></b> | <b>0.837<sup>*</sup></b>   | <b>0.530<sup>NS</sup></b>  | <b>-0.468<sup>NS</sup></b> |                           |
| Aromatic | <b>0.034<sup>NS</sup></b>  | <b>-0.937<sup>**</sup></b> | <b>0.799<sup>NS</sup></b>  | <b>0.892<sup>*</sup></b>   | <b>0.290<sup>NS</sup></b>  | <b>-0.915<sup>*</sup></b>  | <b>-0.261<sup>NS</sup></b> | <b>0.895<sup>*</sup></b>   | <b>0.916<sup>*</sup></b>   | <b>-0.916<sup>*</sup></b>  | <b>0.694<sup>NS</sup></b>  | <b>-0.828<sup>*</sup></b>  | <b>0.347<sup>NS</sup></b>  | <b>-0.981<sup>**</sup></b> | <b>-0.627<sup>NS</sup></b> | <b>0.133<sup>NS</sup></b>  | <b>-0.842<sup>*</sup></b> |

NS means non-significant (P > 0.05).

\* represents 0.01 < P < 0.05.

\*\* represents P < 0.01.

### C. Summary of correlation analysis between several elements in EBLV genome coding sequences.

|          | A%                   | C%                   | G%                   | U%                   | A3s                  | C3s                  | G3s                  | U3s                  | AU                   | GC                   | GC1s                 | GC2s                 | GC12s                | ENC                  | Axis1               | Axis2   | Gravy                |
|----------|----------------------|----------------------|----------------------|----------------------|----------------------|----------------------|----------------------|----------------------|----------------------|----------------------|----------------------|----------------------|----------------------|----------------------|---------------------|---------|----------------------|
| A%       |                      |                      |                      |                      |                      |                      |                      |                      |                      |                      |                      |                      |                      |                      |                     |         |                      |
| C%       | -0.550**             |                      |                      |                      |                      |                      |                      |                      |                      |                      |                      |                      |                      |                      |                     |         |                      |
| G%       | -0.882**             | 0.556*               |                      |                      |                      |                      |                      |                      |                      |                      |                      |                      |                      |                      |                     |         |                      |
| U%       | 0.440 <sup>NS</sup>  | -0.928**             | -0.626*              |                      |                      |                      |                      |                      |                      |                      |                      |                      |                      |                      |                     |         |                      |
| A3s      | 0.916**              | -0.647**             | -0.874**             | 0.584*               |                      |                      |                      |                      |                      |                      |                      |                      |                      |                      |                     |         |                      |
| C3s      | -0.558*              | 0.962**              | 0.621*               | -0.939**             | -0.713**             |                      |                      |                      |                      |                      |                      |                      |                      |                      |                     |         |                      |
| G3s      | -0.803**             | 0.630*               | 0.928**              | -0.696**             | -0.905**             | 0.701**              |                      |                      |                      |                      |                      |                      |                      |                      |                     |         |                      |
| U3s      | 0.490 <sup>NS</sup>  | -0.892**             | -0.688**             | 0.978**              | 0.625*               | -0.939**             | -0.750**             |                      |                      |                      |                      |                      |                      |                      |                     |         |                      |
| AU       | 0.798**              | -0.851**             | -0.887**             | 0.867**              | 0.859**              | -0.892**             | -0.900**             | 0.910**              |                      |                      |                      |                      |                      |                      |                     |         |                      |
| GC       | -0.798**             | 0.851**              | 0.887**              | -0.867**             | -0.859**             | 0.892**              | 0.900**              | -0.910**             | -1.000**             |                      |                      |                      |                      |                      |                     |         |                      |
| GC1s     | 0.388 <sup>NS</sup>  | -0.517*              | -0.630*              | 0.671**              | 0.640*               | -0.688**             | -0.772**             | 0.765**              | 0.723**              | -0.723**             |                      |                      |                      |                      |                     |         |                      |
| GC2s     | -0.514*              | 0.381 <sup>NS</sup>  | 0.723**              | -0.525*              | -0.448 <sup>NS</sup> | 0.402 <sup>NS</sup>  | 0.618*               | -0.598*              | -0.649**             | 0.649**              | -0.573*              |                      |                      |                      |                     |         |                      |
| GC12s    | 0.187 <sup>NS</sup>  | -0.417 <sup>NS</sup> | -0.367 <sup>NS</sup> | 0.523*               | 0.529*               | -0.611*              | -0.595*              | 0.597*               | 0.519*               | -0.519*              | 0.895**              | -0.146 <sup>NS</sup> |                      |                      |                     |         |                      |
| ENC      | -0.207 <sup>NS</sup> | 0.411 <sup>NS</sup>  | 0.320 <sup>NS</sup>  | -0.468 <sup>NS</sup> | -0.140 <sup>NS</sup> | 0.412 <sup>NS</sup>  | 0.168 <sup>NS</sup>  | -0.502**             | -0.450 <sup>NS</sup> | 0.450 <sup>NS</sup>  | -0.299 <sup>NS</sup> | 0.657**              | -0.003 <sup>NS</sup> |                      |                     |         |                      |
| Axis1    | -0.622*              | 0.668**              | 0.713**              | -0.697**             | -0.852**             | 0.787**              | 0.821**              | -0.726 <sup>NS</sup> | -0.790**             | 0.790**              | -0.816**             | 0.388 <sup>NS</sup>  | -0.773**             | 0.098 <sup>NS</sup>  |                     |         |                      |
| Axis2    | 0.288 <sup>NS</sup>  | -0.227 <sup>NS</sup> | -0.402 <sup>NS</sup> | 0.305 <sup>NS</sup>  | 0.447 <sup>NS</sup>  | -0.361 <sup>NS</sup> | -0.426 <sup>NS</sup> | 0.392 <sup>NS</sup>  | 0.426 <sup>NS</sup>  | -0.426 <sup>NS</sup> | 0.725**              | -0.597*              | 0.550*               | -0.480 <sup>NS</sup> | -0.567*             |         |                      |
| Gravy    | -0.282 <sup>NS</sup> | 0.235 <sup>NS</sup>  | 0.432 <sup>NS</sup>  | -0.339 <sup>NS</sup> | -0.310 <sup>NS</sup> | 0.380 <sup>NS</sup>  | 0.380 <sup>NS</sup>  | -0.481 <sup>NS</sup> | -0.472 <sup>NS</sup> | 0.472 <sup>NS</sup>  | -0.599*              | 0.559*               | -0.418 <sup>NS</sup> | 0.597*               | 0.306 <sup>NS</sup> | -0.604* |                      |
| Aromatic | 0.452 <sup>NS</sup>  | -0.670**             | -0.545*              | 0.694**              | 0.489 <sup>NS</sup>  | -0.691**             | -0.449 <sup>NS</sup> | 0.701**              | 0.688**              | -0.688**             | 0.498 <sup>NS</sup>  | -0.633*              | 0.255 <sup>NS</sup>  | -0.686**             | -0.594*             | 0.652** | -0.491 <sup>NS</sup> |

NS means non-significant ( $P > 0.05$ ).

\* represents  $0.01 < P < 0.05$ .

\*\* represents  $P < 0.01$ .

**D. Summary of correlation analysis between several elements in DUVV genome coding sequences.**

|          | A%                         | C%                         | G%                         | U%                         | A3s                        | C3s                        | G3s                        | U3s                        | AU                         | GC                         | GC1s                       | GC2s                       | GC12s          | ENC            | Axis1          | Axis2          | Gravy          |
|----------|----------------------------|----------------------------|----------------------------|----------------------------|----------------------------|----------------------------|----------------------------|----------------------------|----------------------------|----------------------------|----------------------------|----------------------------|----------------|----------------|----------------|----------------|----------------|
| A%       |                            |                            |                            |                            |                            |                            |                            |                            |                            |                            |                            |                            |                |                |                |                |                |
| C%       | <b>-0.994**</b>            |                            |                            |                            |                            |                            |                            |                            |                            |                            |                            |                            |                |                |                |                |                |
| G%       | <b>-0.985*</b>             | <b>0.992**</b>             |                            |                            |                            |                            |                            |                            |                            |                            |                            |                            |                |                |                |                |                |
| U%       | <b>0.920<sup>NS</sup></b>  | <b>-0.949<sup>NS</sup></b> | <b>-0.973*</b>             |                            |                            |                            |                            |                            |                            |                            |                            |                            |                |                |                |                |                |
| A3s      | <b>0.993**</b>             | <b>-0.975*</b>             | <b>-0.969*</b>             | <b>0.887<sup>NS</sup></b>  |                            |                            |                            |                            |                            |                            |                            |                            |                |                |                |                |                |
| C3s      | <b>-0.972*</b>             | <b>0.969*</b>              | <b>0.930<sup>NS</sup></b>  | <b>-0.846<sup>NS</sup></b> | <b>-0.957*</b>             |                            |                            |                            |                            |                            |                            |                            |                |                |                |                |                |
| G3s      | <b>-0.976*</b>             | <b>0.976*</b>              | <b>0.995**</b>             | <b>-0.965*</b>             | <b>-0.970*</b>             | <b>0.901<sup>NS</sup></b>  |                            |                            |                            |                            |                            |                            |                |                |                |                |                |
| U3s      | <b>0.881<sup>NS</sup></b>  | <b>-0.923<sup>NS</sup></b> | <b>-0.944<sup>NS</sup></b> | <b>0.993**</b>             | <b>0.834<sup>NS</sup></b>  | <b>-0.817<sup>NS</sup></b> | <b>-0.927<sup>NS</sup></b> |                            |                            |                            |                            |                            |                |                |                |                |                |
| AU       | <b>0.998**</b>             | <b>-0.992**</b>            | <b>-0.991**</b>            | <b>0.933<sup>NS</sup></b>  | <b>0.993**</b>             | <b>-0.957*</b>             | <b>-0.987*</b>             | <b>0.893<sup>NS</sup></b>  |                            |                            |                            |                            |                |                |                |                |                |
| GC       | <b>-0.998**</b>            | <b>0.992**</b>             | <b>0.991*</b>              | <b>-0.933<sup>NS</sup></b> | <b>-0.993**</b>            | <b>0.957*</b>              | <b>0.987*</b>              | <b>-0.893<sup>NS</sup></b> | <b>-1.000**</b>            |                            |                            |                            |                |                |                |                |                |
| GC1s     | <b>-0.997**</b>            | <b>0.999**</b>             | <b>0.987<sup>NS</sup></b>  | <b>-0.934<sup>NS</sup></b> | <b>-0.981*</b>             | <b>0.977*</b>              | <b>0.972*</b>              | <b>-0.904<sup>NS</sup></b> | <b>-0.994**</b>            | <b>0.994**</b>             |                            |                            |                |                |                |                |                |
| GC2s     | <b>-0.758<sup>NS</sup></b> | <b>0.826<sup>NS</sup></b>  | <b>0.829*</b>              | <b>-0.912<sup>NS</sup></b> | <b>-0.682<sup>NS</sup></b> | <b>0.739<sup>NS</sup></b>  | <b>0.786<sup>NS</sup></b>  | <b>-0.954*</b>             | <b>-0.762<sup>NS</sup></b> | <b>0.762<sup>NS</sup></b>  | <b>0.802<sup>NS</sup></b>  |                            |                |                |                |                |                |
| GC12s    | <b>-0.955*</b>             | <b>0.982*</b>              | <b>0.976**</b>             | <b>-0.972*</b>             | <b>-0.916<sup>NS</sup></b> | <b>0.935<sup>NS</sup></b>  | <b>0.949*</b>              | <b>-0.968*</b>             | <b>-0.955*</b>             | <b>0.955*</b>              | <b>0.974*</b>              | <b>0.916<sup>NS</sup></b>  |                |                |                |                |                |
| ENC      | <b>-0.985*</b>             | <b>0.996**</b>             | <b>0.998**</b>             | <b>-0.973*</b>             | <b>-0.963*</b>             | <b>0.944<sup>NS</sup></b>  | <b>0.985*</b>              | <b>-0.950*</b>             | <b>-0.988*</b>             | <b>0.988*</b>              | <b>0.991**</b>             | <b>0.853<sup>NS</sup></b>  | <b>0.988*</b>  |                |                |                |                |
| Axis1    | <b>-0.993**</b>            | <b>0.992**</b>             | <b>0.997**</b>             | <b>-0.953*</b>             | <b>-0.985*</b>             | <b>0.942<sup>NS</sup></b>  | <b>0.994**</b>             | <b>-0.916<sup>NS</sup></b> | <b>-0.998**</b>            | <b>0.998**</b>             | <b>0.991**</b>             | <b>0.787<sup>NS</sup></b>  | <b>0.962*</b>  | <b>0.993**</b> |                |                |                |
| Axis2    | <b>-0.989*</b>             | <b>0.997**</b>             | <b>0.998**</b>             | <b>-0.968*</b>             | <b>-0.970*</b>             | <b>0.947<sup>NS</sup></b>  | <b>0.987*</b>              | <b>-0.942<sup>NS</sup></b> | <b>-0.992**</b>            | <b>0.992**</b>             | <b>0.993**</b>             | <b>0.839<sup>NS</sup></b>  | <b>0.984*</b>  | <b>1.000**</b> | <b>0.996**</b> |                |                |
| Gravy    | <b>-0.969*</b>             | <b>0.990**</b>             | <b>0.977*</b>              | <b>-0.957*</b>             | <b>-0.935<sup>NS</sup></b> | <b>0.958*</b>              | <b>0.950*</b>              | <b>-0.947<sup>NS</sup></b> | <b>-0.966*</b>             | <b>0.966*</b>              | <b>0.985*</b>              | <b>0.889<sup>NS</sup></b>  | <b>0.997**</b> | <b>0.989*</b>  | <b>0.969*</b>  | <b>0.987*</b>  |                |
| Aromatic | <b>0.933<sup>NS</sup></b>  | <b>-0.959*</b>             | <b>-0.980*</b>             | <b>0.999**</b>             | <b>0.902<sup>NS</sup></b>  | <b>-0.863<sup>NS</sup></b> | <b>-0.972*</b>             | <b>0.989*</b>              | <b>0.945<sup>NS</sup></b>  | <b>-0.945<sup>NS</sup></b> | <b>-0.946<sup>NS</sup></b> | <b>-0.905<sup>NS</sup></b> | <b>-0.977*</b> | <b>-0.980*</b> | <b>-0.963*</b> | <b>-0.976*</b> | <b>-0.964*</b> |

NS means non-significant ( $P > 0.05$ ).

\* represents  $0.01 < P < 0.05$ .

\*\* represents  $P < 0.01$ .

**E. Summary of correlation analysis between several elements in MOKV genome coding sequences.**

|          | A%                   | C%                   | G%                   | U%                   | A3s                  | C3s                  | G3s                  | U3s                  | AU                   | GC                  | GC1s                 | GC2s                 | GC12s                | ENC                 | Axis1               | Axis2               | Gravy               |
|----------|----------------------|----------------------|----------------------|----------------------|----------------------|----------------------|----------------------|----------------------|----------------------|---------------------|----------------------|----------------------|----------------------|---------------------|---------------------|---------------------|---------------------|
| A%       |                      |                      |                      |                      |                      |                      |                      |                      |                      |                     |                      |                      |                      |                     |                     |                     |                     |
| C%       | -0.184 <sup>NS</sup> |                      |                      |                      |                      |                      |                      |                      |                      |                     |                      |                      |                      |                     |                     |                     |                     |
| G%       | -0.851 <sup>*</sup>  | 0.165 <sup>NS</sup>  |                      |                      |                      |                      |                      |                      |                      |                     |                      |                      |                      |                     |                     |                     |                     |
| U%       | 0.059 <sup>NS</sup>  | -0.901 <sup>*</sup>  | -0.278 <sup>NS</sup> |                      |                      |                      |                      |                      |                      |                     |                      |                      |                      |                     |                     |                     |                     |
| A3s      | 0.906 <sup>*</sup>   | -0.008 <sup>NS</sup> | -0.970 <sup>**</sup> | 0.067 <sup>NS</sup>  |                      |                      |                      |                      |                      |                     |                      |                      |                      |                     |                     |                     |                     |
| C3s      | 0.012 <sup>NS</sup>  | 0.935 <sup>**</sup>  | -0.136 <sup>NS</sup> | -0.756 <sup>NS</sup> | 0.257 <sup>NS</sup>  |                      |                      |                      |                      |                     |                      |                      |                      |                     |                     |                     |                     |
| G3s      | -0.847 <sup>*</sup>  | 0.113 <sup>NS</sup>  | 0.998 <sup>**</sup>  | -0.232 <sup>NS</sup> | -0.980 <sup>**</sup> | -0.182 <sup>NS</sup> |                      |                      |                      |                     |                      |                      |                      |                     |                     |                     |                     |
| U3s      | -0.010 <sup>NS</sup> | -0.966 <sup>**</sup> | 0.082 <sup>NS</sup>  | 0.825 <sup>*</sup>   | -0.230 <sup>NS</sup> | -0.988 <sup>**</sup> | 0.134 <sup>NS</sup>  |                      |                      |                     |                      |                      |                      |                     |                     |                     |                     |
| AU       | 0.671 <sup>NS</sup>  | -0.771 <sup>NS</sup> | -0.755 <sup>NS</sup> | 0.779 <sup>NS</sup>  | 0.632 <sup>NS</sup>  | -0.535 <sup>NS</sup> | -0.719 <sup>NS</sup> | 0.589 <sup>NS</sup>  |                      |                     |                      |                      |                      |                     |                     |                     |                     |
| GC       | -0.671 <sup>NS</sup> | 0.771 <sup>NS</sup>  | 0.755 <sup>NS</sup>  | -0.779 <sup>NS</sup> | -0.632 <sup>NS</sup> | 0.535 <sup>NS</sup>  | 0.719 <sup>NS</sup>  | -0.589 <sup>NS</sup> | -1.000 <sup>**</sup> |                     |                      |                      |                      |                     |                     |                     |                     |
| GC1s     | -0.217 <sup>NS</sup> | -0.079 <sup>NS</sup> | 0.648 <sup>NS</sup>  | -0.275 <sup>NS</sup> | -0.581 <sup>NS</sup> | -0.289 <sup>NS</sup> | 0.672 <sup>NS</sup>  | 0.250 <sup>NS</sup>  | -0.372 <sup>NS</sup> | 0.372 <sup>NS</sup> |                      |                      |                      |                     |                     |                     |                     |
| GC2s     | -0.246 <sup>NS</sup> | 0.302 <sup>NS</sup>  | -0.009 <sup>NS</sup> | -0.075 <sup>NS</sup> | 0.030 <sup>NS</sup>  | 0.227 <sup>NS</sup>  | -0.056 <sup>NS</sup> | -0.290 <sup>NS</sup> | -0.185 <sup>NS</sup> | 0.185 <sup>NS</sup> | -0.673 <sup>NS</sup> |                      |                      |                     |                     |                     |                     |
| GC12s    | -0.551 <sup>NS</sup> | 0.217 <sup>NS</sup>  | 0.854 <sup>*</sup>   | -0.446 <sup>NS</sup> | -0.742 <sup>NS</sup> | -0.142 <sup>NS</sup> | 0.836 <sup>*</sup>   | 0.024 <sup>NS</sup>  | -0.693 <sup>*</sup>  | 0.693 <sup>*</sup>  | 0.614 <sup>NS</sup>  | 0.171 <sup>NS</sup>  |                      |                     |                     |                     |                     |
| ENC      | -0.838 <sup>*</sup>  | 0.639 <sup>NS</sup>  | 0.660 <sup>NS</sup>  | -0.451 <sup>NS</sup> | -0.623 <sup>NS</sup> | 0.462 <sup>NS</sup>  | 0.622 <sup>NS</sup>  | -0.492 <sup>NS</sup> | -0.848 <sup>NS</sup> | 0.848 <sup>NS</sup> | -0.054 <sup>NS</sup> | 0.544 <sup>NS</sup>  | 0.508 <sup>NS</sup>  |                     |                     |                     |                     |
| Axis1    | -0.520 <sup>NS</sup> | 0.793 <sup>NS</sup>  | 0.340 <sup>NS</sup>  | -0.586 <sup>NS</sup> | -0.250 <sup>NS</sup> | 0.661 <sup>NS</sup>  | 0.283 <sup>NS</sup>  | -0.713 <sup>NS</sup> | -0.741 <sup>NS</sup> | 0.741 <sup>NS</sup> | -0.324 <sup>NS</sup> | 0.756 <sup>NS</sup>  | 0.375 <sup>NS</sup>  | 0.895 <sup>*</sup>  |                     |                     |                     |
| Axis2    | -0.082 <sup>NS</sup> | 0.696 <sup>NS</sup>  | 0.224 <sup>NS</sup>  | -0.751 <sup>NS</sup> | -0.109 <sup>NS</sup> | 0.687 <sup>NS</sup>  | 0.213 <sup>NS</sup>  | -0.662 <sup>NS</sup> | -0.614 <sup>NS</sup> | 0.614 <sup>NS</sup> | 0.438 <sup>NS</sup>  | -0.467 <sup>NS</sup> | 0.086 <sup>NS</sup>  | 0.251 <sup>NS</sup> | 0.196 <sup>NS</sup> |                     |                     |
| Gravy    | -0.285 <sup>NS</sup> | 0.269 <sup>NS</sup>  | -0.157 <sup>NS</sup> | 0.104 <sup>NS</sup>  | 0.045 <sup>NS</sup>  | 0.487 <sup>NS</sup>  | -0.155 <sup>NS</sup> | -0.362 <sup>NS</sup> | -0.081 <sup>NS</sup> | 0.081 <sup>NS</sup> | -0.450 <sup>NS</sup> | 0.016 <sup>NS</sup>  | -0.581 <sup>NS</sup> | 0.337 <sup>NS</sup> | 0.247 <sup>NS</sup> | 0.303 <sup>NS</sup> |                     |
| Aromatic | -0.091 <sup>NS</sup> | 0.360 <sup>NS</sup>  | -0.214 <sup>NS</sup> | -0.086 <sup>NS</sup> | 0.164 <sup>NS</sup>  | 0.595 <sup>NS</sup>  | -0.216 <sup>NS</sup> | -0.477 <sup>NS</sup> | -0.104 <sup>NS</sup> | 0.104 <sup>NS</sup> | -0.279 <sup>NS</sup> | -0.215 <sup>NS</sup> | -0.600 <sup>NS</sup> | 0.197 <sup>NS</sup> | 0.134 <sup>NS</sup> | 0.542 <sup>NS</sup> | 0.924 <sup>**</sup> |

NS means non-significant (P > 0.05).

\* represents 0.01 < P < 0.05.

\*\* represents P < 0.01.
