# Supplementary material for: Comprehensive Analysis of Codon Usage on Rabies Virus and Other Lyssaviruses
Source: MDPI journal article supplement (doi:10.3390/ijms19082397), 2018-08-14
Supplement: s1 [file s1]

**Supplemental table 2 Characteristic of add lyssavirus individual gene coding sequences analyzed in present study.**

| No | Accession  | Host       | Country | Year |
|----|------------|------------|---------|------|
| 1  | U17064.1   |            |         |      |
| 2  | AF049113.1 |            |         |      |
| 3  | AF049114.1 |            |         |      |
| 4  | AF049115.1 |            |         |      |
| 5  | AF049116.1 |            |         |      |
| 6  | AF049117.1 |            |         |      |
| 7  | AF049120.1 |            |         |      |
| 8  | AF006497.1 |            |         |      |
| 9  | AF049119.2 |            |         |      |
| 10 | AF369369.1 | Flying fox |         |      |

|    |            |                   |  |  |
|----|------------|-------------------|--|--|
| 11 | AF369370.1 | Flying fox        |  |  |
| 12 | AF369371.1 | Flying fox        |  |  |
| 13 | AF369372.1 | Flying fox        |  |  |
| 14 | AF369373.1 | insectivorous bat |  |  |
| 15 | AF369374.1 |                   |  |  |
| 16 | AF369375.1 |                   |  |  |
| 17 | AF369376.1 |                   |  |  |
| 18 | AF369377.1 |                   |  |  |
| 19 | AF369378.1 |                   |  |  |
| 20 | AF298146.1 |                   |  |  |
| 21 | AF298147.1 |                   |  |  |
| 22 | AF298148.1 |                   |  |  |

|    |            |                             |  |  |
|----|------------|-----------------------------|--|--|
| 23 | AF298149.1 |                             |  |  |
| 24 | AF426290.1 | Pteropus alecto             |  |  |
| 25 | AF426291.1 | Pteropus<br>poliocephalus   |  |  |
| 26 | AF426292.1 | Pteropus scapulatus         |  |  |
| 27 | AF426293.1 | Pteropus alecto             |  |  |
| 28 | AF426294.1 | Pteropus alecto             |  |  |
| 29 | AF426295.1 | Pteropus<br>poliocephalus   |  |  |
| 30 | AF426296.1 | Pteropus<br>poliocephalus   |  |  |
| 31 | AF426297.1 | Saccolaimus<br>flaviventris |  |  |
| 32 | AF426298.1 | Saccolaimus<br>flaviventris |  |  |
| 33 | AF426299.1 | Pteropus<br>poliocephalus   |  |  |
| 34 | AF426300.1 | Pteropus alecto             |  |  |

|    |            |                             |         |      |
|----|------------|-----------------------------|---------|------|
| 35 | AF426301.1 | Saccolaimus<br>flaviventris |         |      |
| 36 | AF426302.1 | Pteropus alecto             |         |      |
| 37 | AF426303.1 | Pteropus scapulatus         |         |      |
| 38 | AF426304.1 | Pteropus alecto             |         |      |
| 39 | AF426305.1 | Pteropus scapulatus         |         |      |
| 40 | AF426306.1 | Pteropus alecto             |         |      |
| 41 | AF426307.1 | Pteropus alecto             |         |      |
| 42 | AF426308.1 | Pteropus alecto             |         |      |
| 43 | AF426309.1 | Pteropus alecto             |         |      |
| 44 | AF426310.1 | Pteropus alecto             |         |      |
| 45 | AF426311.1 | Pteropus alecto             |         |      |
| 46 | AF429312.1 |                             | Nigeria | 1956 |

|    |            |                             |  |  |
|----|------------|-----------------------------|--|--|
| 47 | AY573935.1 | Pteropus alecto             |  |  |
| 48 | AY573936.1 | Pteropus alecto             |  |  |
| 49 | AY573937.1 | Saccolaimus<br>flaviventris |  |  |
| 50 | AY573938.1 | Pteropus alecto             |  |  |
| 51 | AY573939.1 | Pteropus alecto             |  |  |
| 52 | AY573940.1 | Pteropus alecto             |  |  |
| 53 | AY573941.1 | Pteropus<br>poliocephalus   |  |  |
| 54 | AY573942.1 | Pteropus alecto             |  |  |
| 55 | AY573943.1 | Pteropus alecto             |  |  |
| 56 | AY573944.1 | Pteropus scapulatus         |  |  |
| 57 | AY573945.1 | Pteropus<br>poliocephalus   |  |  |
| 58 | AY573947.1 | Pteropus alecto             |  |  |

|    |            |                             |  |  |
|----|------------|-----------------------------|--|--|
| 59 | AY573948.1 | Pteropus<br>poliocephalus   |  |  |
| 60 | AY573949.1 | Saccolaimus<br>flaviventris |  |  |
| 61 | AY573950.1 | Pteropus<br>poliocephalus   |  |  |
| 62 | AY573951.1 | Pteropus scapulatus         |  |  |
| 63 | AY573952.1 | Pteropus scapulatus         |  |  |
| 64 | AY573953.1 | Pteropus scapulatus         |  |  |
| 65 | AY573954.1 | Pteropus alecto             |  |  |
| 66 | AY573955.1 | Pteropus scapulatus         |  |  |
| 67 | AY573957.1 | Pteropus scapulatus         |  |  |
| 68 | AY573958.1 | Pteropus<br>poliocephalus   |  |  |
| 69 | AY573959.1 | Pteropus alecto             |  |  |
| 70 | AY573960.1 | Pteropus scapulatus         |  |  |

|    |            |                             |              |      |
|----|------------|-----------------------------|--------------|------|
| 71 | AY573961.1 | Pteropus alecto             |              |      |
| 72 | AY573962.1 | Pteropus alecto             |              |      |
| 73 | AY573963.1 | Pteropus alecto             |              |      |
| 74 | AY573965.1 | Saccolaimus<br>flaviventris |              |      |
| 75 | DQ499944.1 | Epomophorus<br>whalbergi    | South Africa |      |
| 76 | DQ499945.1 | Epomophorus<br>whalbergi    | South Africa |      |
| 77 | DQ499946.1 | Epomophorus<br>whalbergi    | South Africa |      |
| 78 | DQ499947.1 | Epomophorus<br>whalbergi    | South Africa |      |
| 79 | DQ499948.1 | Atilax paludinosus          | South Africa |      |
| 80 | EF547407.1 |                             | Nigeria      | 1956 |
| 81 | EF547408.1 |                             | South Africa | 1980 |
| 82 | EF547409.1 |                             | South Africa | 2004 |

|    |            |  |                                |      |
|----|------------|--|--------------------------------|------|
| 83 | EF547410.1 |  | South Africa                   | 1982 |
| 84 | EF547411.1 |  | South Africa                   | 1980 |
| 85 | EF547412.1 |  | South Africa                   | 1980 |
| 86 | EF547413.1 |  | South Africa                   | 2003 |
| 87 | EF547414.1 |  | South Africa                   | 2006 |
| 88 | EF547415.1 |  | South Africa                   | 2004 |
| 89 | EF547416.1 |  | Zimbabwe                       | 1986 |
| 90 | EF547417.1 |  | Central<br>African<br>Republic | 1974 |
| 91 | EF547418.1 |  |                                | 1999 |
| 92 | EF547419.1 |  | Senegal                        | 1985 |
| 93 | EF547420.1 |  | South Africa                   | 2006 |



|     |            |  |              |      |
|-----|------------|--|--------------|------|
| 94  | EF547434.1 |  | South Africa | 2003 |
| 95  | EF547435.1 |  | South Africa | 2006 |
| 96  | EF547436.1 |  | South Africa | 1980 |
| 97  | EF547437.1 |  | South Africa | 1980 |
| 98  | EF547438.1 |  | South Africa | 2004 |
| 99  | EF547439.1 |  | South Africa | 1982 |
| 100 | EF547440.1 |  | South Africa | 2004 |
| 101 | EF547441.1 |  | South Africa | 1980 |
| 102 | EF547442.1 |  | Zimbabwe     | 1986 |
| 103 | EF547444.1 |  | Nigeria      | 1956 |
| 104 | EF547445.1 |  |              | 1999 |
| 105 | EF547446.1 |  | Senegal      | 1985 |

|     |            |  |                                |      |
|-----|------------|--|--------------------------------|------|
| 106 | EF547421.1 |  | South Africa                   | 2003 |
| 107 | EF547422.1 |  | South Africa                   | 2006 |
| 108 | EF547423.1 |  | South Africa                   | 2004 |
| 109 | EF547424.1 |  | South Africa                   | 1980 |
| 110 | EF547425.1 |  | South Africa                   | 1982 |
| 111 | EF547426.1 |  | South Africa                   | 1980 |
| 112 | EF547427.1 |  | South Africa                   | 1980 |
| 113 | EF547428.1 |  | South Africa                   | 2004 |
| 114 | EF547429.1 |  | Zimbabwe                       | 1986 |
| 115 | EF547430.1 |  | Central<br>African<br>Republic | 1974 |
| 116 | EF547431.1 |  | Nigeria                        | 1956 |

|     |            |       |                                |      |
|-----|------------|-------|--------------------------------|------|
| 117 | EF547432.1 |       |                                | 1999 |
| 118 | EF547433.1 |       | Senegal                        | 1985 |
| 119 | EF547447.1 | mouse |                                | 1999 |
| 120 | EF547448.1 | mouse | Senegal                        | 1985 |
| 121 | EF547449.1 | mouse | Central<br>African<br>Republic | 1974 |
| 122 | EF547450.1 | mouse | Zimbabwe                       | 1986 |
| 123 | EF547451.1 | mouse | South Africa                   | 2003 |
| 124 | EF547452.1 | mouse | South Africa                   | 2006 |
| 125 | EF547454.1 | mouse | South Africa                   | 1980 |
| 126 | EF547455.1 | mouse | South Africa                   | 1982 |
| 127 | EF547456.1 | mouse | South Africa                   | 1980 |

|     |            |                     |                                |      |
|-----|------------|---------------------|--------------------------------|------|
| 128 | EF547457.1 | mouse               | South Africa                   | 1980 |
| 129 | EF547458.1 | mouse               | South Africa                   | 2004 |
| 130 | EF547459.1 | mouse               | Nigeria                        | 1956 |
| 131 | EU293094.1 | Eptesicus serotinus | France                         | 2003 |
| 132 | EU293095.1 | Eidolon helvum      | Senegal                        | 1985 |
| 133 | EU293096.1 | shrew               | Cameroon                       | 1974 |
| 134 | EU293097.1 | rodent              | Central<br>African<br>Republic | 1981 |
| 135 | EU293098.1 | Homo sapiens        | South Africa                   | 1971 |
| 136 | EU293099.1 | Eidolon helvum      | Nigeria                        | 1956 |
| 137 | EU293101.1 | Eptesicus serotinus | France                         | 1989 |
| 138 | EU293105.1 | Miniopterus         | South Africa                   | 1981 |

|     |            |                     |              |      |
|-----|------------|---------------------|--------------|------|
| 139 | EU352768.1 | Eptesicus serotinus | Germany      |      |
| 140 | EU623437.1 | Homo sapiens        | South Africa |      |
| 141 | EU623438.1 | Chiroptera          | South Africa |      |
| 142 | EU623436.1 | Homo sapiens        | South Africa |      |
| 143 | EU623439.1 | Chiroptera          | South Africa |      |
| 144 | EU623440.1 | Homo sapiens        | South Africa |      |
| 145 | EU623441.1 | Chiroptera          | South Africa |      |
| 146 | EU623442.1 | Homo sapiens        | South Africa |      |
| 147 | EU623443.1 | Chiroptera          | South Africa |      |
| 148 | EU636788.1 | Eptesicus serotinus | France       | 2004 |
| 149 | EU636789.1 | Eptesicus serotinus | France       | 2005 |
| 150 | EU636790.1 | Eptesicus serotinus | France       | 2005 |

|     |            |                     |              |      |
|-----|------------|---------------------|--------------|------|
| 151 | EU636791.1 | Eptesicus serotinus | France       | 2006 |
| 152 | EU636792.1 | Eptesicus serotinus | France       | 2006 |
| 153 | EU636793.1 | Eptesicus serotinus | France       | 2007 |
| 154 | EU636794.1 | Eptesicus serotinus | France       | 2004 |
| 155 | FJ465410.1 | cat                 | South Africa | 1998 |
| 156 | FJ465411.1 | cat                 | South Africa | 1996 |
| 157 | FJ465412.1 | cat                 | South Africa | 2006 |
| 158 | FJ465413.1 | cat                 | South Africa | 1997 |
| 159 | FJ465414.1 | cat                 | South Africa | 1996 |
| 160 | FJ465415.1 | cat                 | South Africa | 1995 |
| 161 | FJ465416.1 | cat                 | South Africa | 1970 |
| 162 | FJ465417.1 | cat                 | Zimbabwe     | 1981 |

|     |            |                              |              |      |
|-----|------------|------------------------------|--------------|------|
| 163 | FJ465418.1 | cat                          | Zimbabwe     | 1981 |
| 164 | GQ500108.1 | feline                       | South Africa | 1998 |
| 165 | GQ500109.1 | feline                       | Zimbabwe     | 1993 |
| 166 | GQ500110.1 | feline                       | South Africa | 1995 |
| 167 | GQ500111.1 | feline                       | South Africa | 1996 |
| 168 | GQ500112.1 | feline                       | South Africa | 1997 |
| 169 | GQ500113.1 | feline                       | South Africa | 1997 |
| 170 | GQ500116.1 | feline                       | South Africa | 1995 |
| 171 | GU992303.1 | Eptesicus serotinus<br>(bat) | France       | 2002 |
| 172 | GU992305.1 | Eptesicus serotinus<br>(bat) | France       | 1989 |
| 173 | GU992310.1 | shrew                        | Cameroon     | 1986 |
| 174 | GU992312.1 | bat                          | Australia    | 1998 |

|     |            |              |                                |      |
|-----|------------|--------------|--------------------------------|------|
| 175 | GU992313.1 | cat          | South Africa                   | 1987 |
| 176 | GU992314.1 | rodent       | Central<br>African<br>Republic | 1986 |
| 177 | GU992315.1 | Homo sapiens | South Africa                   | 1971 |
| 178 | GQ861350.1 | canine       | Zimbabwe                       | 1981 |
| 179 | GQ861351.1 | feline       | South Africa                   | 2006 |
| 180 | GQ861352.1 | canine       | Zimbabwe                       | 1981 |
| 181 | GQ861353.1 | feline       | South Africa                   | 1996 |
| 182 | GQ472989.1 | feline       | South Africa                   | 1970 |
| 183 | GQ472990.1 | canine       | Zimbabwe                       | 1982 |
| 184 | GQ472991.1 | canine       | Zimbabwe                       | 1981 |
| 185 | GQ472993.1 | feline       | Zimbabwe                       | 1993 |



|     |            |                       |              |      |
|-----|------------|-----------------------|--------------|------|
| 186 | GQ472995.1 | feline                | South Africa | 1996 |
| 187 | GQ472996.1 | feline                | South Africa | 1996 |
| 188 | GQ472997.1 | feline                | South Africa | 1997 |
| 189 | GQ472998.1 | feline                | South Africa | 1997 |
| 190 | GQ472999.1 | feline                | South Africa | 2006 |
| 191 | GQ473000.1 | feline                | South Africa | 1998 |
| 192 | GQ473001.1 | feline                | South Africa |      |
| 193 | GQ473002.1 | canine                | Zimbabwe     |      |
| 194 | GQ473003.1 | canine                | Zimbabwe     |      |
| 195 | GQ473004.1 | canine                | Zimbabwe     |      |
| 196 | HM623779.1 | Eidolon helvum        | Nigeria      | 1956 |
| 197 | HM623780.1 | Crocidura sp. (shrew) | Nigeria      | 1968 |

|     |            |                          |              |      |
|-----|------------|--------------------------|--------------|------|
| 198 | HM179509.1 | Epomophorus<br>wahlbergi | South Africa | 2008 |
| 199 | HQ266623.1 | Epomophorus<br>wahlbergi | South Africa | 2008 |
| 200 | HQ266624.1 | feline                   | South Africa | 2006 |
| 201 | HQ266634.1 | Epomophorus<br>wahlbergi | South Africa | 2008 |
| 202 | KC567812.1 | Eptesicus serotinus      | France       | 2004 |
| 203 | KC567813.1 | Eptesicus serotinus      | France       | 2005 |
| 204 | KC567814.1 | Eptesicus serotinus      | France       | 2009 |
| 205 | KC567815.1 | Eptesicus serotinus      | France       | 2006 |
| 206 | KC567816.1 | Eptesicus serotinus      | France       | 2010 |
| 207 | KC567817.1 | Eptesicus serotinus      | France       | 2009 |
| 208 | KC567818.1 | Eptesicus serotinus      | France       | 2009 |
| 209 | GQ472992.1 | feline                   | South Africa | 1995 |

|     |            |                     |              |      |
|-----|------------|---------------------|--------------|------|
| 210 | GQ472994.1 | canine              | Zimbabwe     | 1981 |
| 211 | KF042301.1 | Eptesicus serotinus | Germany      | 2005 |
| 212 | KF042302.1 | Eptesicus serotinus | Germany      | 1993 |
| 213 | KC218932.1 |                     | Zimbabwe     | 1981 |
| 214 | KC218933.1 |                     | Zimbabwe     | 1993 |
| 215 | KC218934.1 |                     | South Africa | 2008 |
| 216 | KC218935.1 |                     | South Africa | 2008 |
| 217 | KC218936.1 |                     | South Africa | 2008 |
| 218 | KC218937.1 |                     | South Africa | 2008 |
| 219 | KP899613.1 | domestic cat        | South Africa | 2012 |
| 220 | KP899614.1 | domestic cat        | South Africa | 2012 |
| 221 | KP899615.1 | domestic cat        | South Africa | 2014 |

|     |            |              |              |      |
|-----|------------|--------------|--------------|------|
| 222 | KP899616.1 | domestic cat | South Africa | 2012 |
| 223 | KP899617.1 | domestic cat | South Africa | 2012 |
| 224 | KP899618.1 | domestic cat | South Africa | 2014 |
| 225 | KP899619.1 | domestic cat | South Africa | 2012 |
| 226 | KP899620.1 | domestic cat | South Africa | 2012 |
| 227 | KP899621.1 | domestic cat | South Africa | 2014 |
| 228 | KU739052.1 | Bat          | Australia    | 1998 |
| 229 | KU739053.1 | Homo sapiens | South Africa | 1971 |
| 230 | KU761302.1 | Homo sapiens | South Africa | 1986 |
| 231 | KU761303.1 | bat          | Nigeria      | 1986 |
