# Supplementary material for: Comprehensive Analysis of Codon Usage on Rabies Virus and Other Lyssaviruses
Source: Int J Mol Sci. 2018 Aug 14;19(8):2397. doi: 10.3390/ijms19082397 (PMC6121662; doi:10.3390/ijms19082397)
Supplement: Supplementary file 1 [file ijms-19-02397-s001.zip]

Archive with 5 entries (5 files):
- suppl fig.pdf
- Table S1 Nucleotide composition analysis .pdf
- Table S2 Characteristic of add lyssavirus individual gene coding sequences analysed in present study..pdf
- Table S3 Summary of correlation analysis between several elements in other lyssavirus genome coding sequences..pdf
- Table S4 Characteristic of lyssavirus genomes analyzed in present study..pdf
